# Supplementary material for: Antibiofilm and Anti-Quorum-Sensing Activities of Novel Pyrazole and Pyrazolo[1,5-a]pyrimidine Derivatives as Carbonic Anhydrase I and II Inhibitors: Design, Synthesis, Radiosterilization, and Molecular Docking Studies
Source: Antibiotics (Basel). 2023 Jan 9;12(1):128. doi: 10.3390/antibiotics12010128 (PMC9854762; doi:10.3390/antibiotics12010128)
Supplement: Supplementary file 1 [file antibiotics-12-00128-s001.zip › antibiotics-2104420-supplementary.pdf]

**Antibiofilm and anti-quorum sensing activities of novel pyrazole and pyrazolo[1,5-*a*]pyrimidine derivatives as carbonic anhydrase I and II inhibitors: Design, synthesis, radio-sterilization, and molecular docking studies**

Ahmed Ragab<sup>1,\*</sup>, Sawsan A. Fouad<sup>2</sup>, Yousry A. Ammar<sup>1</sup>, Dina S. Aboul-Magd<sup>3</sup>, and Moustafa S. Abusaif<sup>1,\*</sup>

<sup>1</sup> Department of Chemistry, Faculty of Science (Boys), Al-Azhar University, Nasr City, 11884, Cairo, Egypt

<sup>2</sup> Department of Chemistry, Faculty of Science (Girls), Al-Azhar University, Nasr City, Cairo, Egypt

<sup>3</sup> Drug Radiation Research Department, National Center for Radiation Research and Technology (NCRRT), Egyptian Atomic Energy Authority, Egypt

**\*Correspondence:** Ahmed Ragab E-mail: [ahmed\\_ragab7@ymail.com](mailto:ahmed_ragab7@ymail.com); [ahmed\\_ragab@azhar.edu.eg](mailto:ahmed_ragab@azhar.edu.eg) Tel.: (0201009341359) and

Yousry A. Ammar ([yossry@yahoo.com](mailto:yossry@yahoo.com))

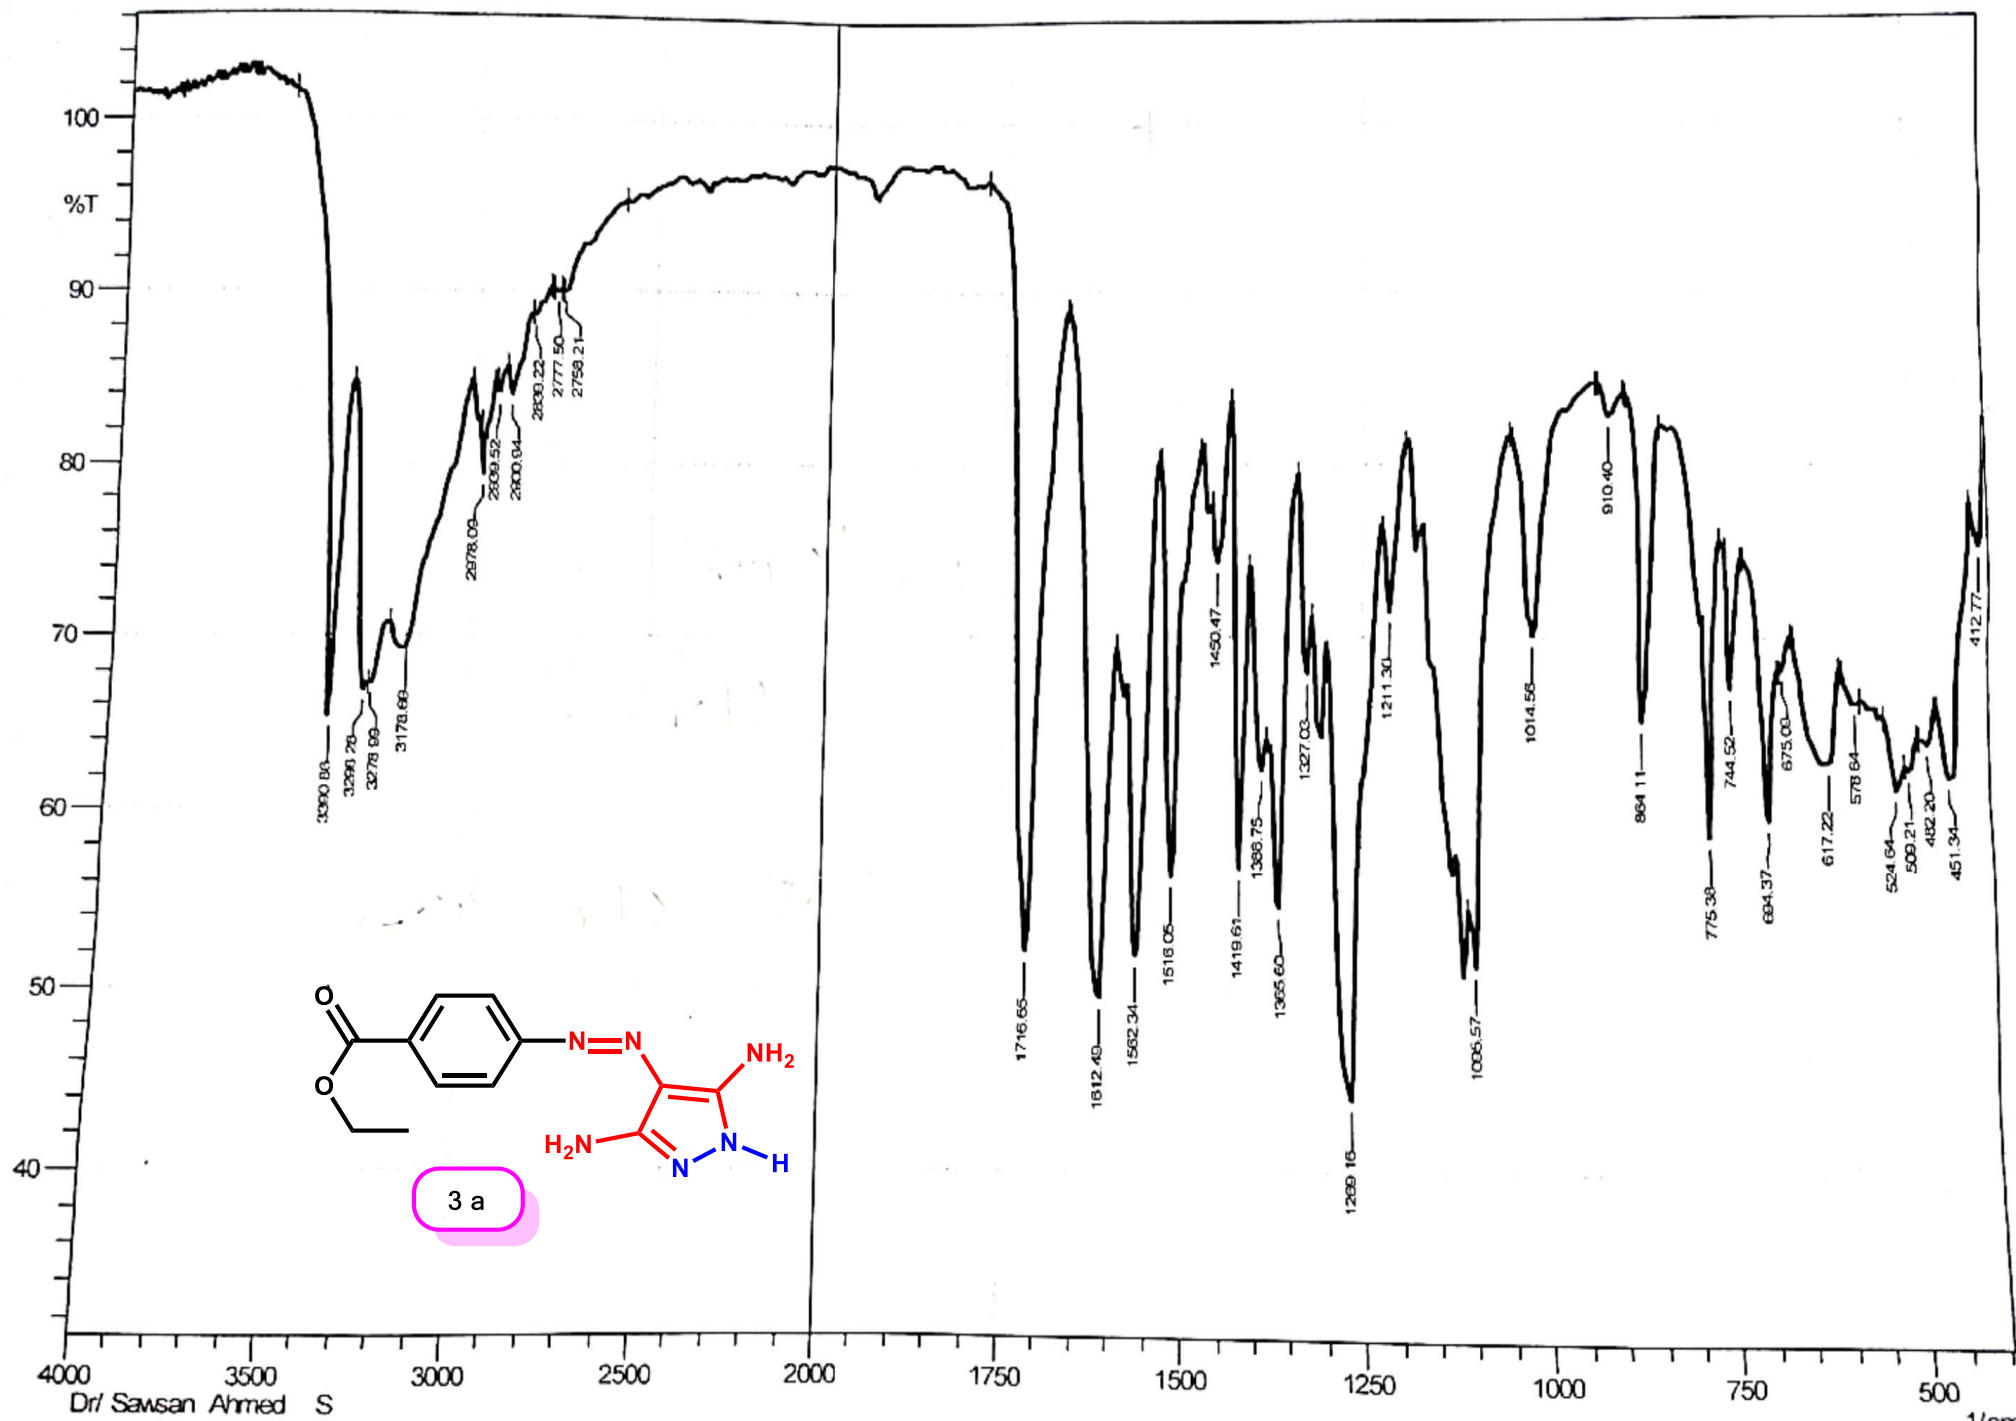

HNMR- DMSO- 3a

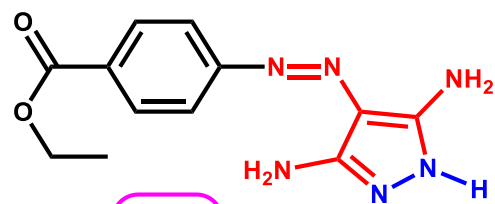

3 a

0.81

2.33

2.00

2.03

1.96

2.09

3.00

10.65

7.92

7.90

7.61

7.60

6.43

5.95

4.28

4.26

4.25

4.24

3.33

2.47

1.29

1.28

1.27

f1 (ppm)

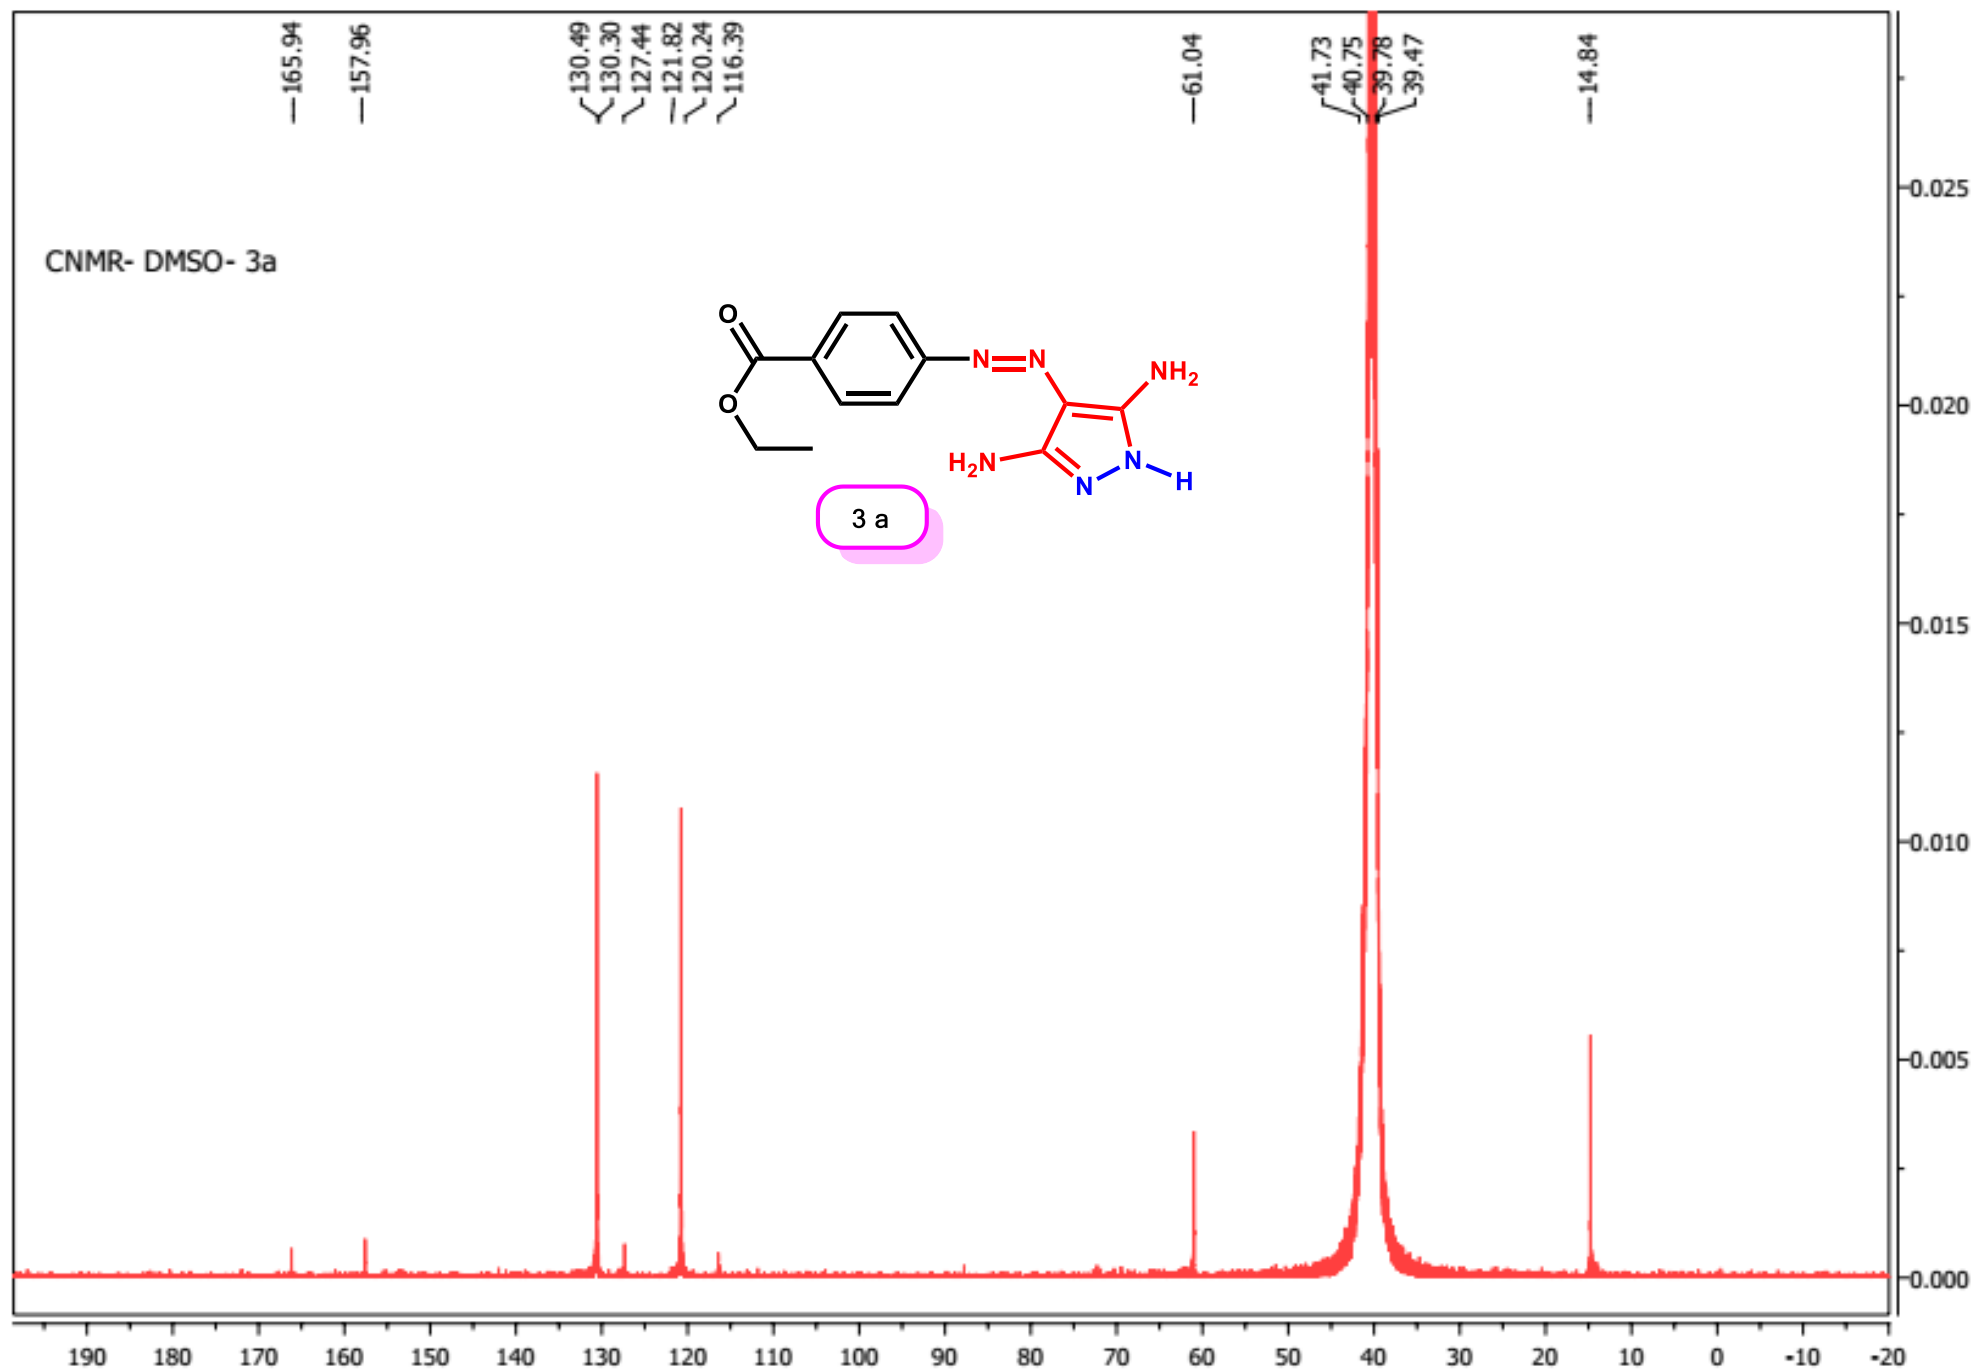

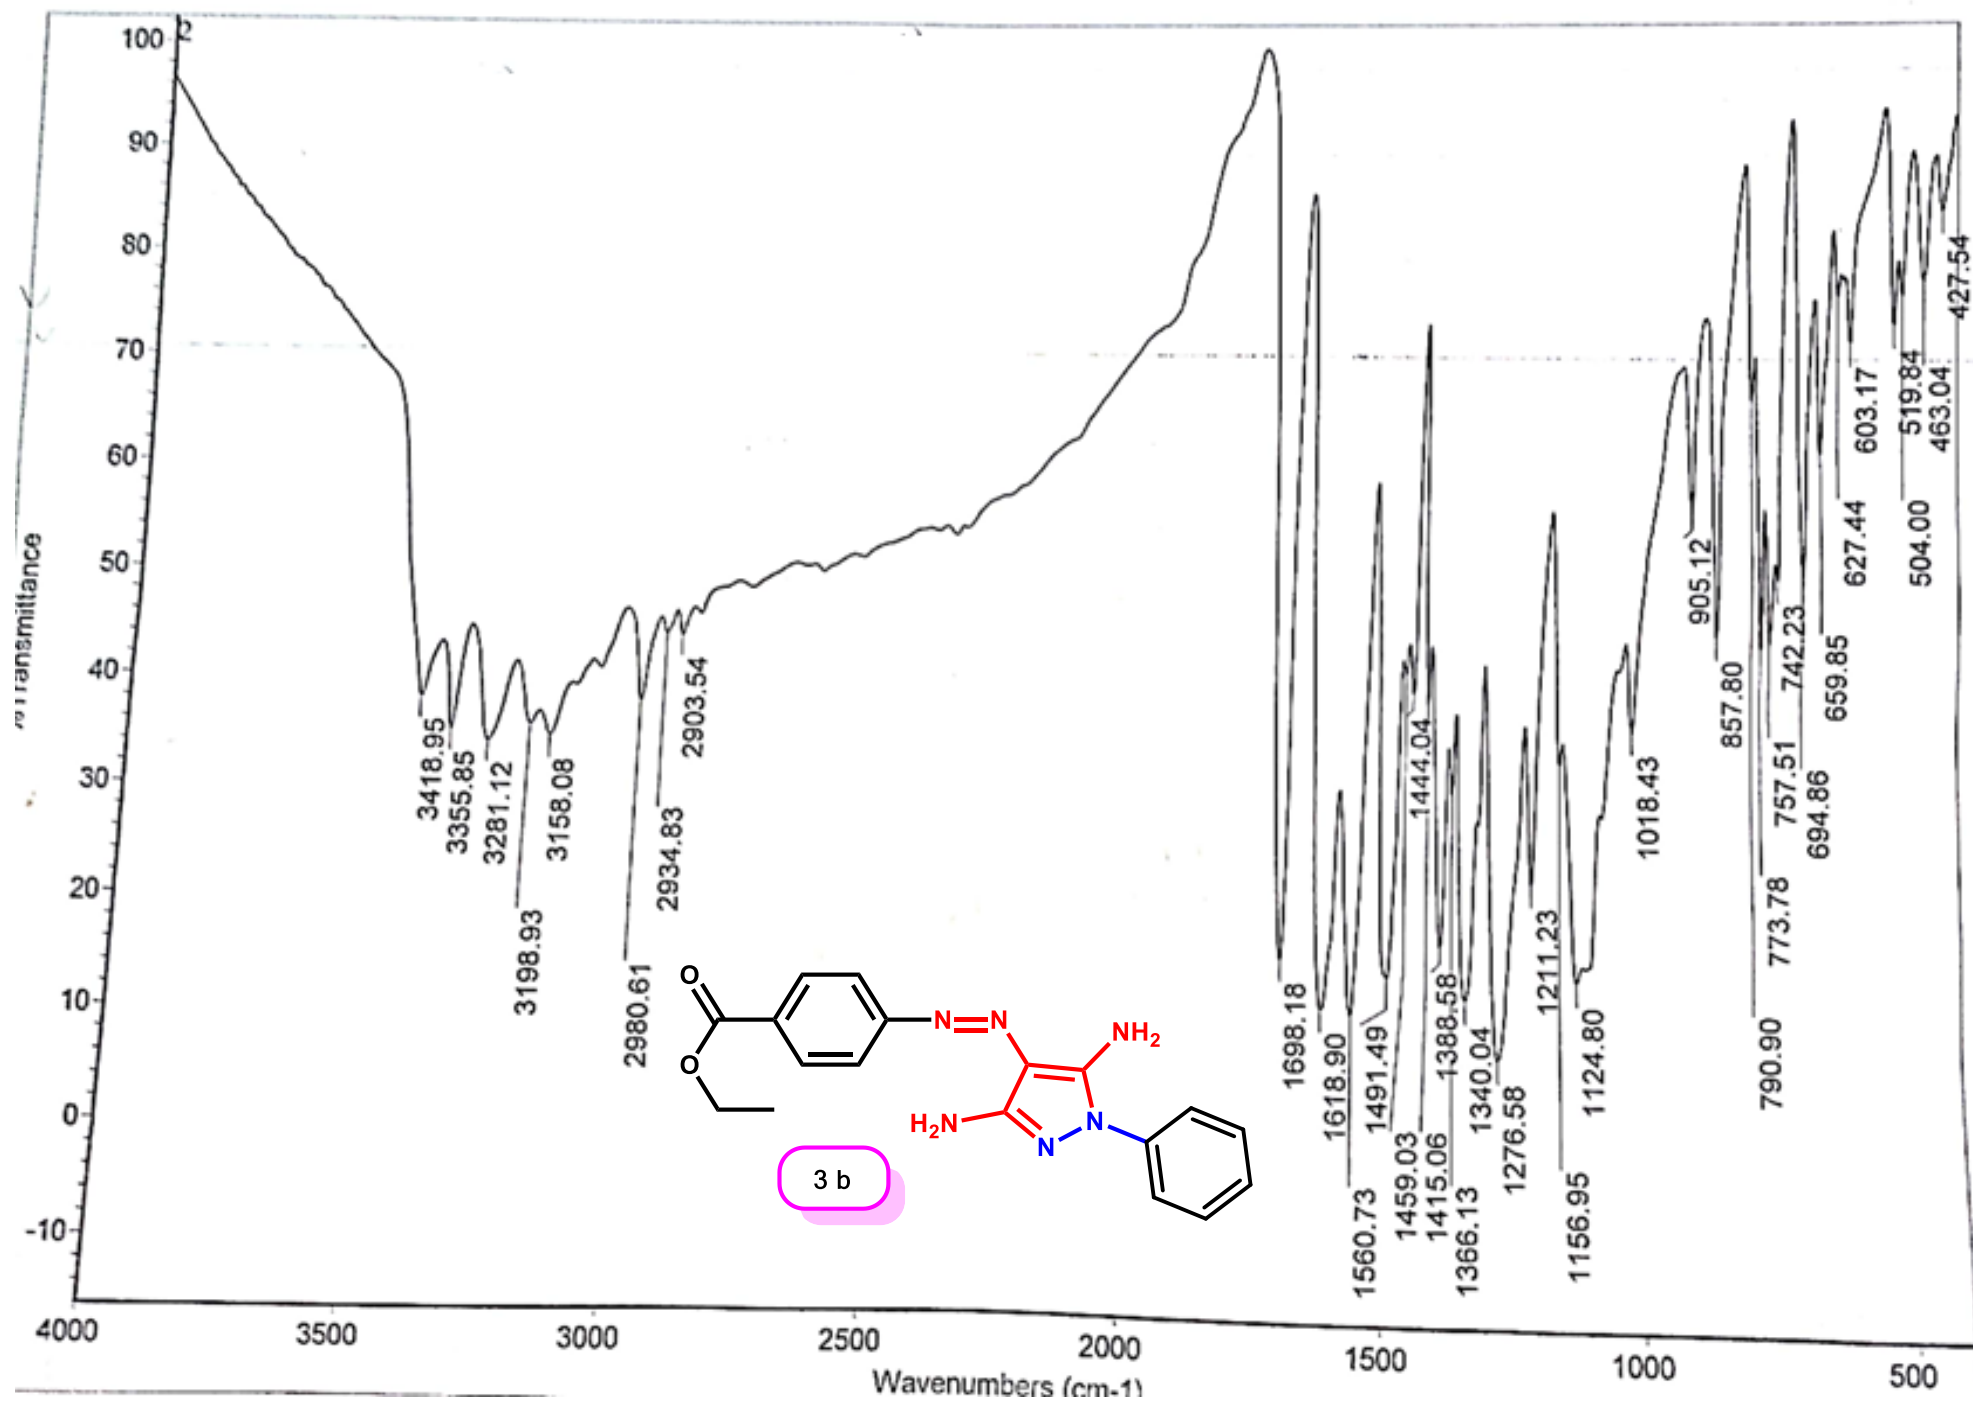

H NMR - DMSO-3b

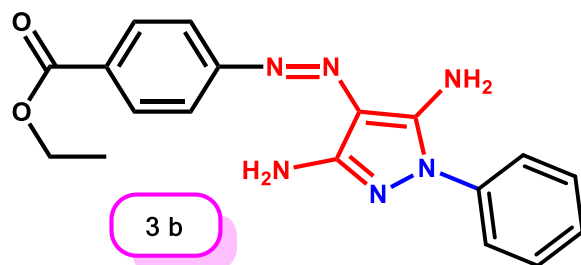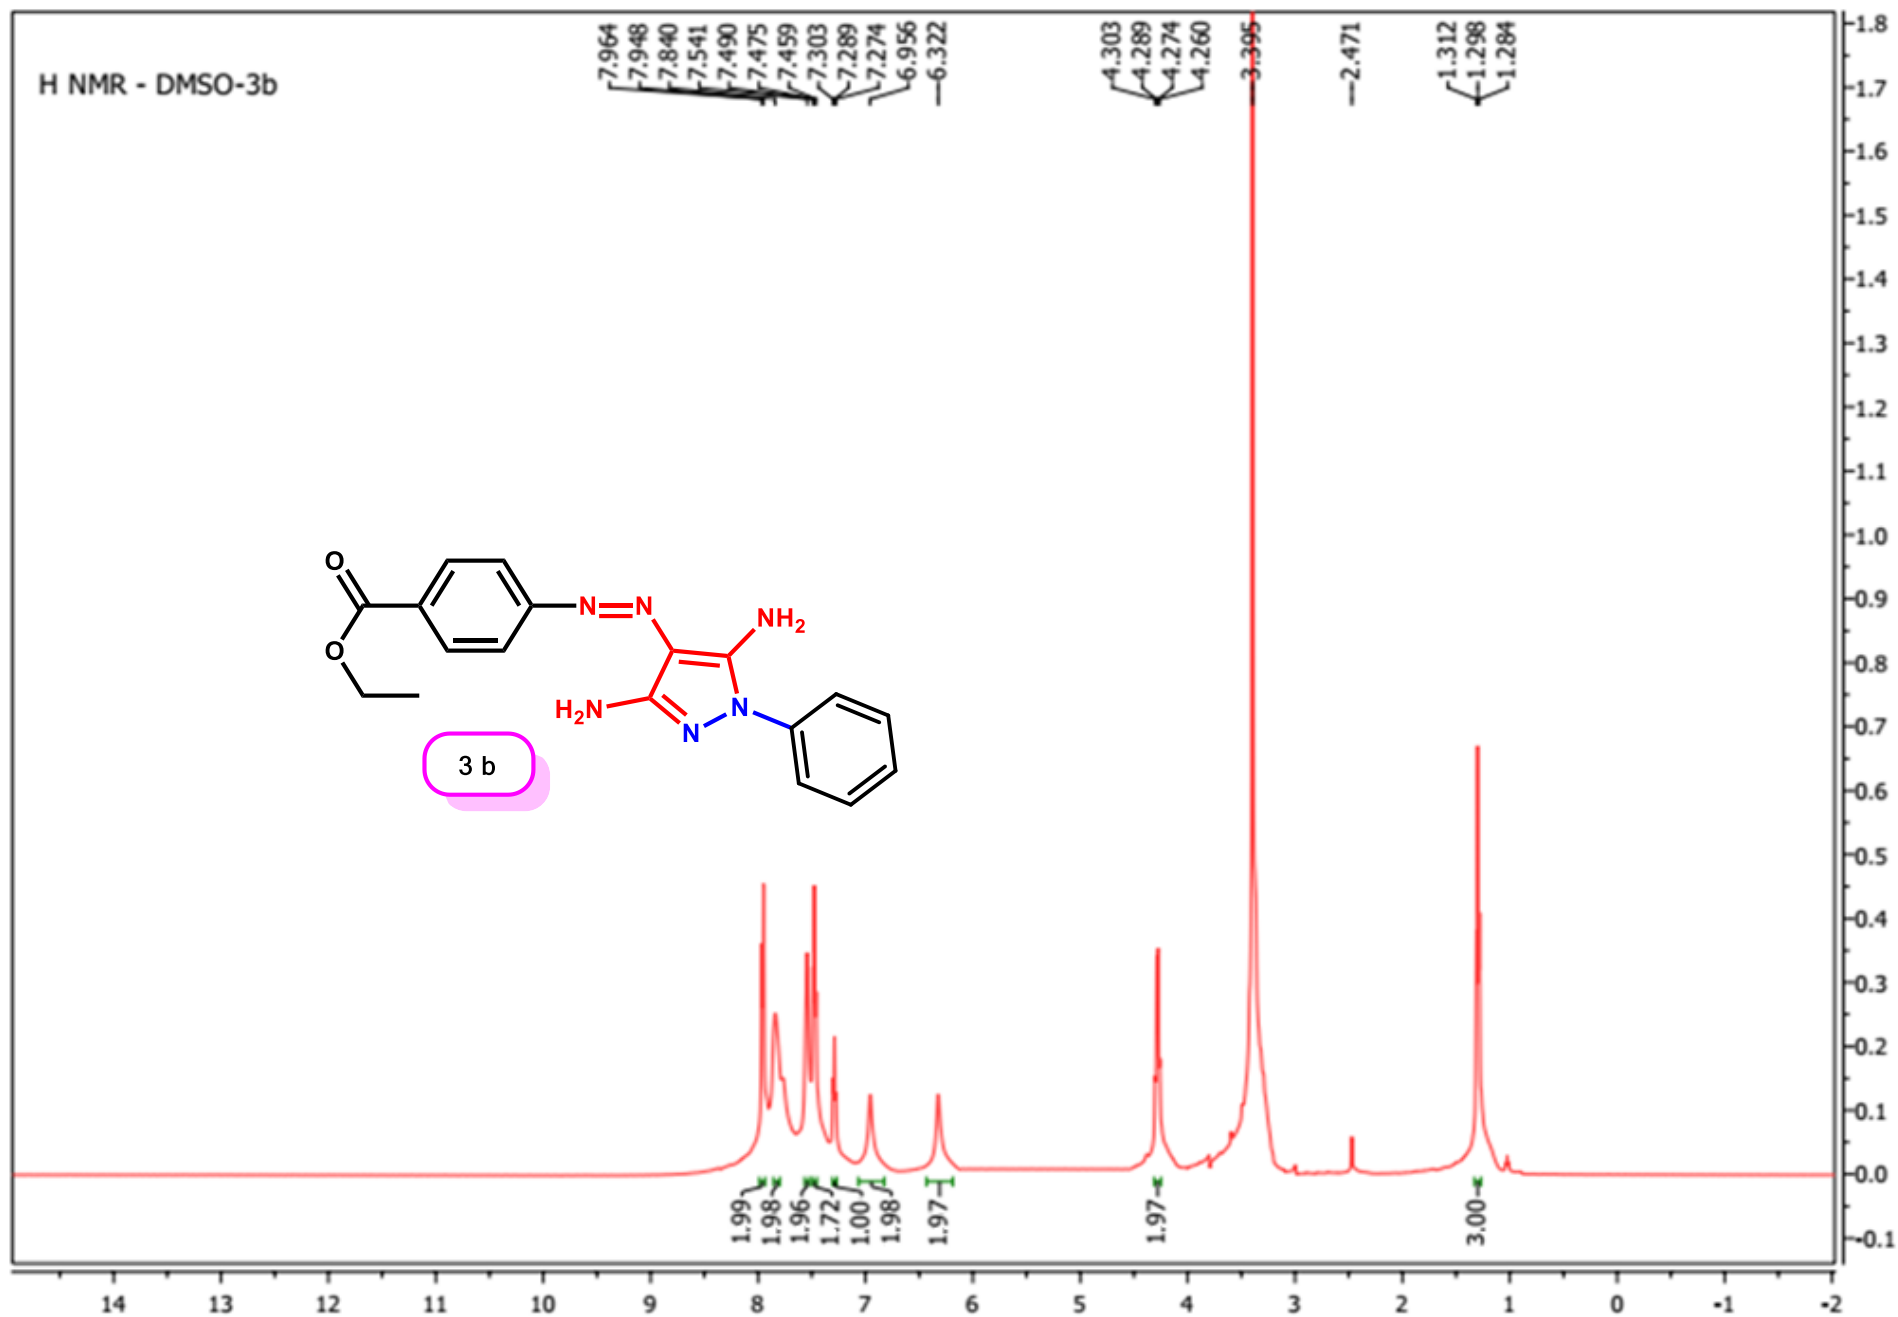

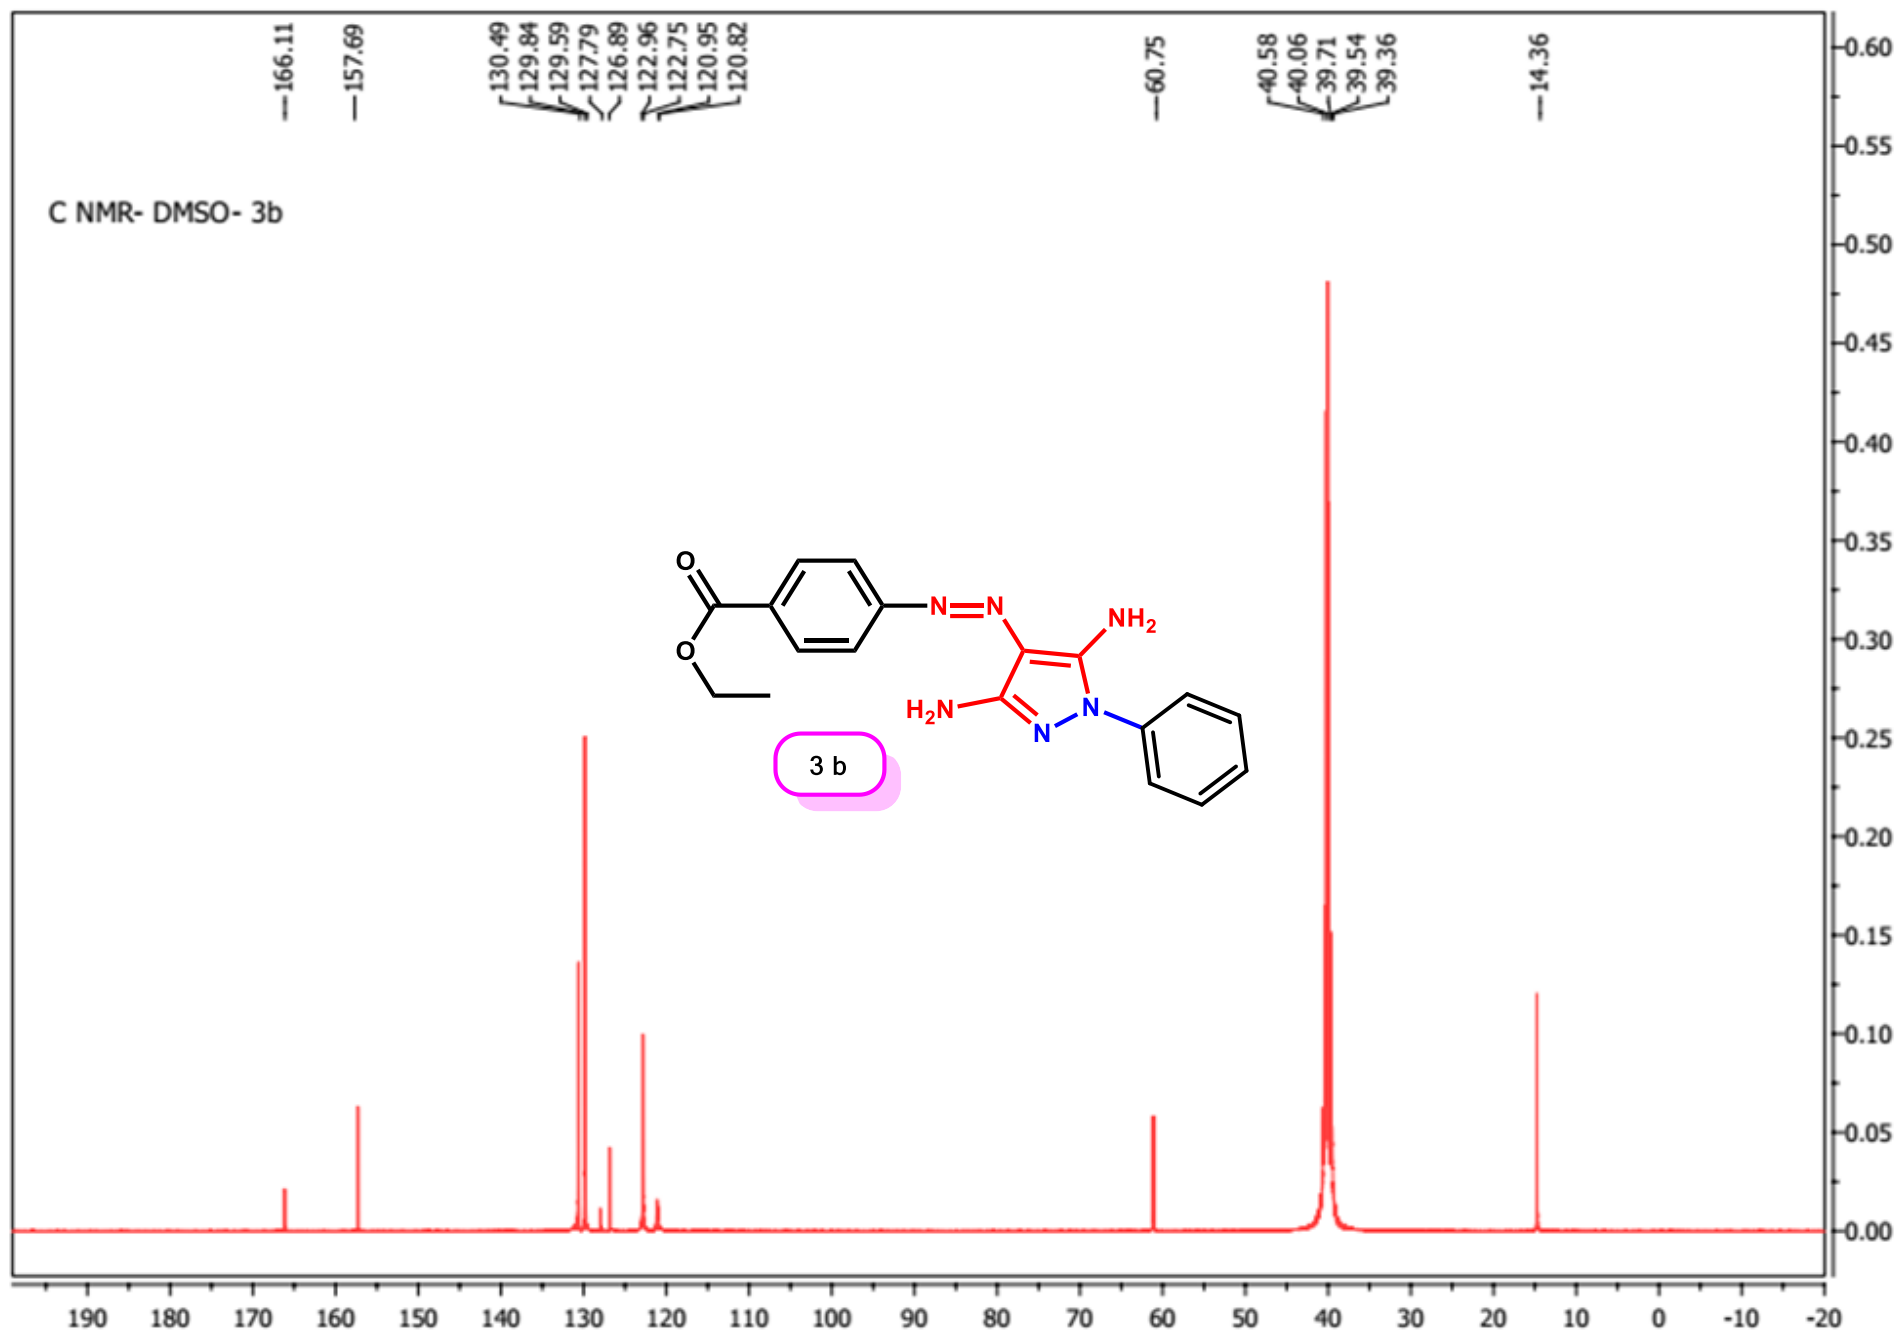

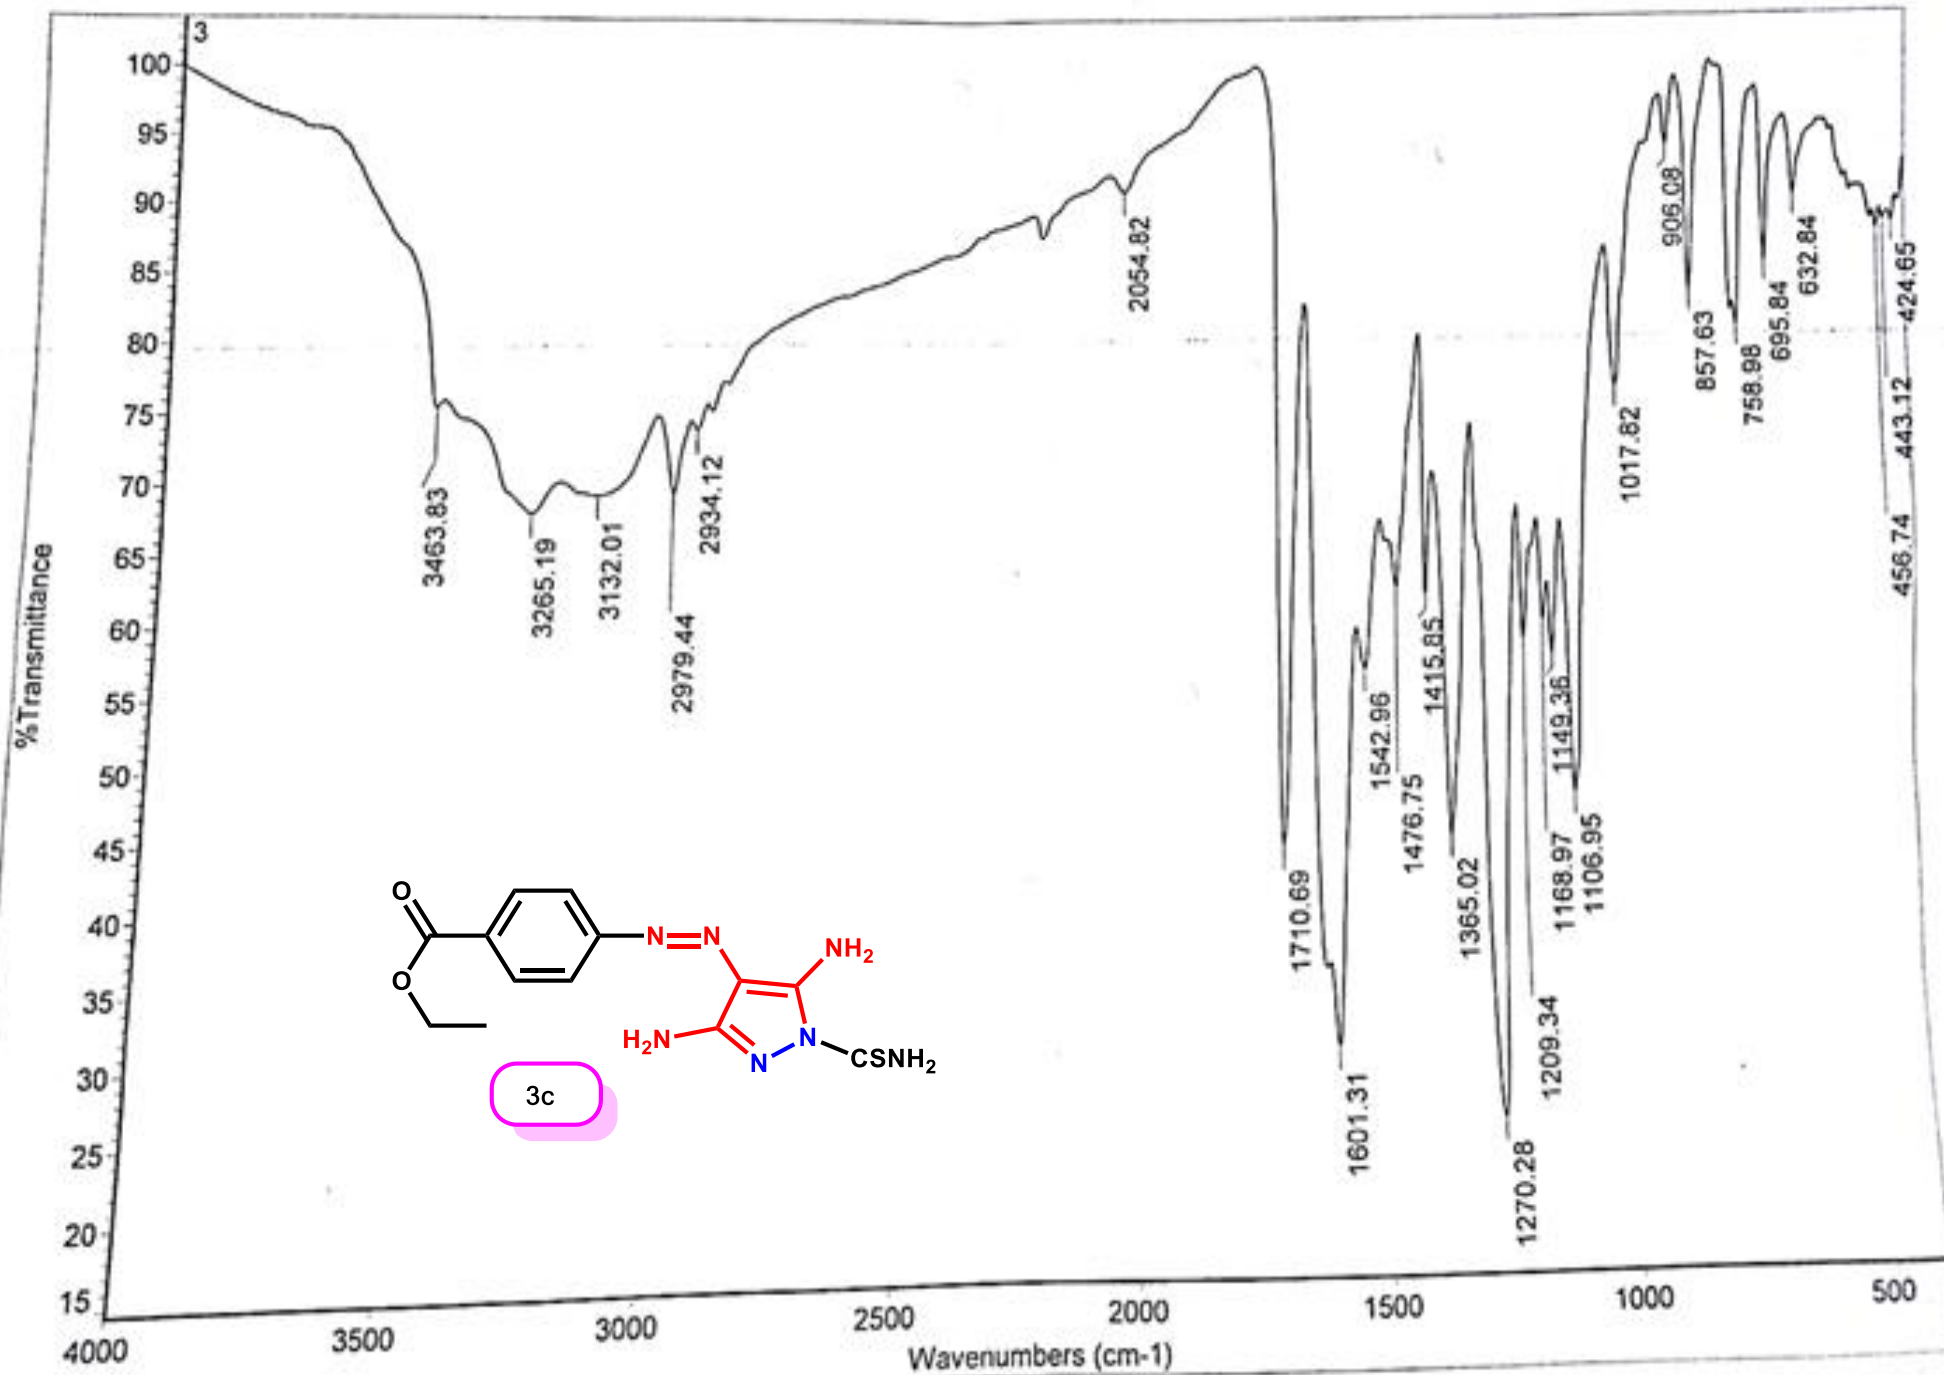

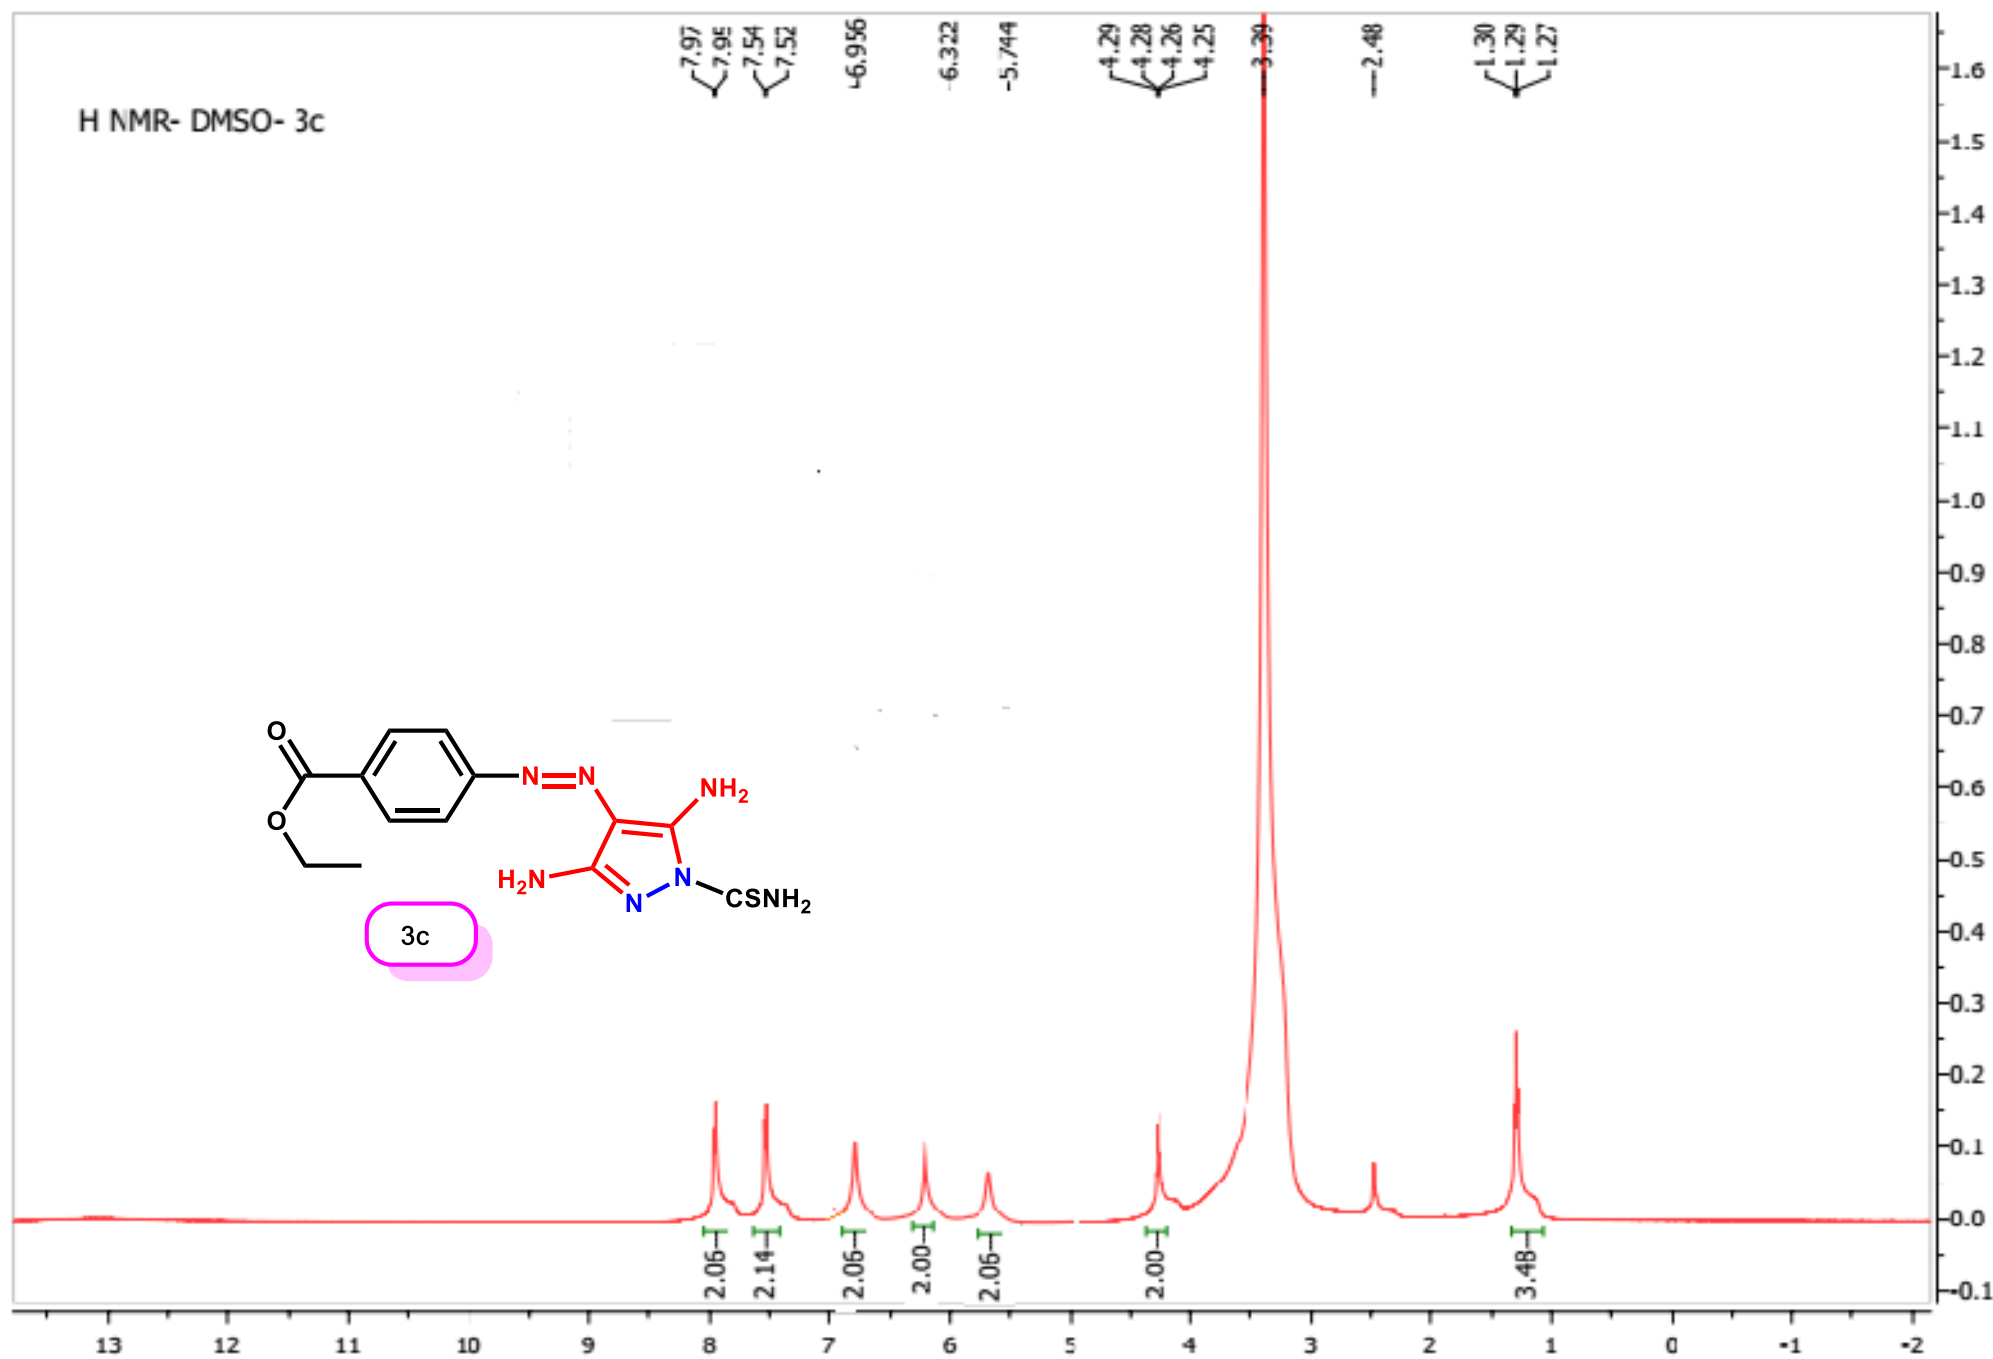

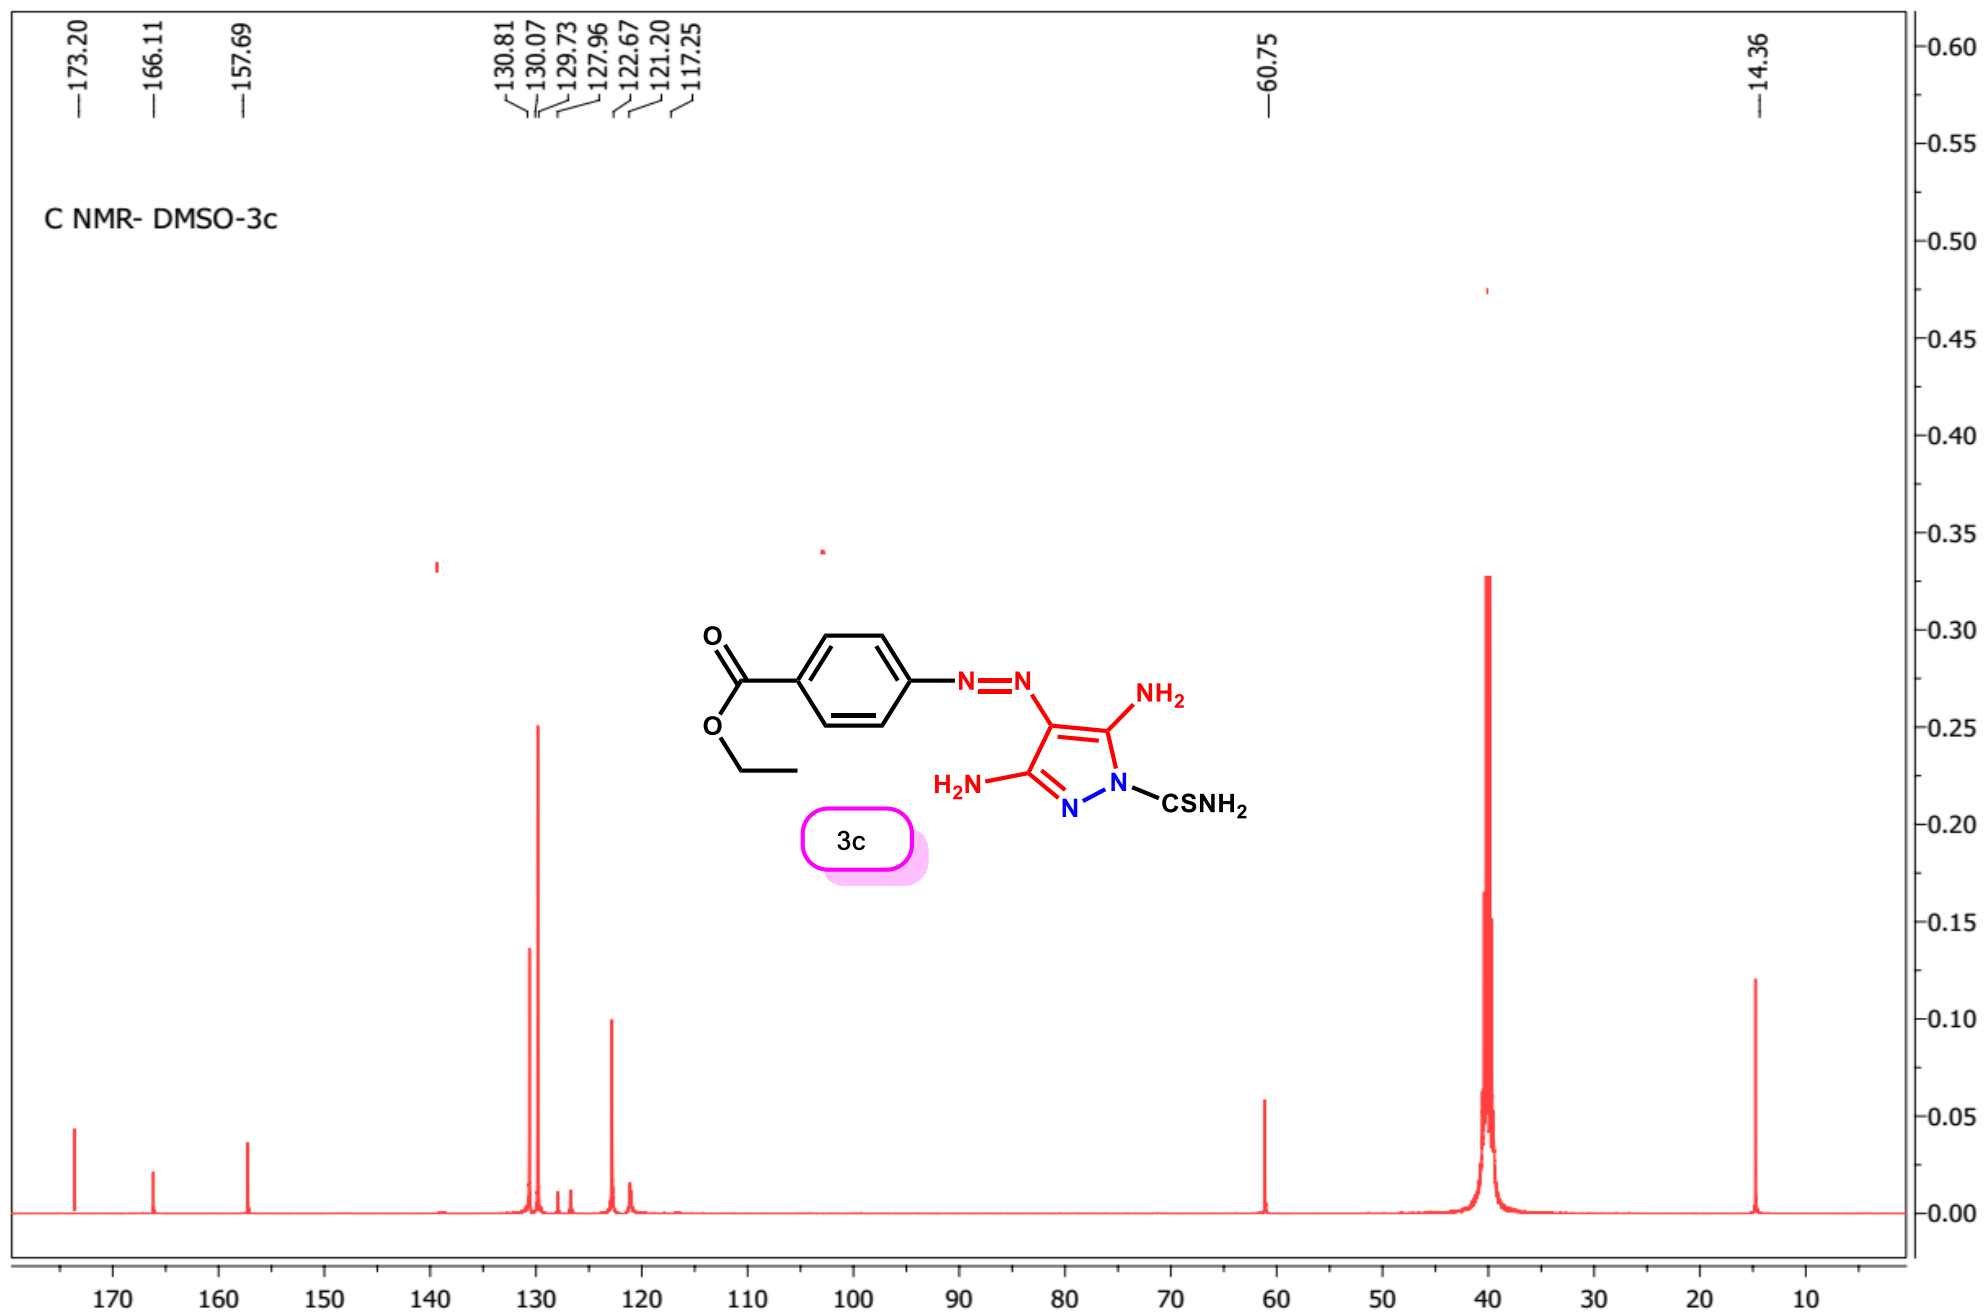

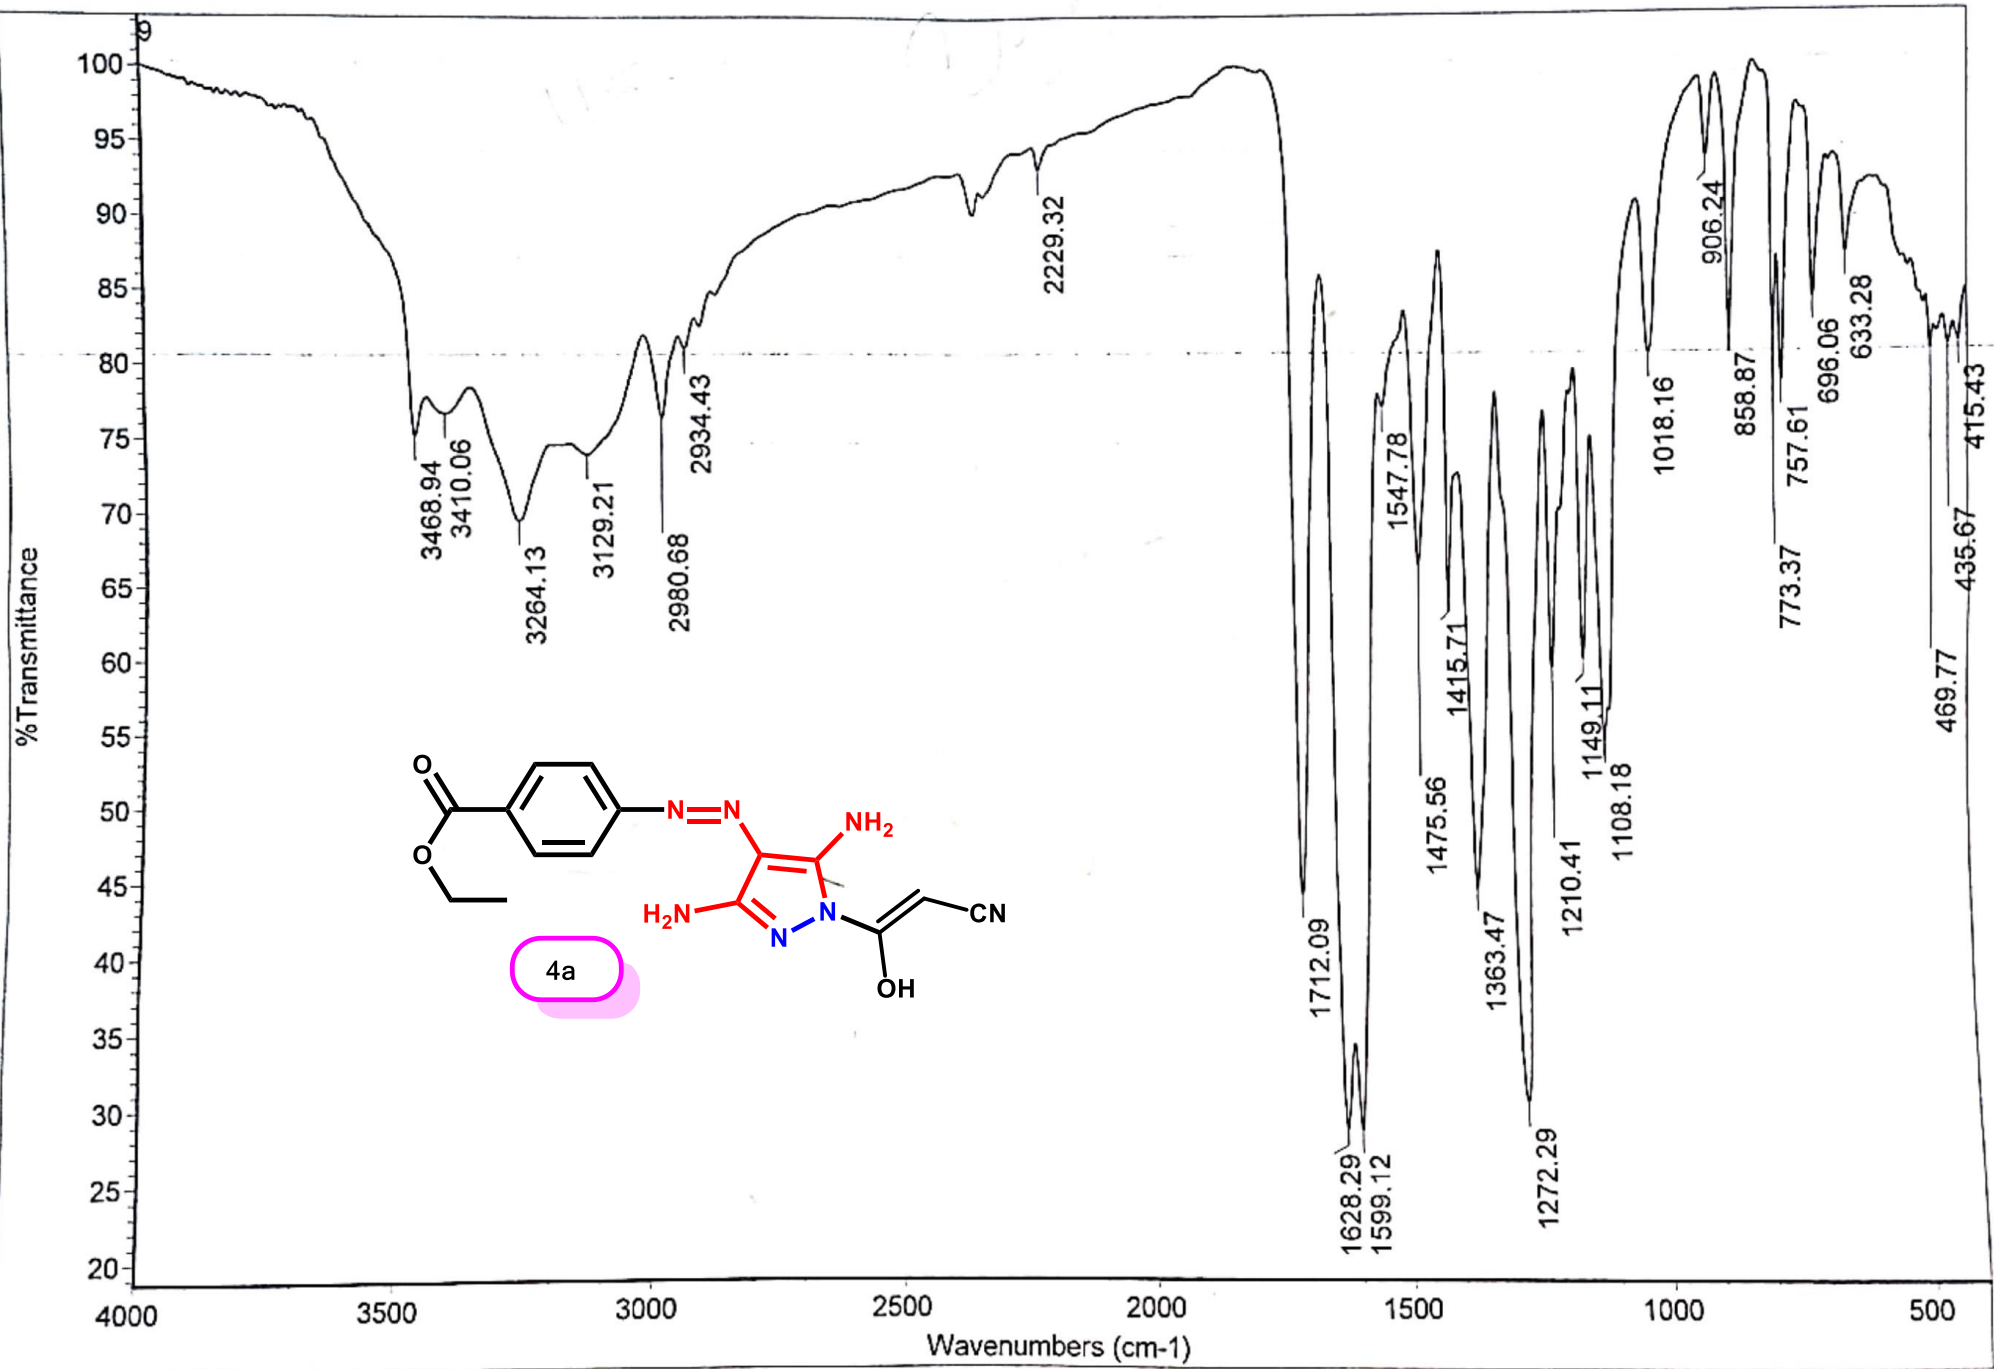

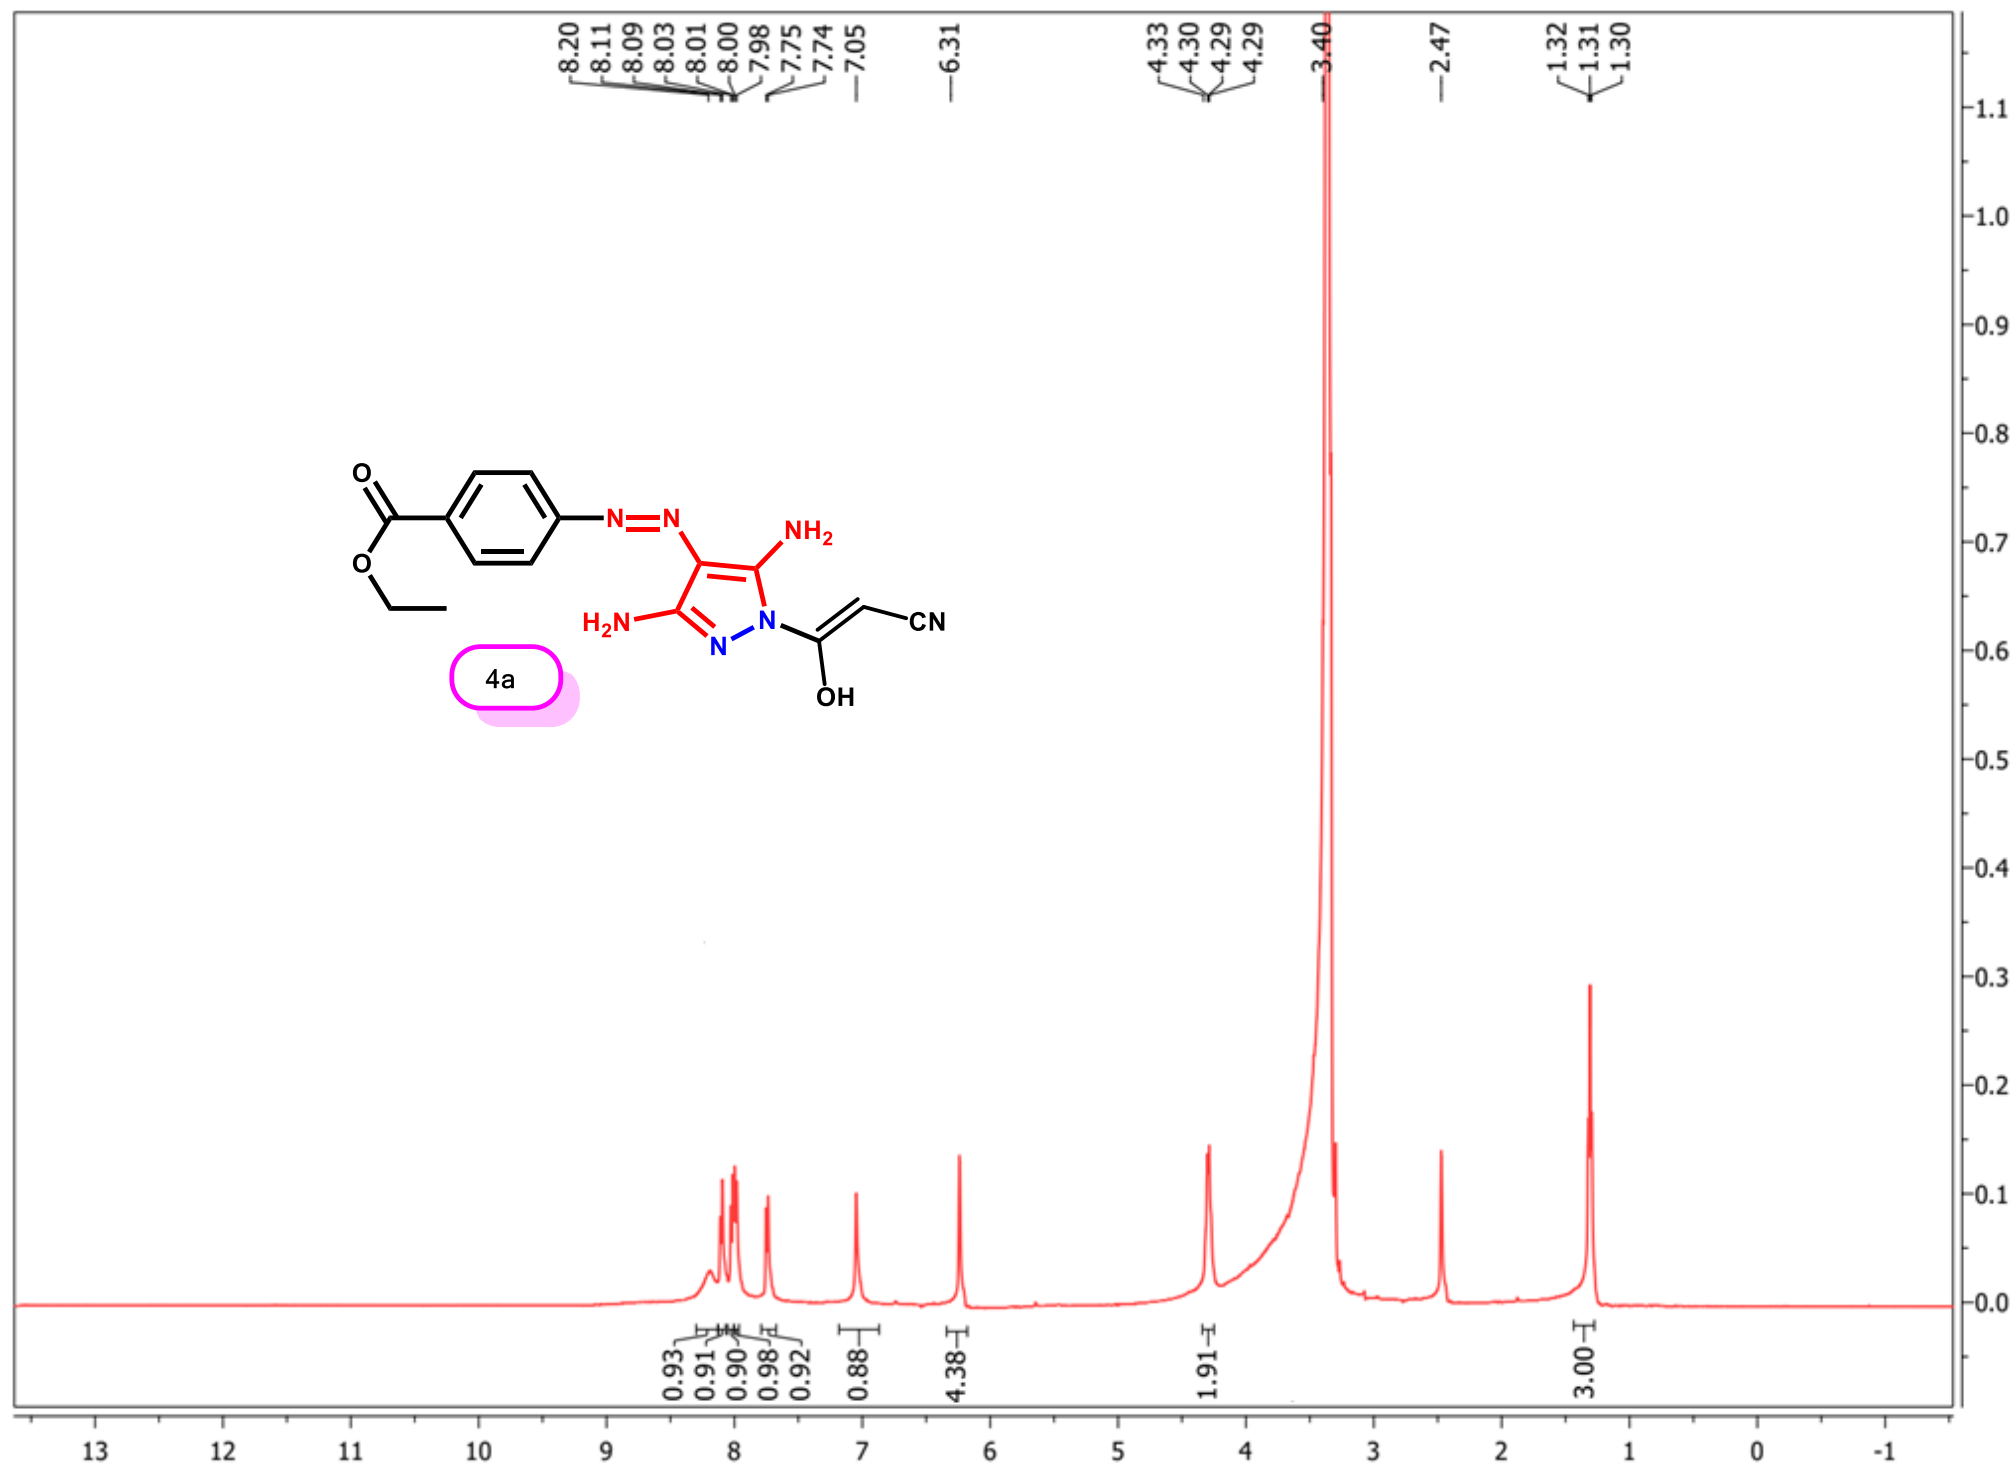

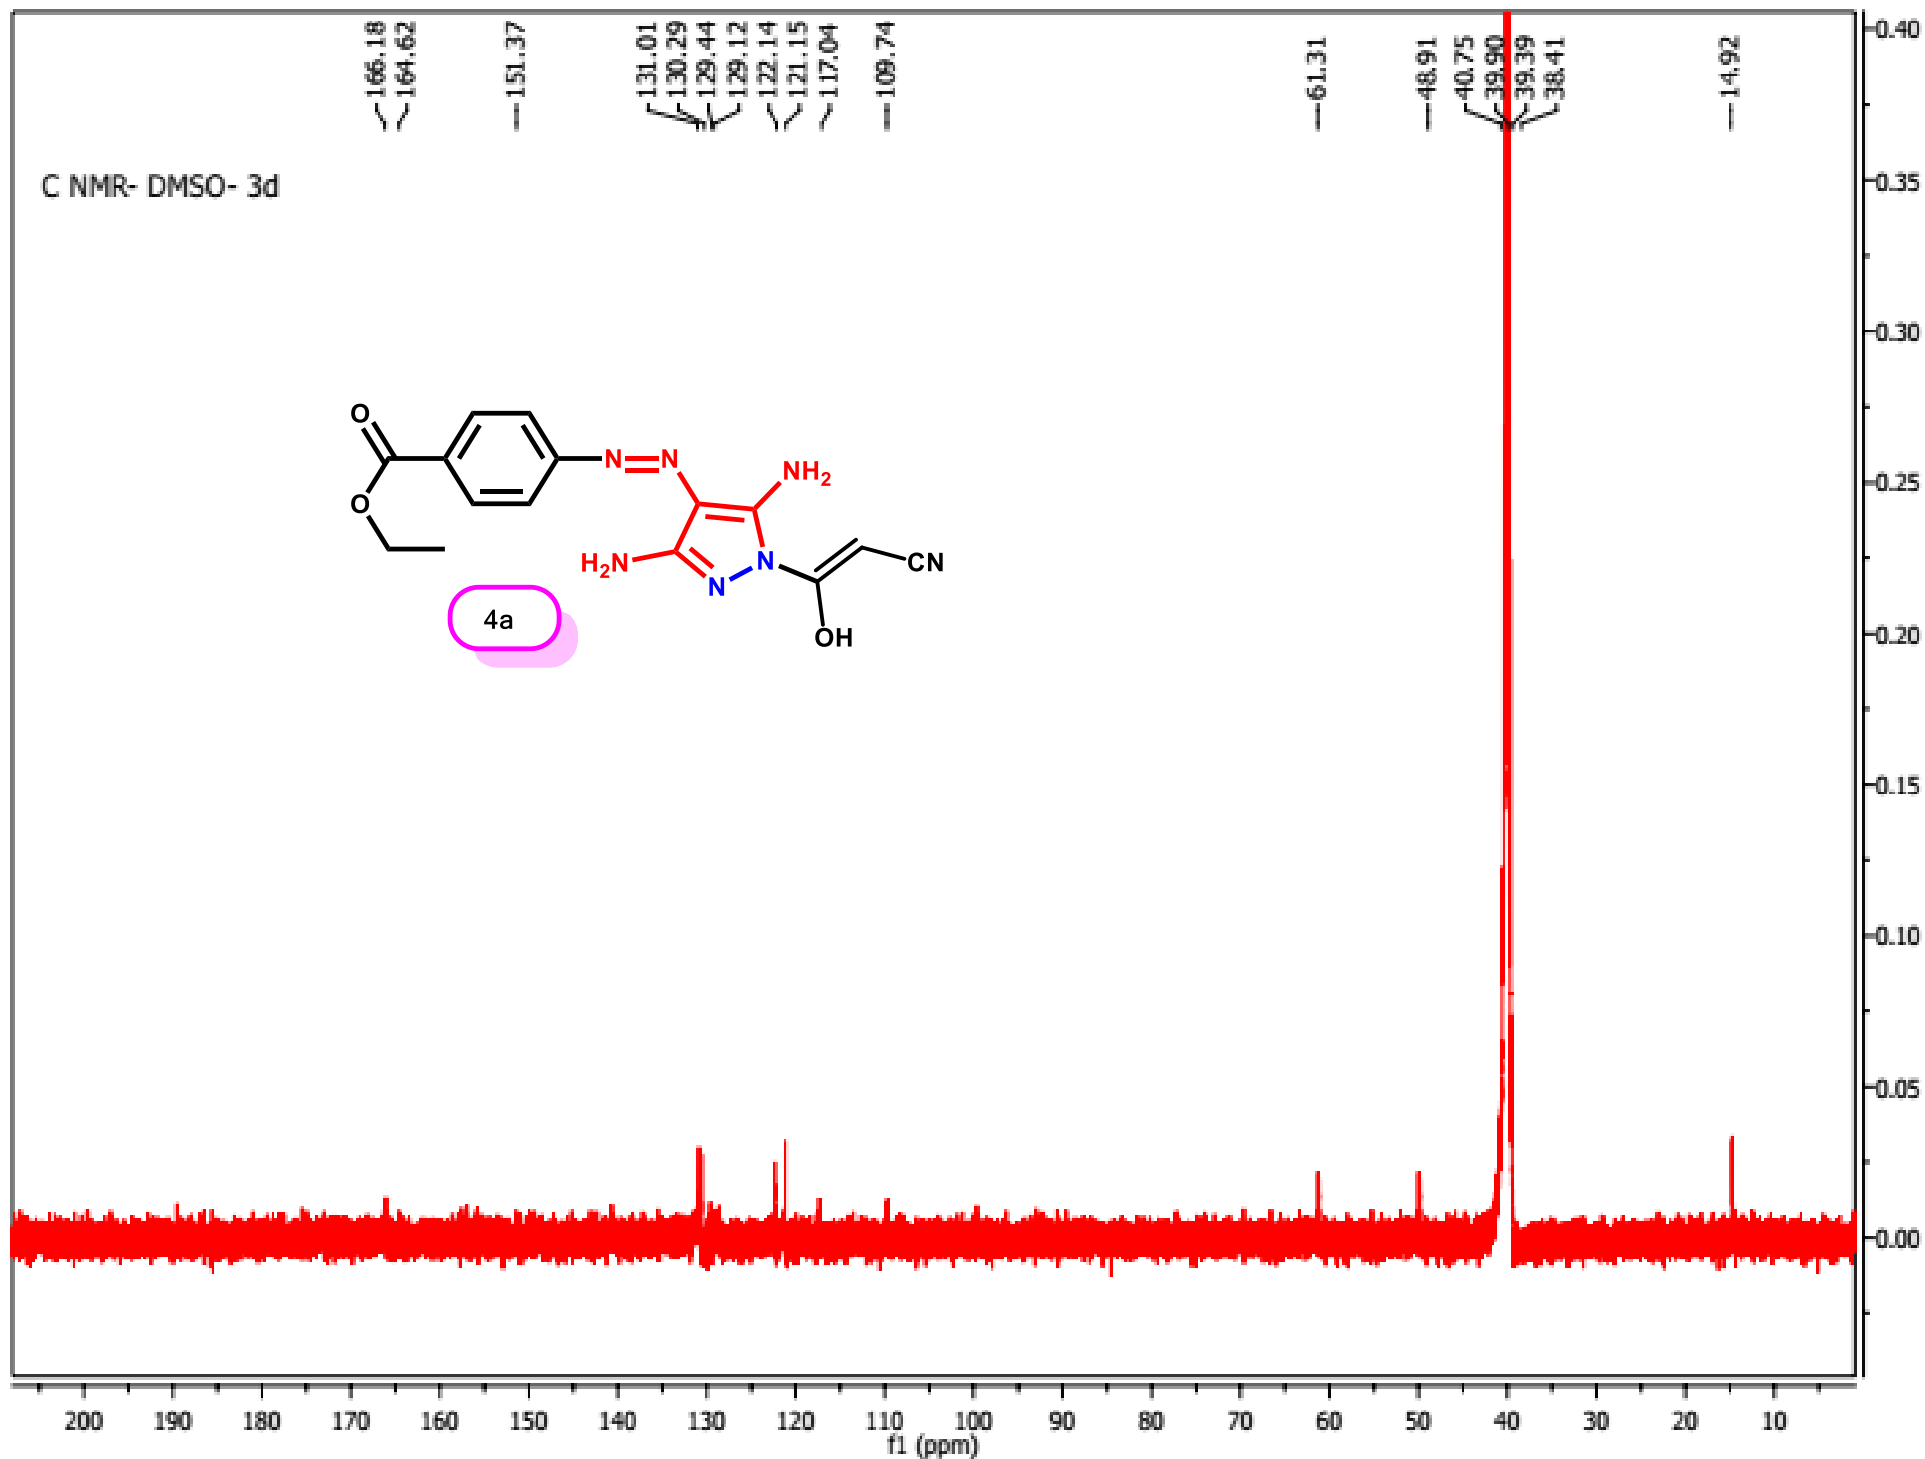

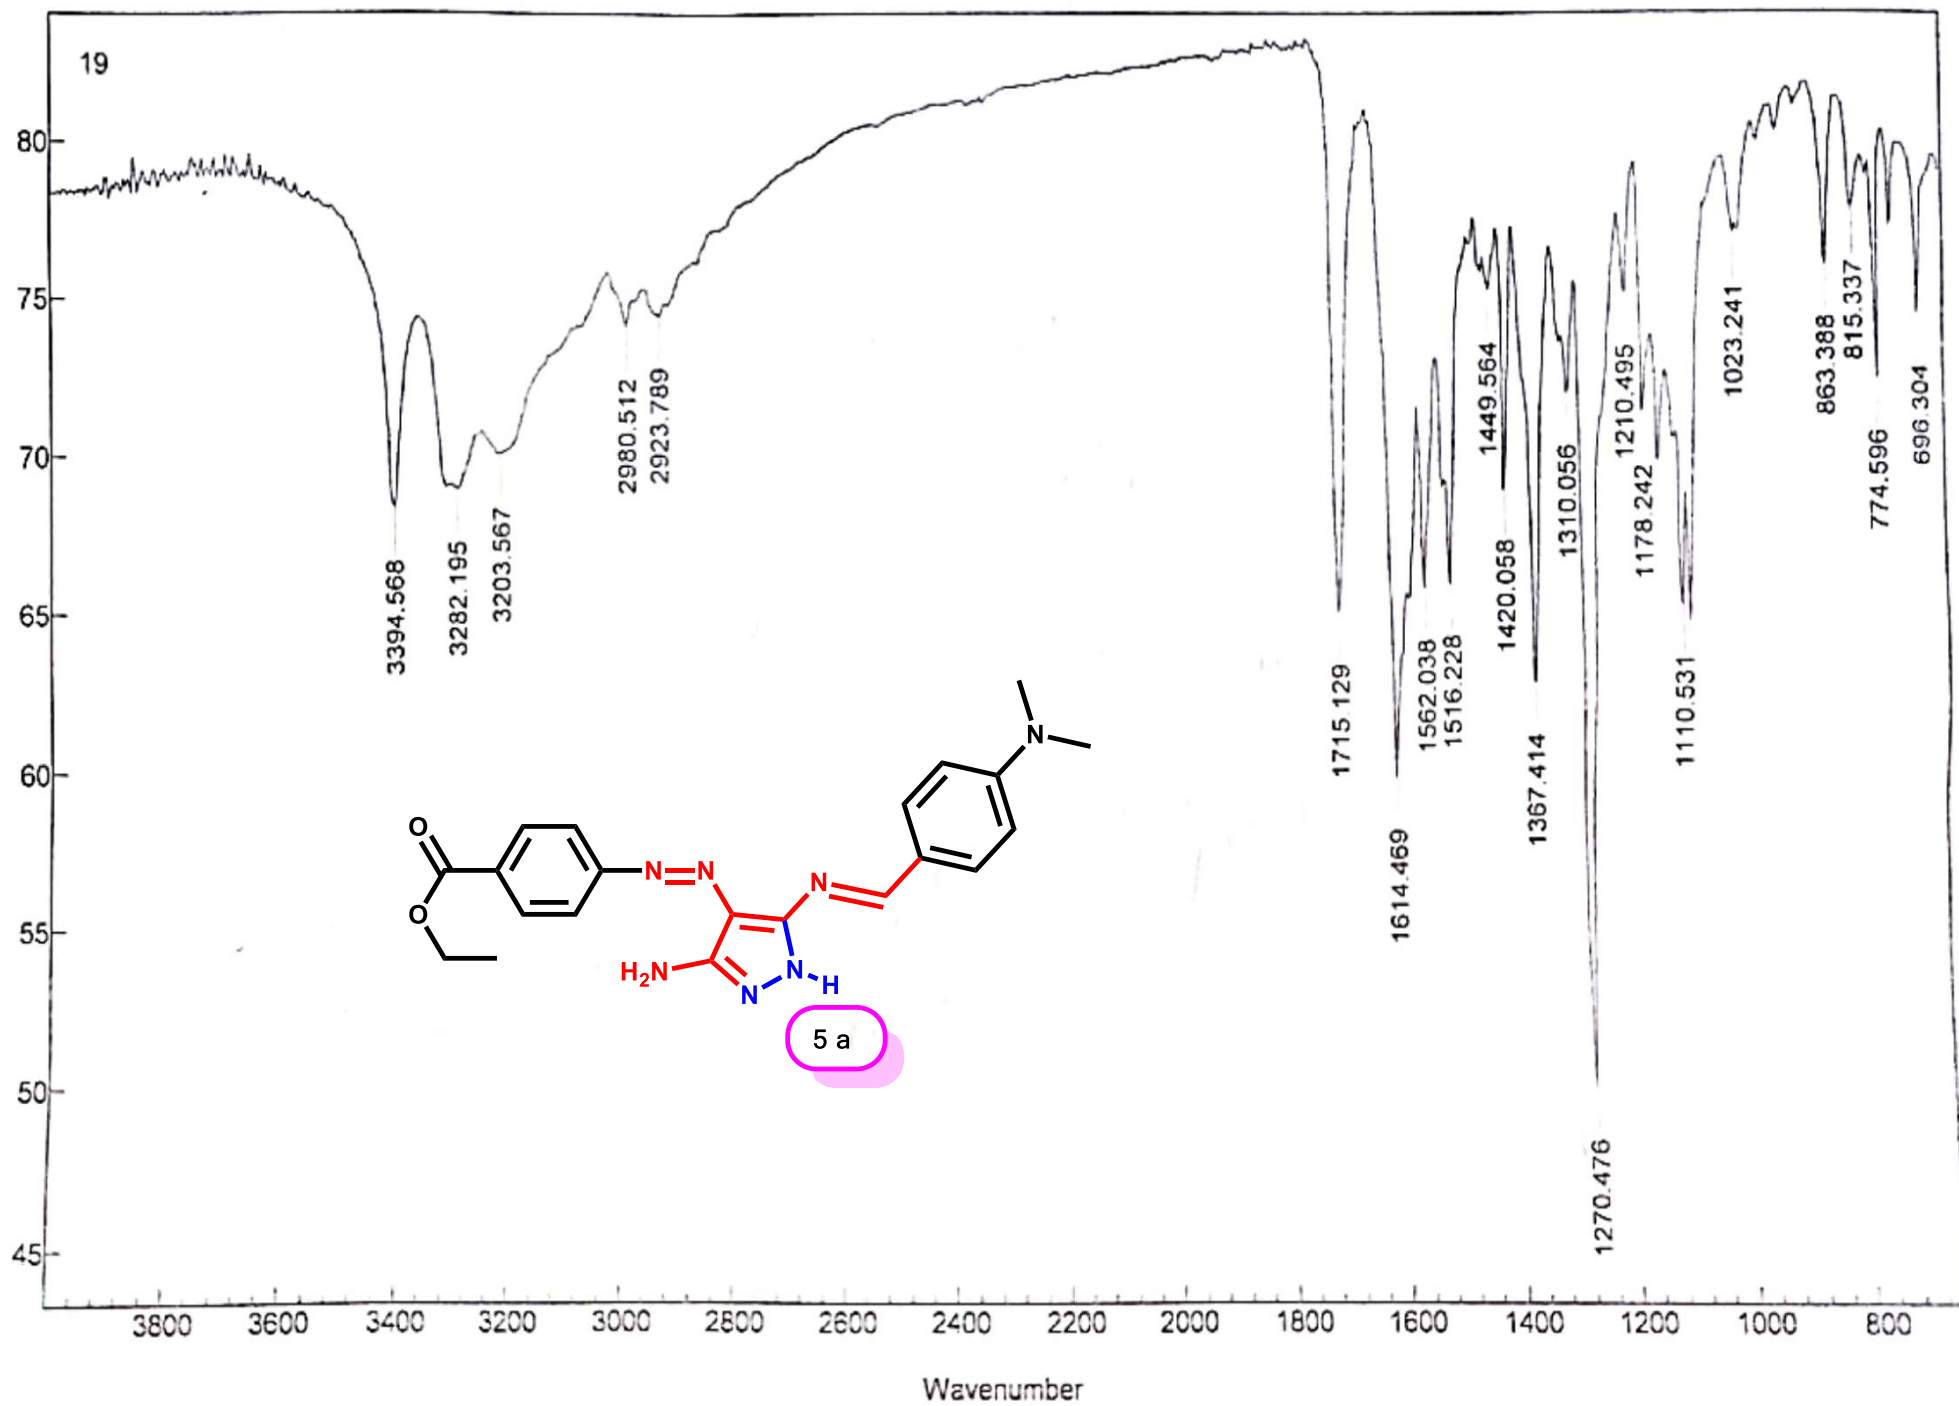

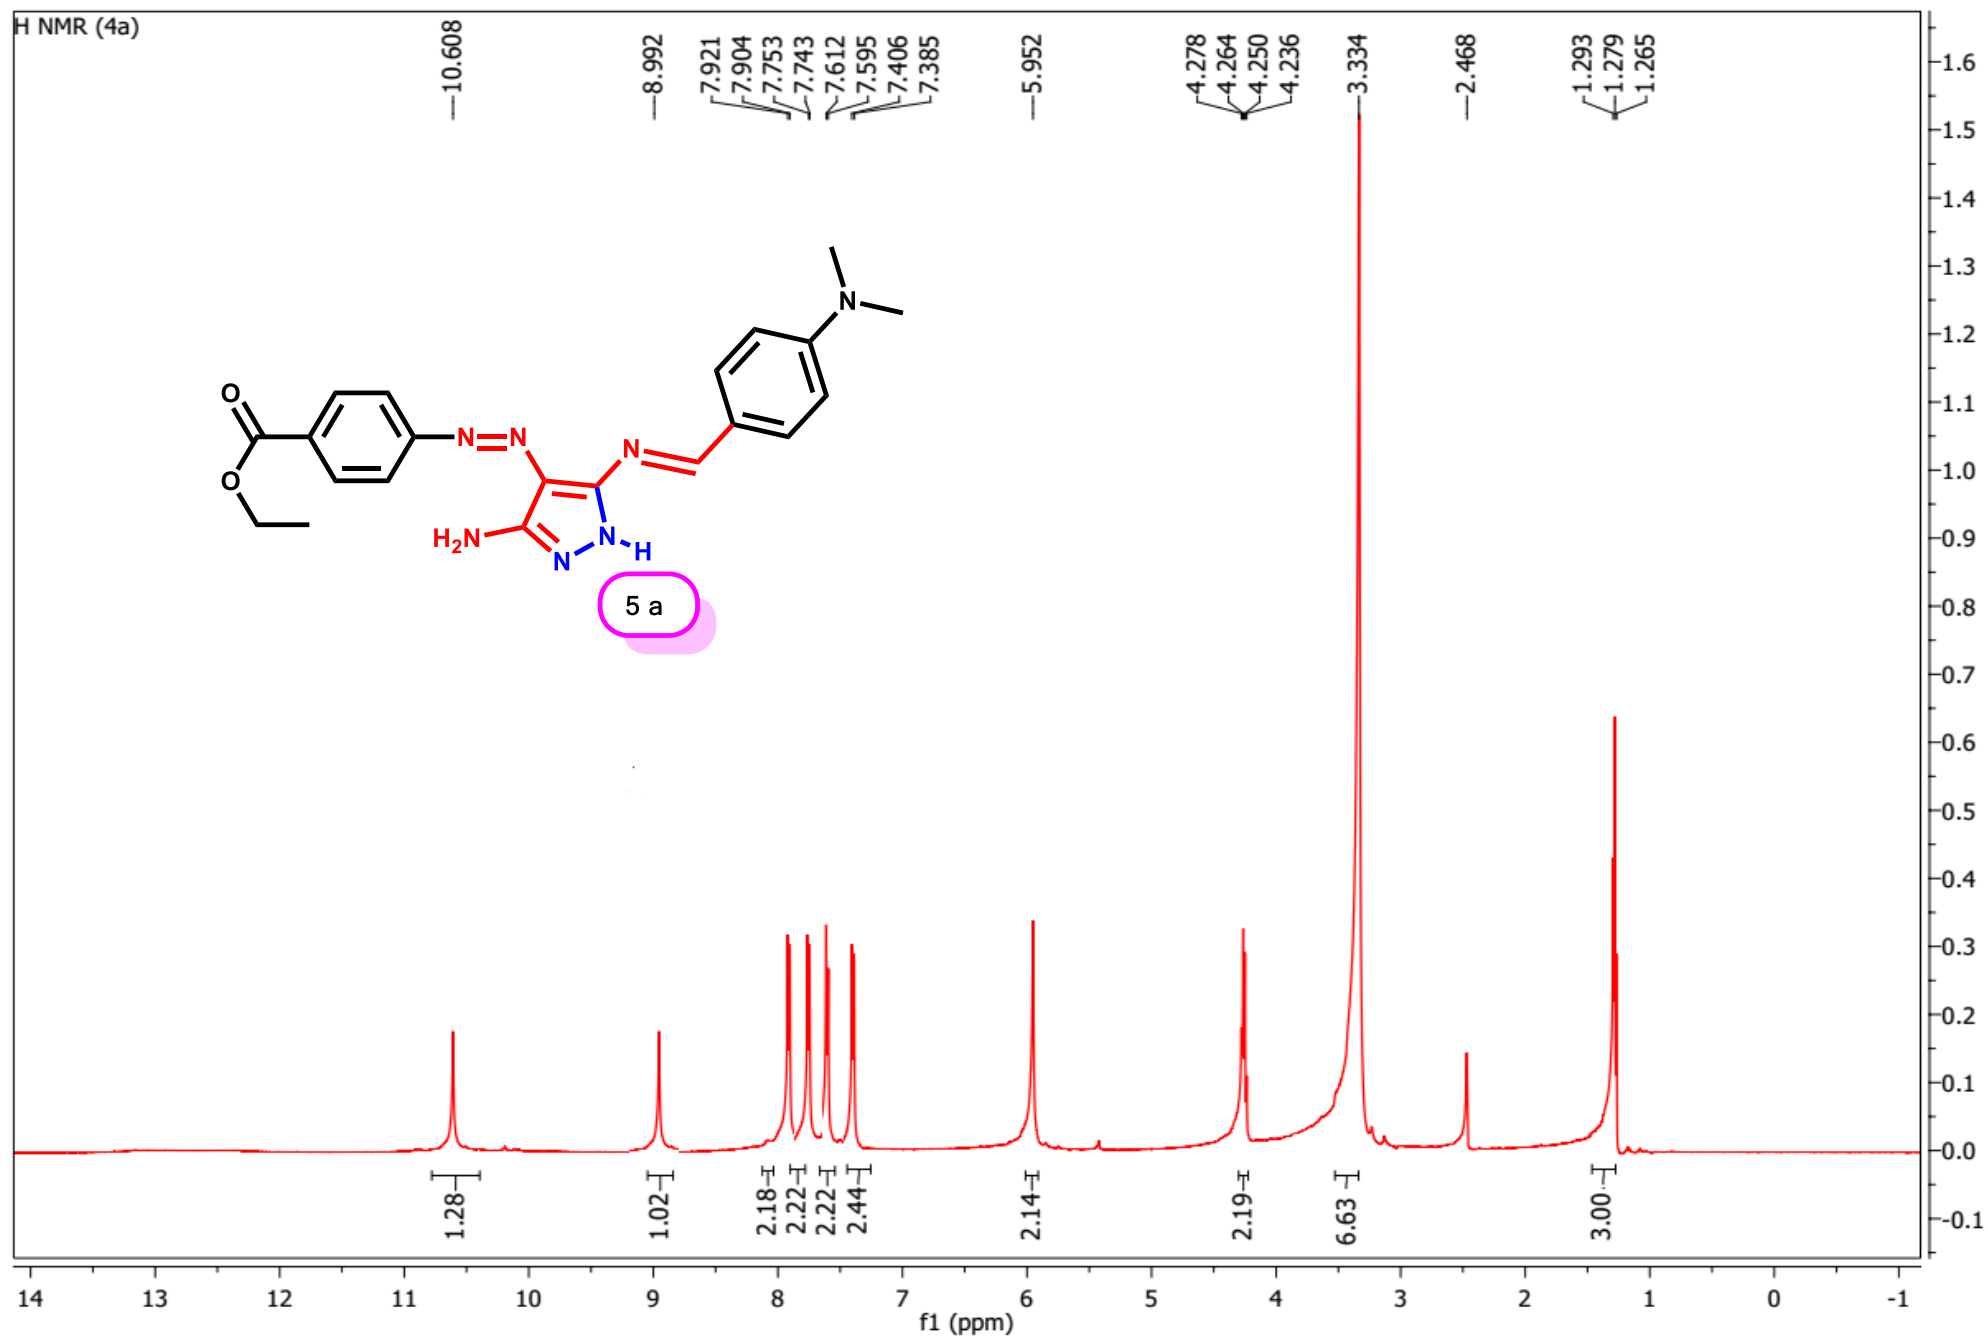

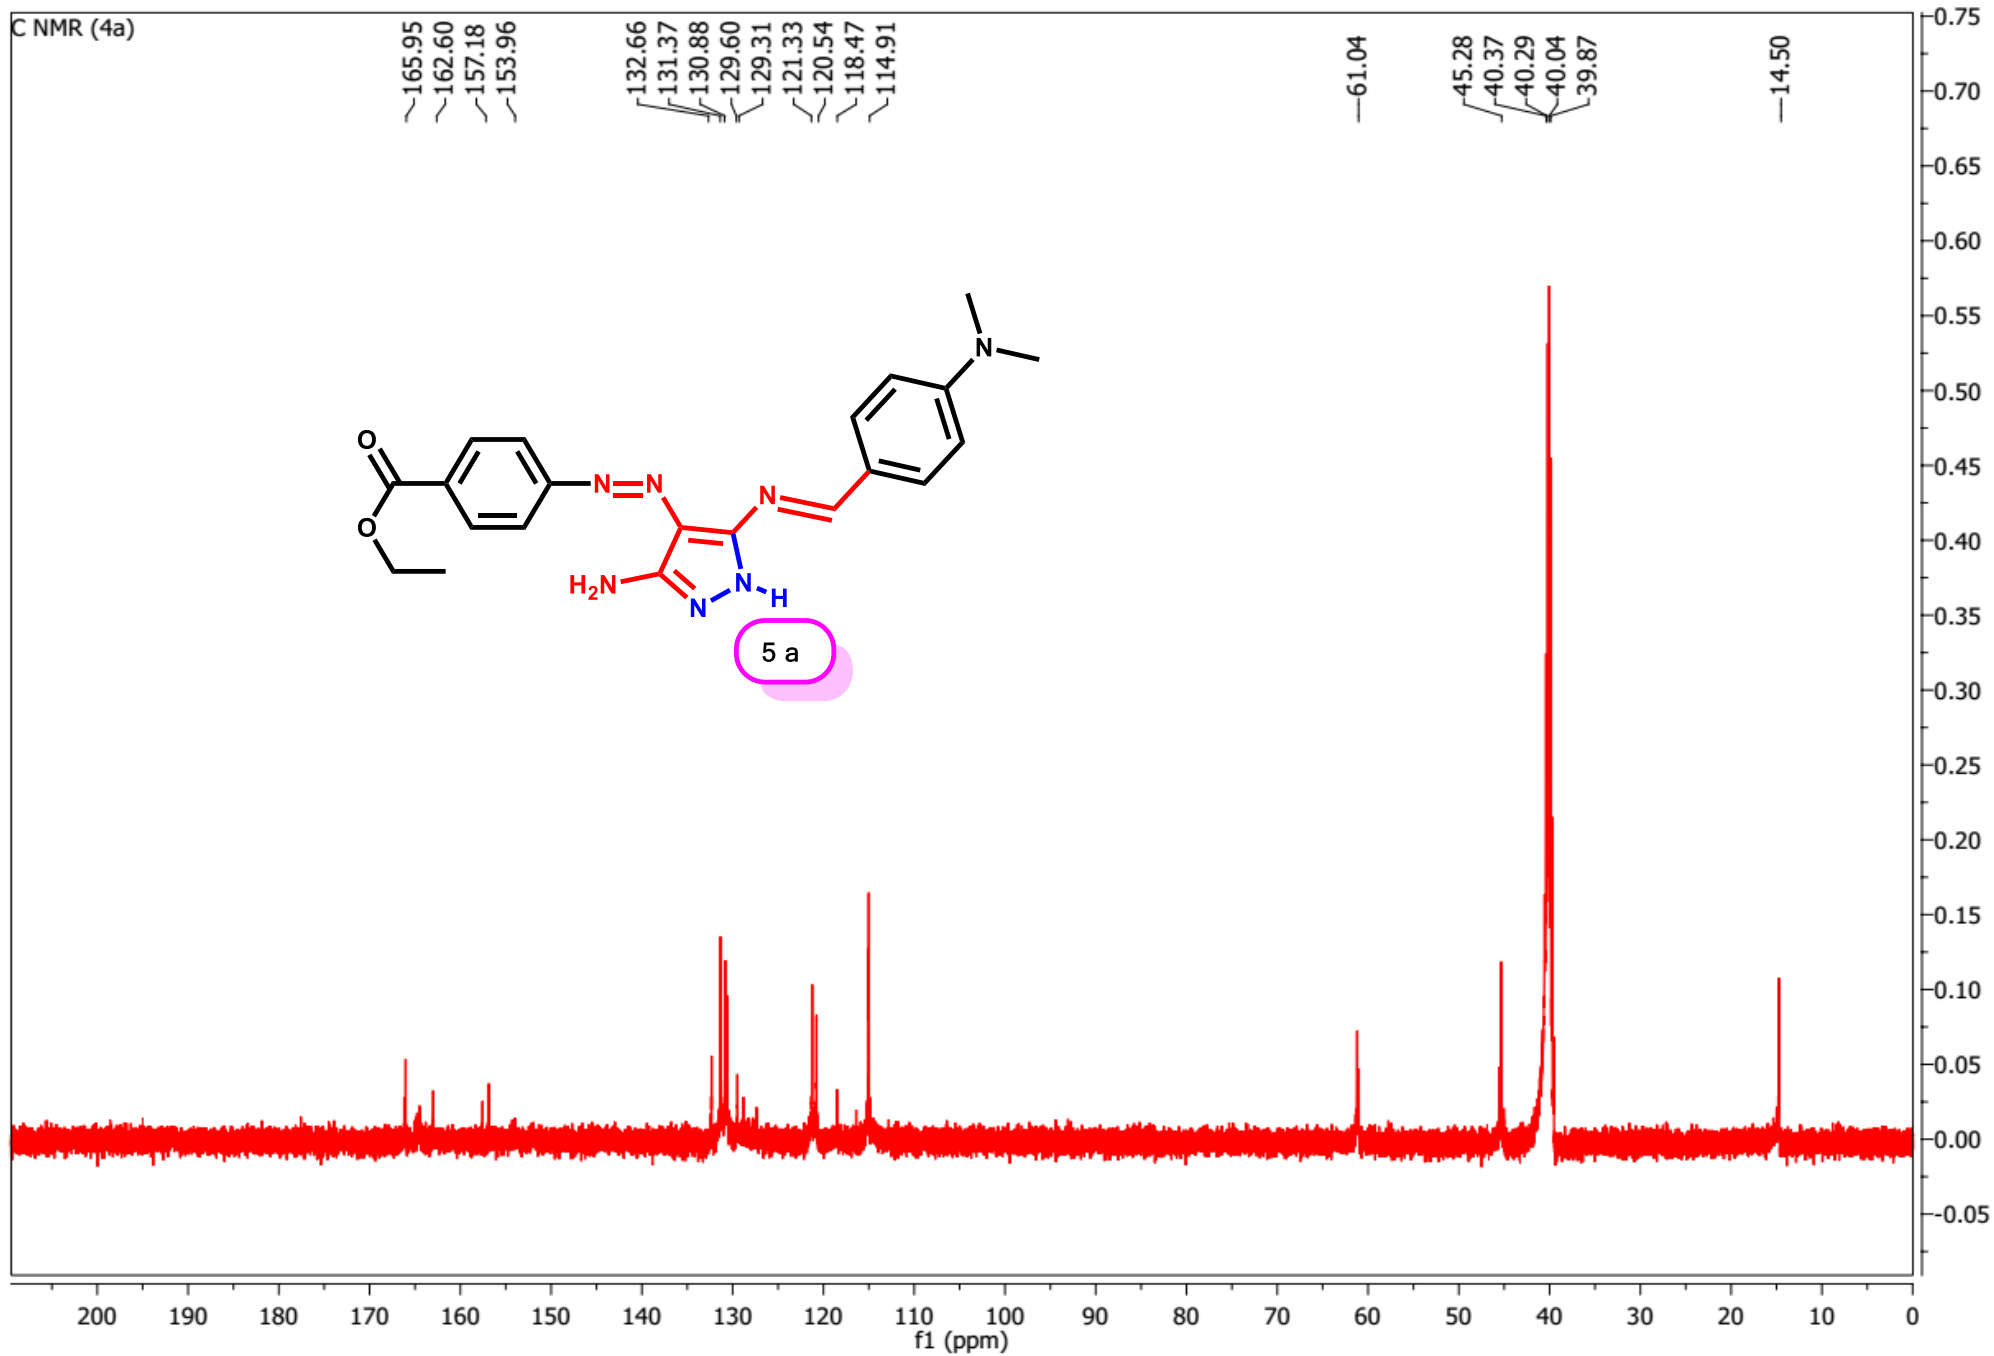

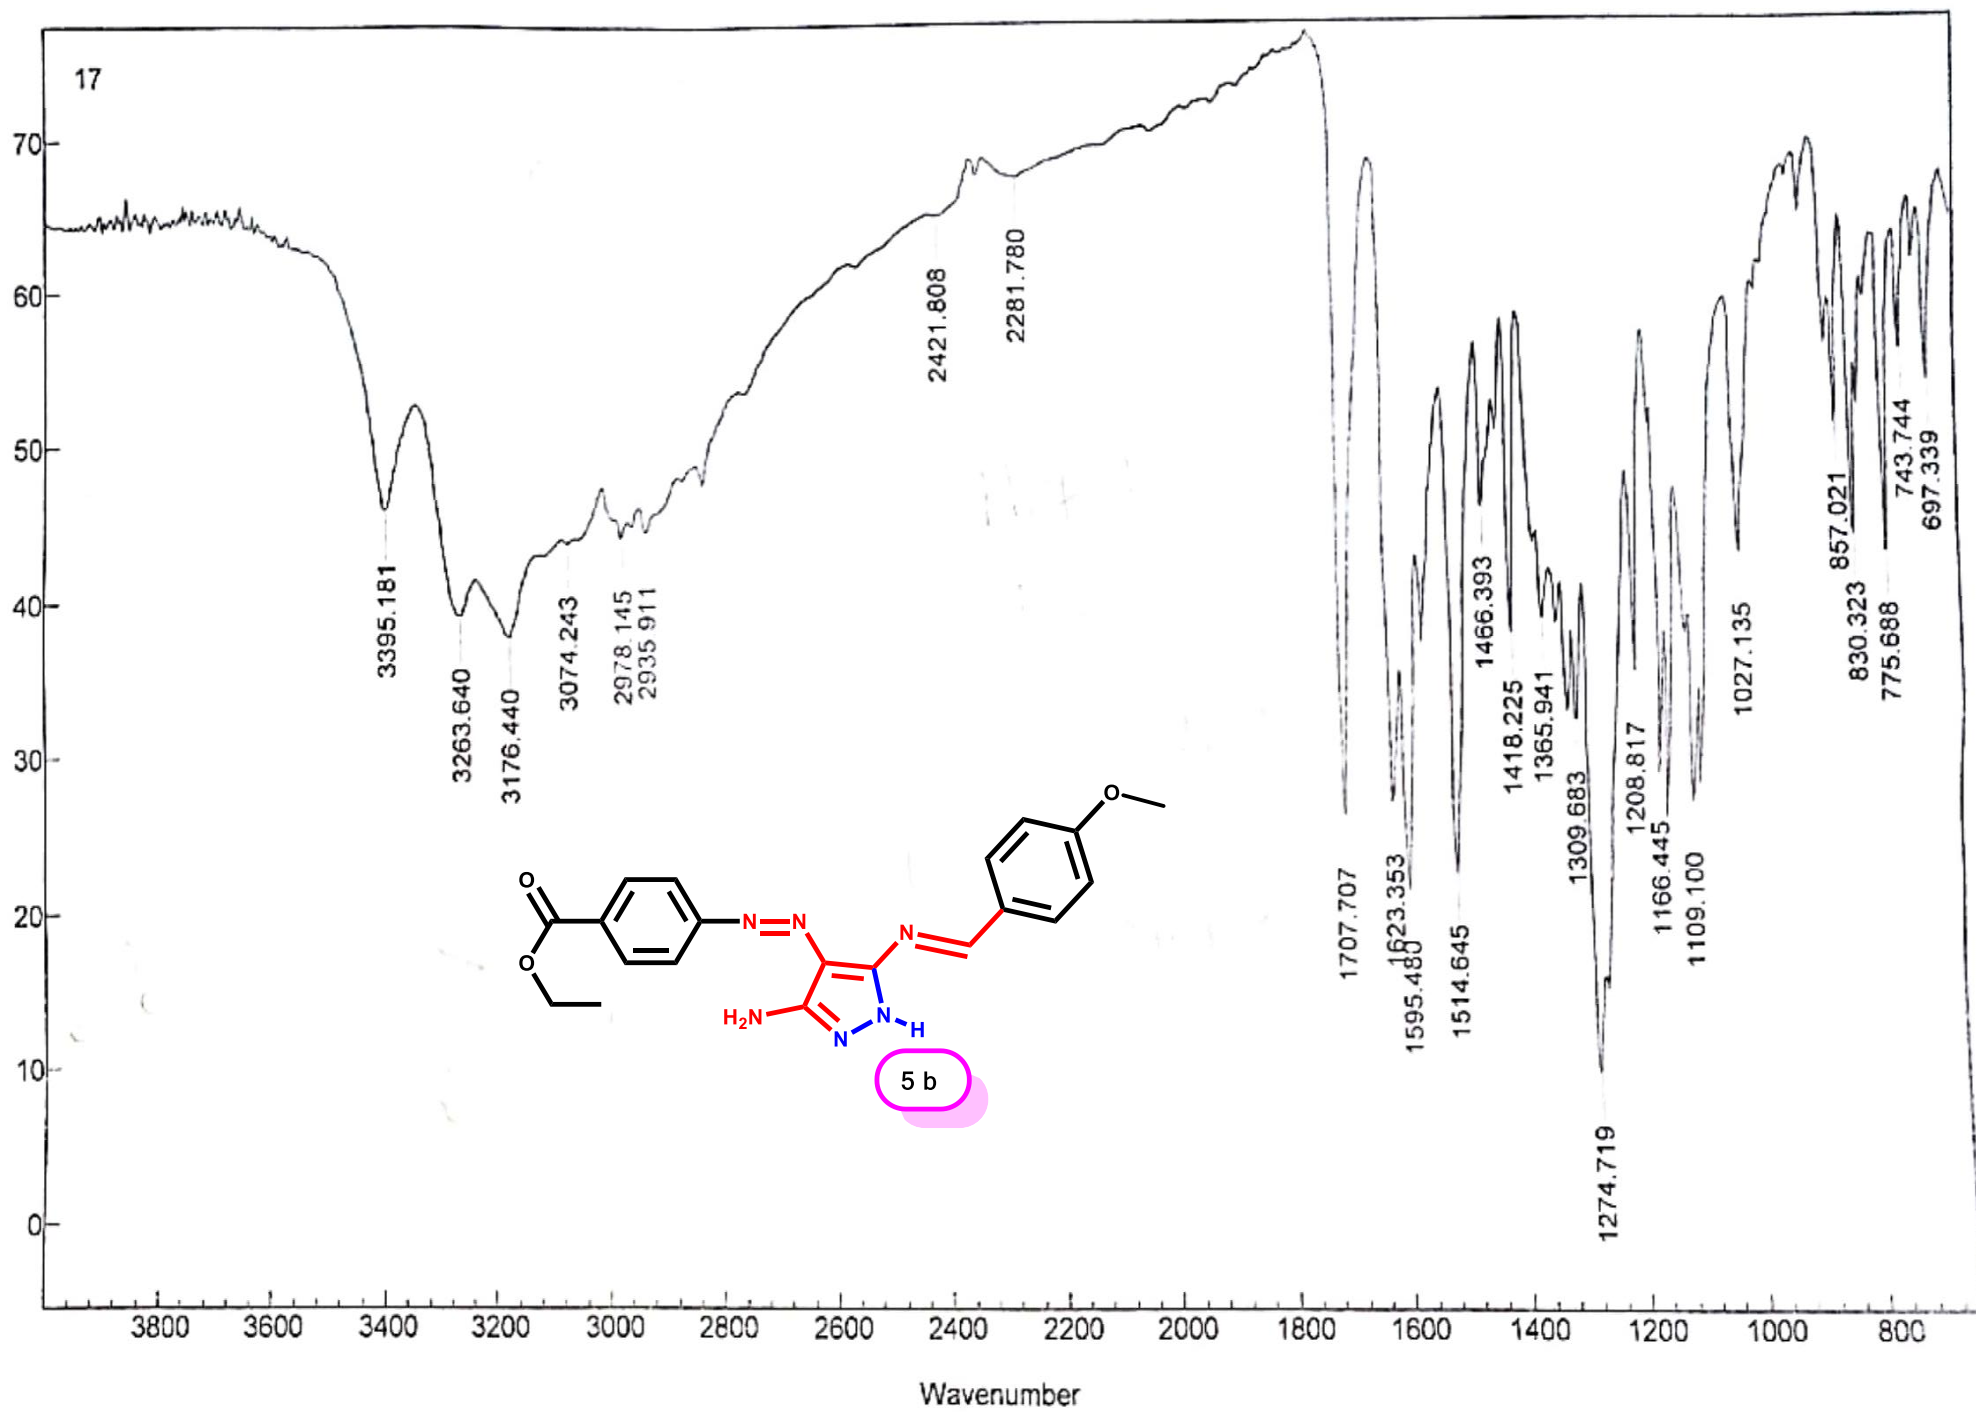

<sup>1</sup>H NMR (4b)

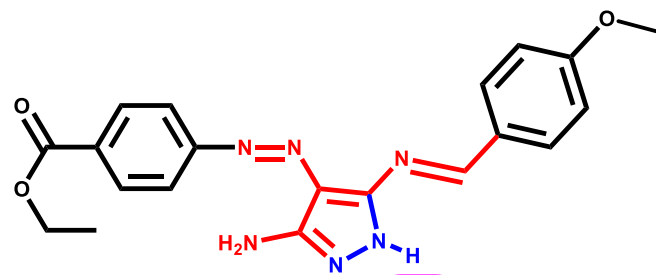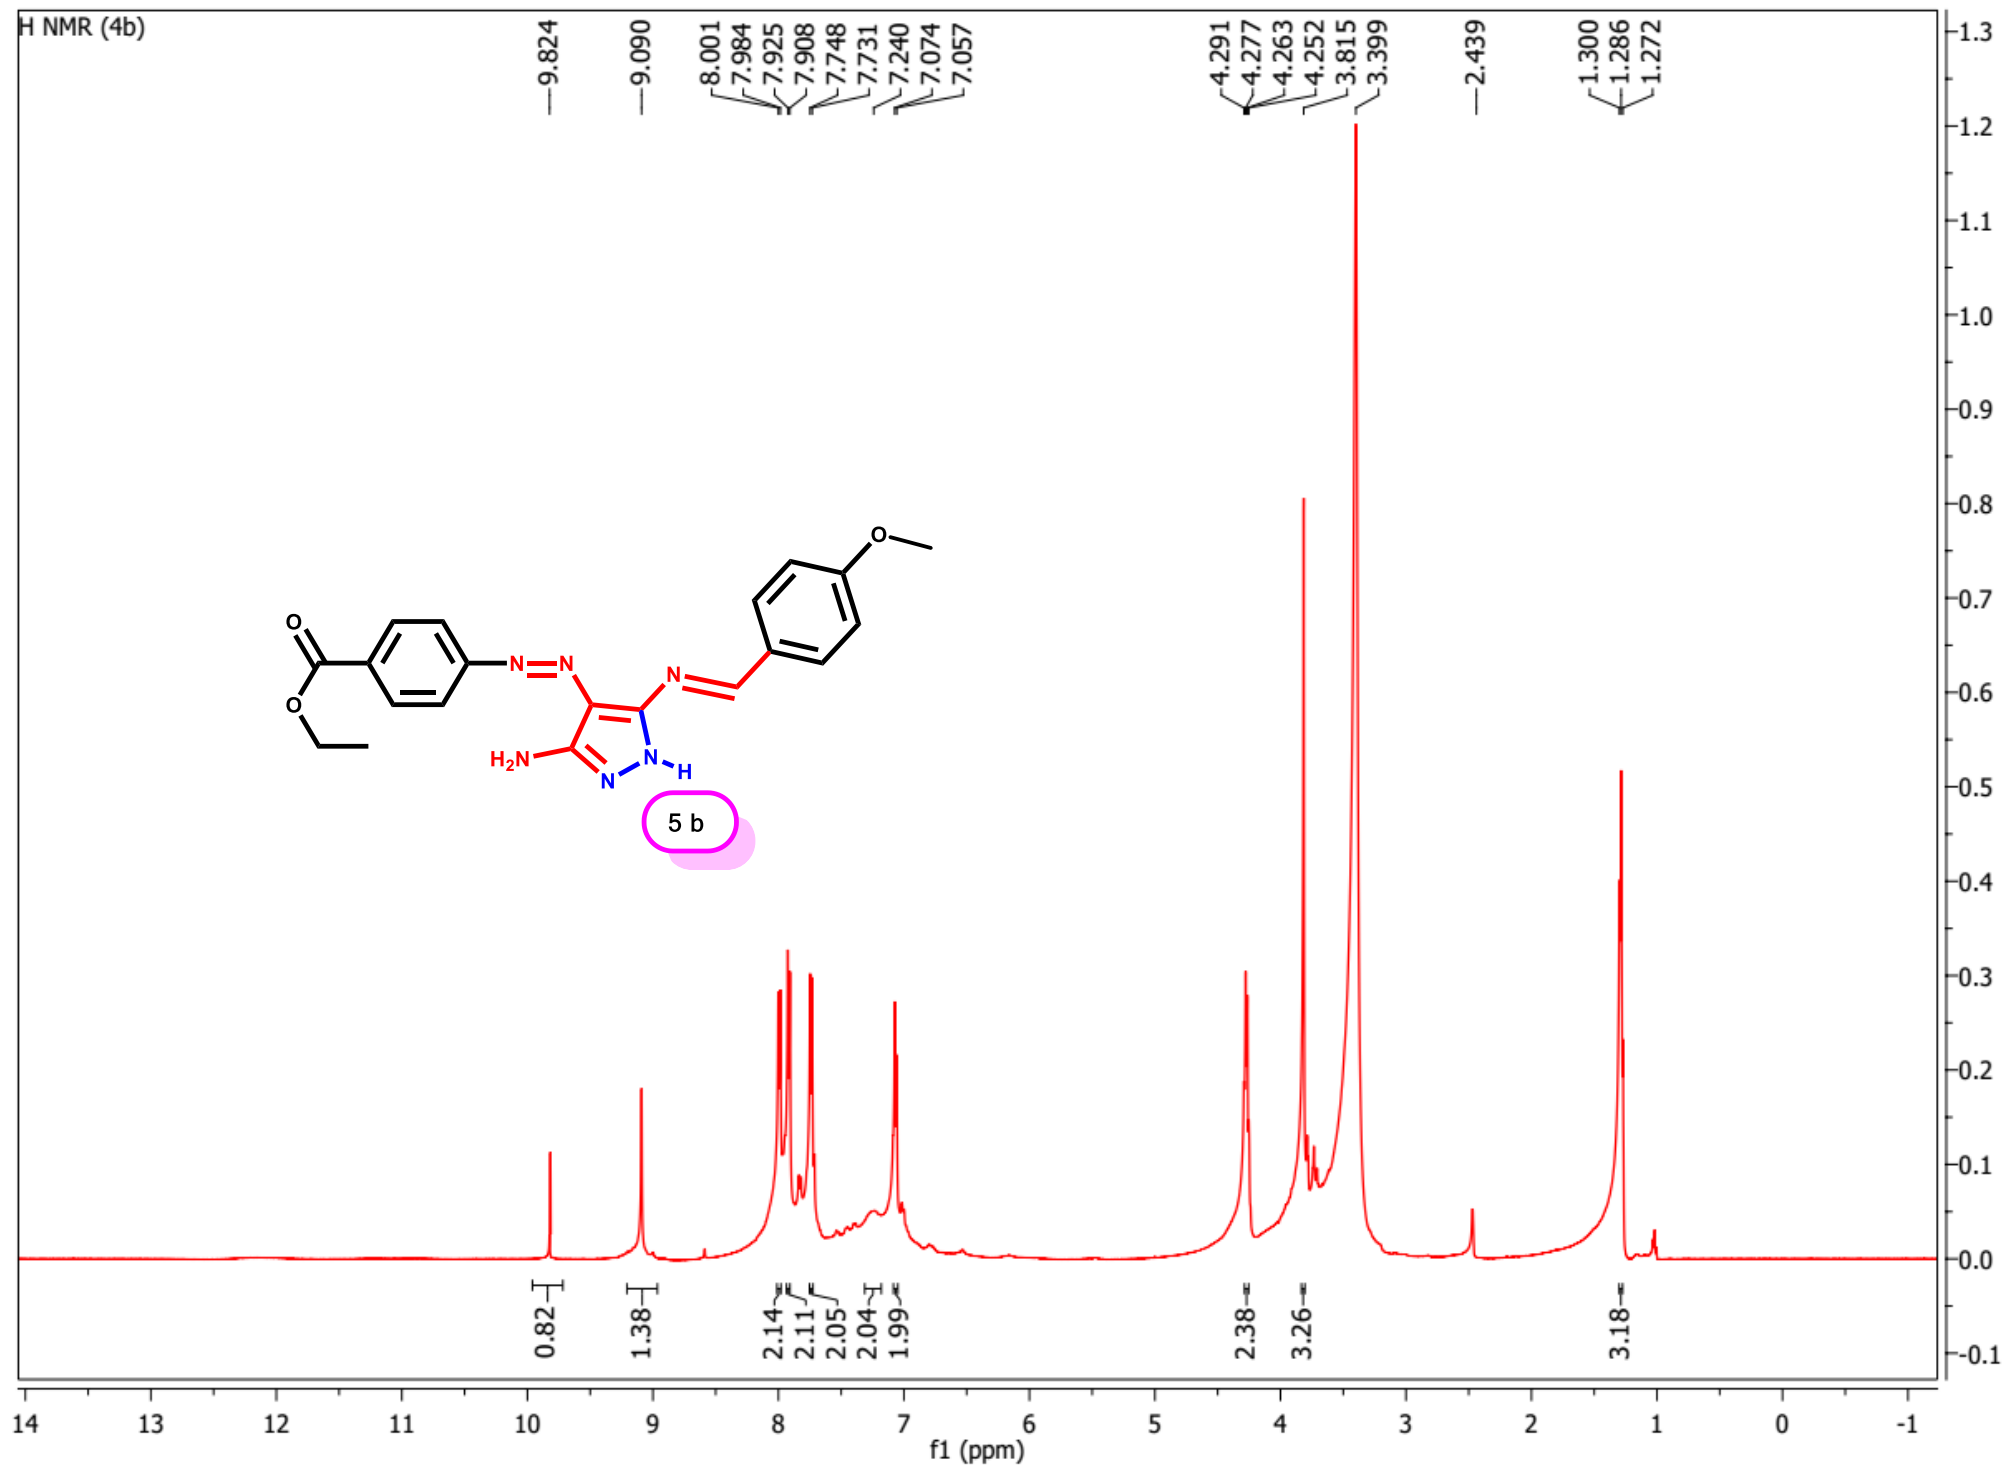

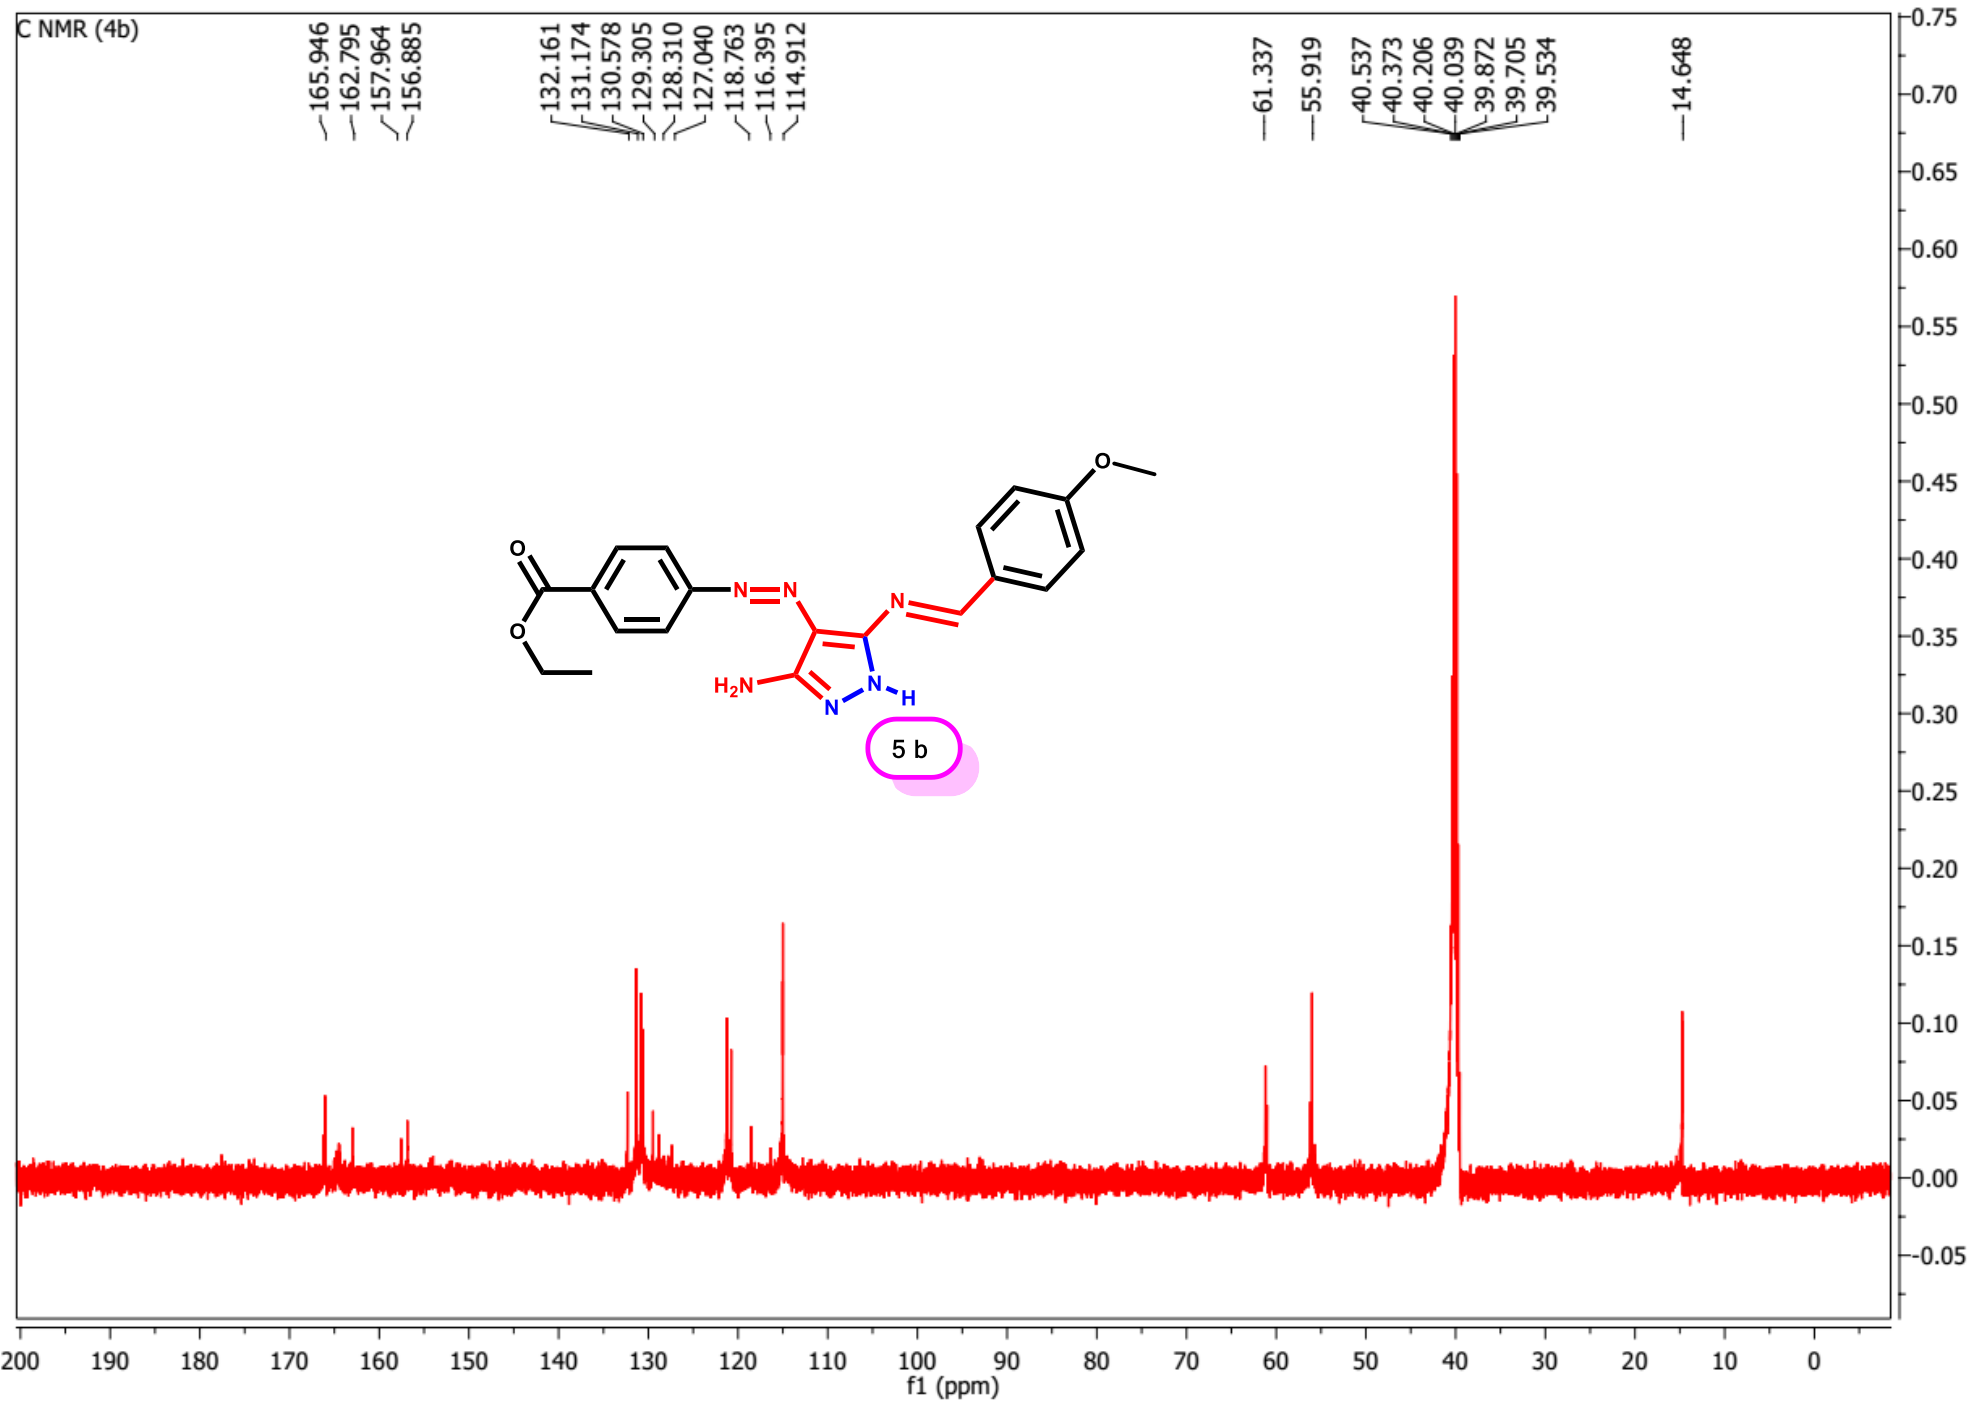

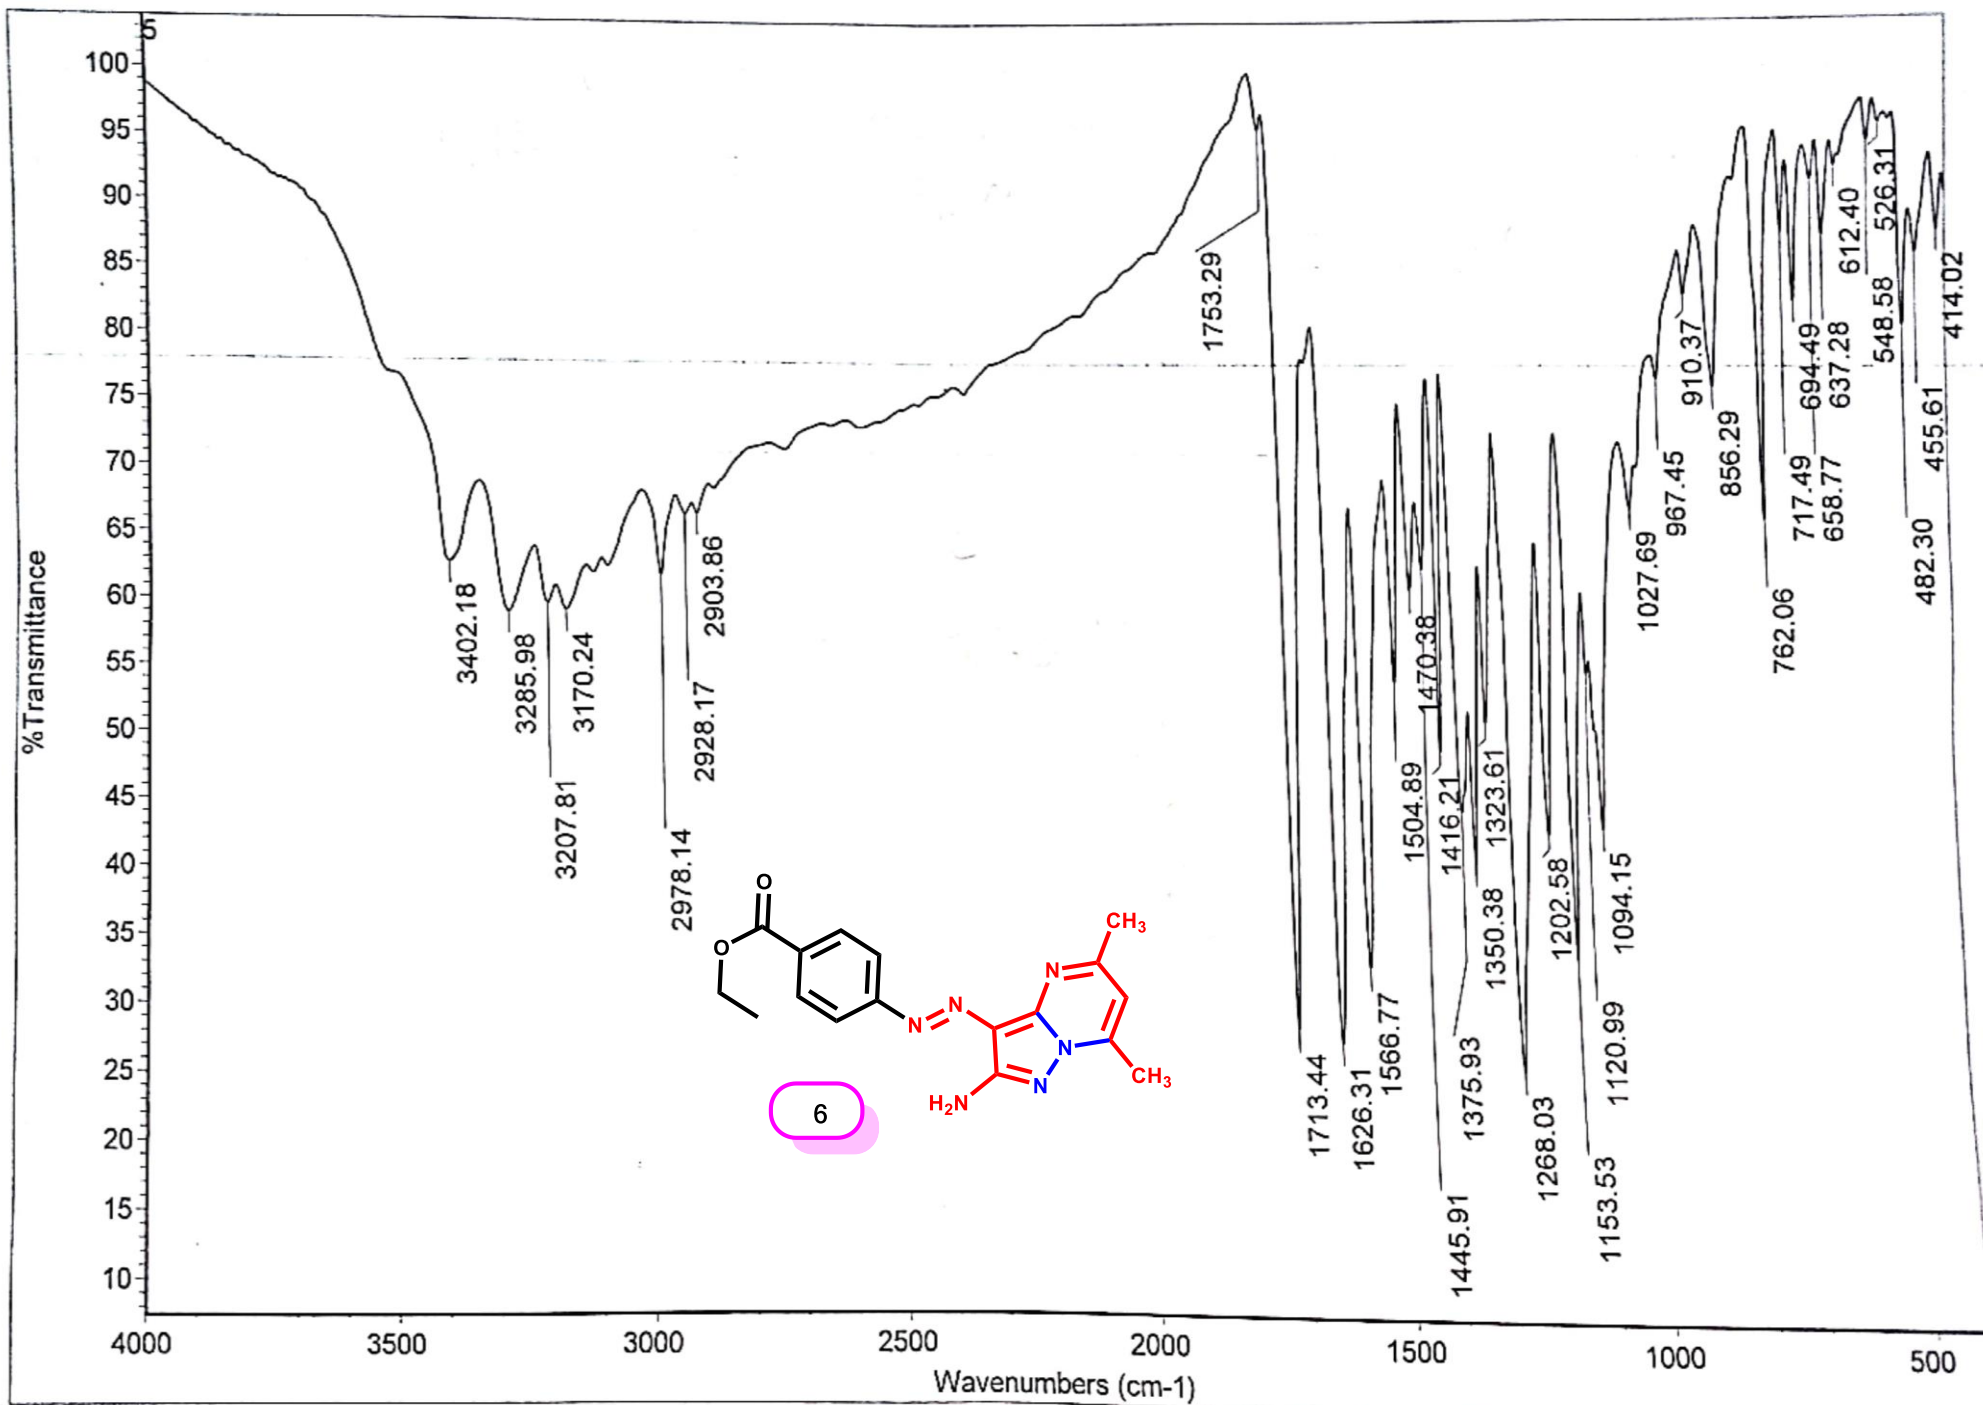

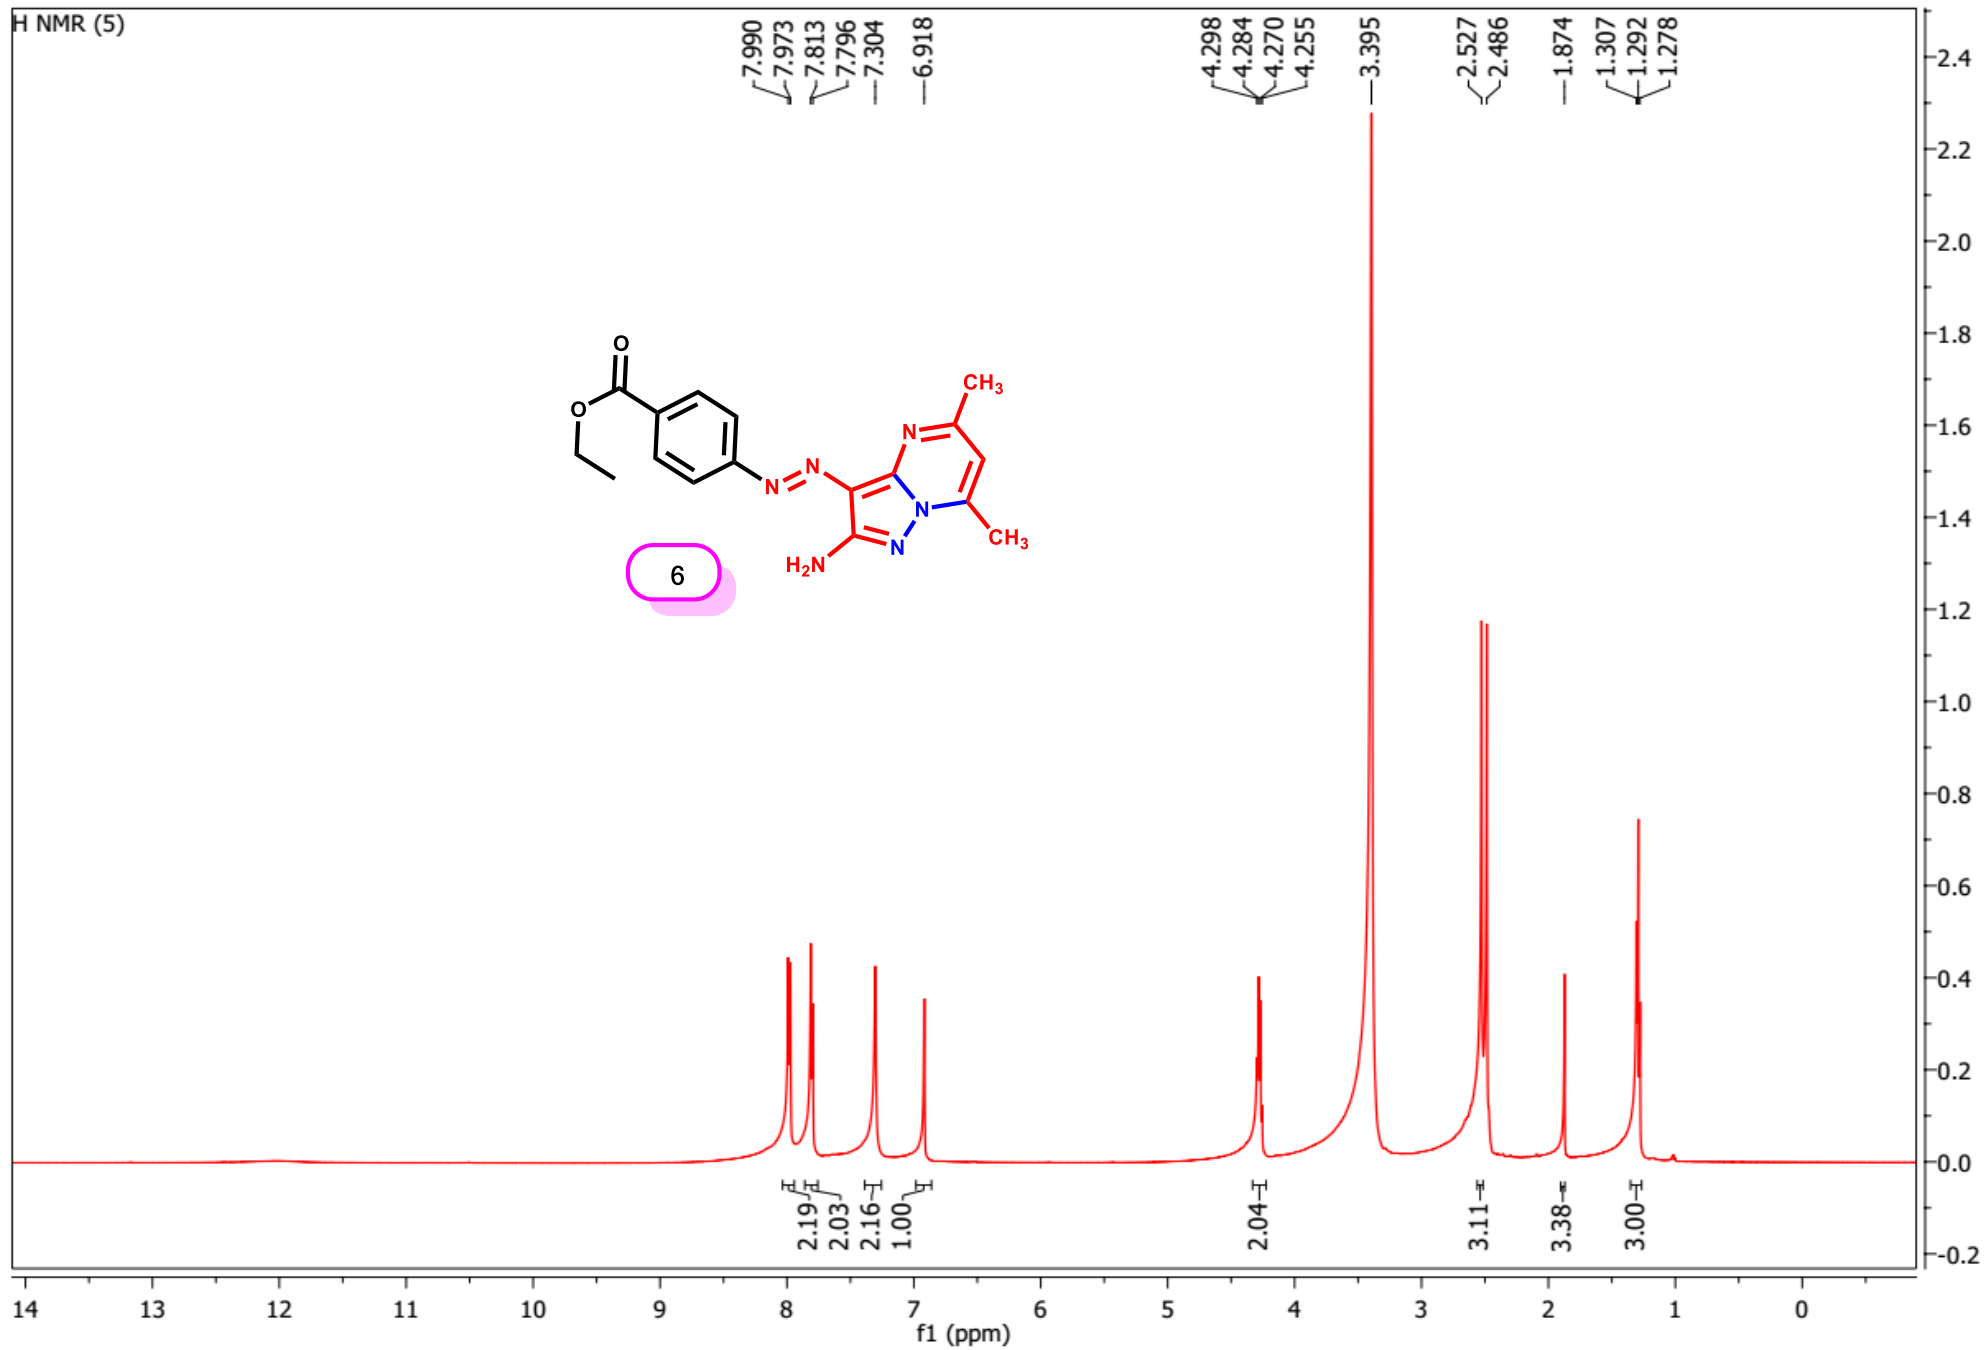

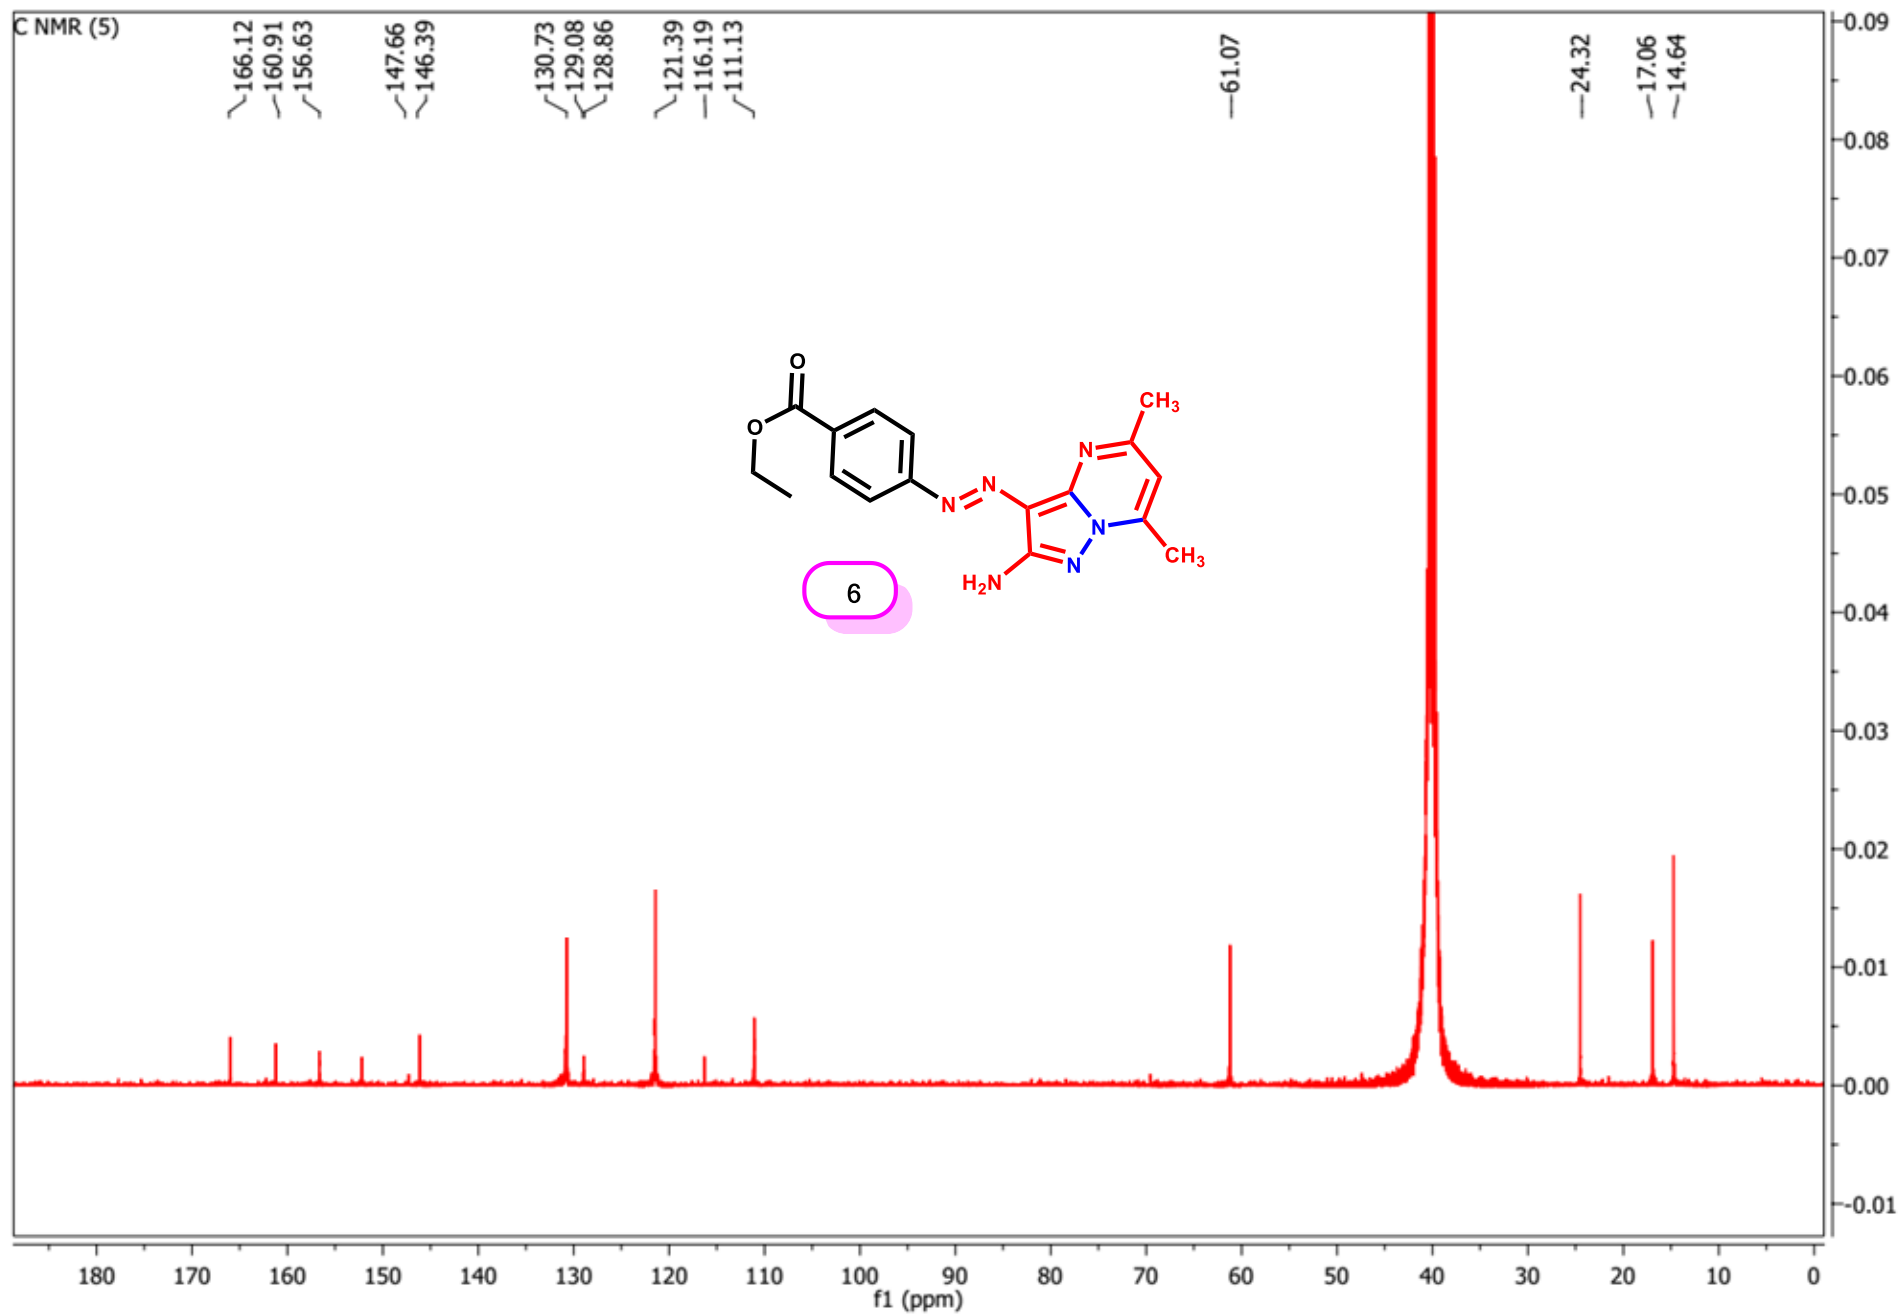

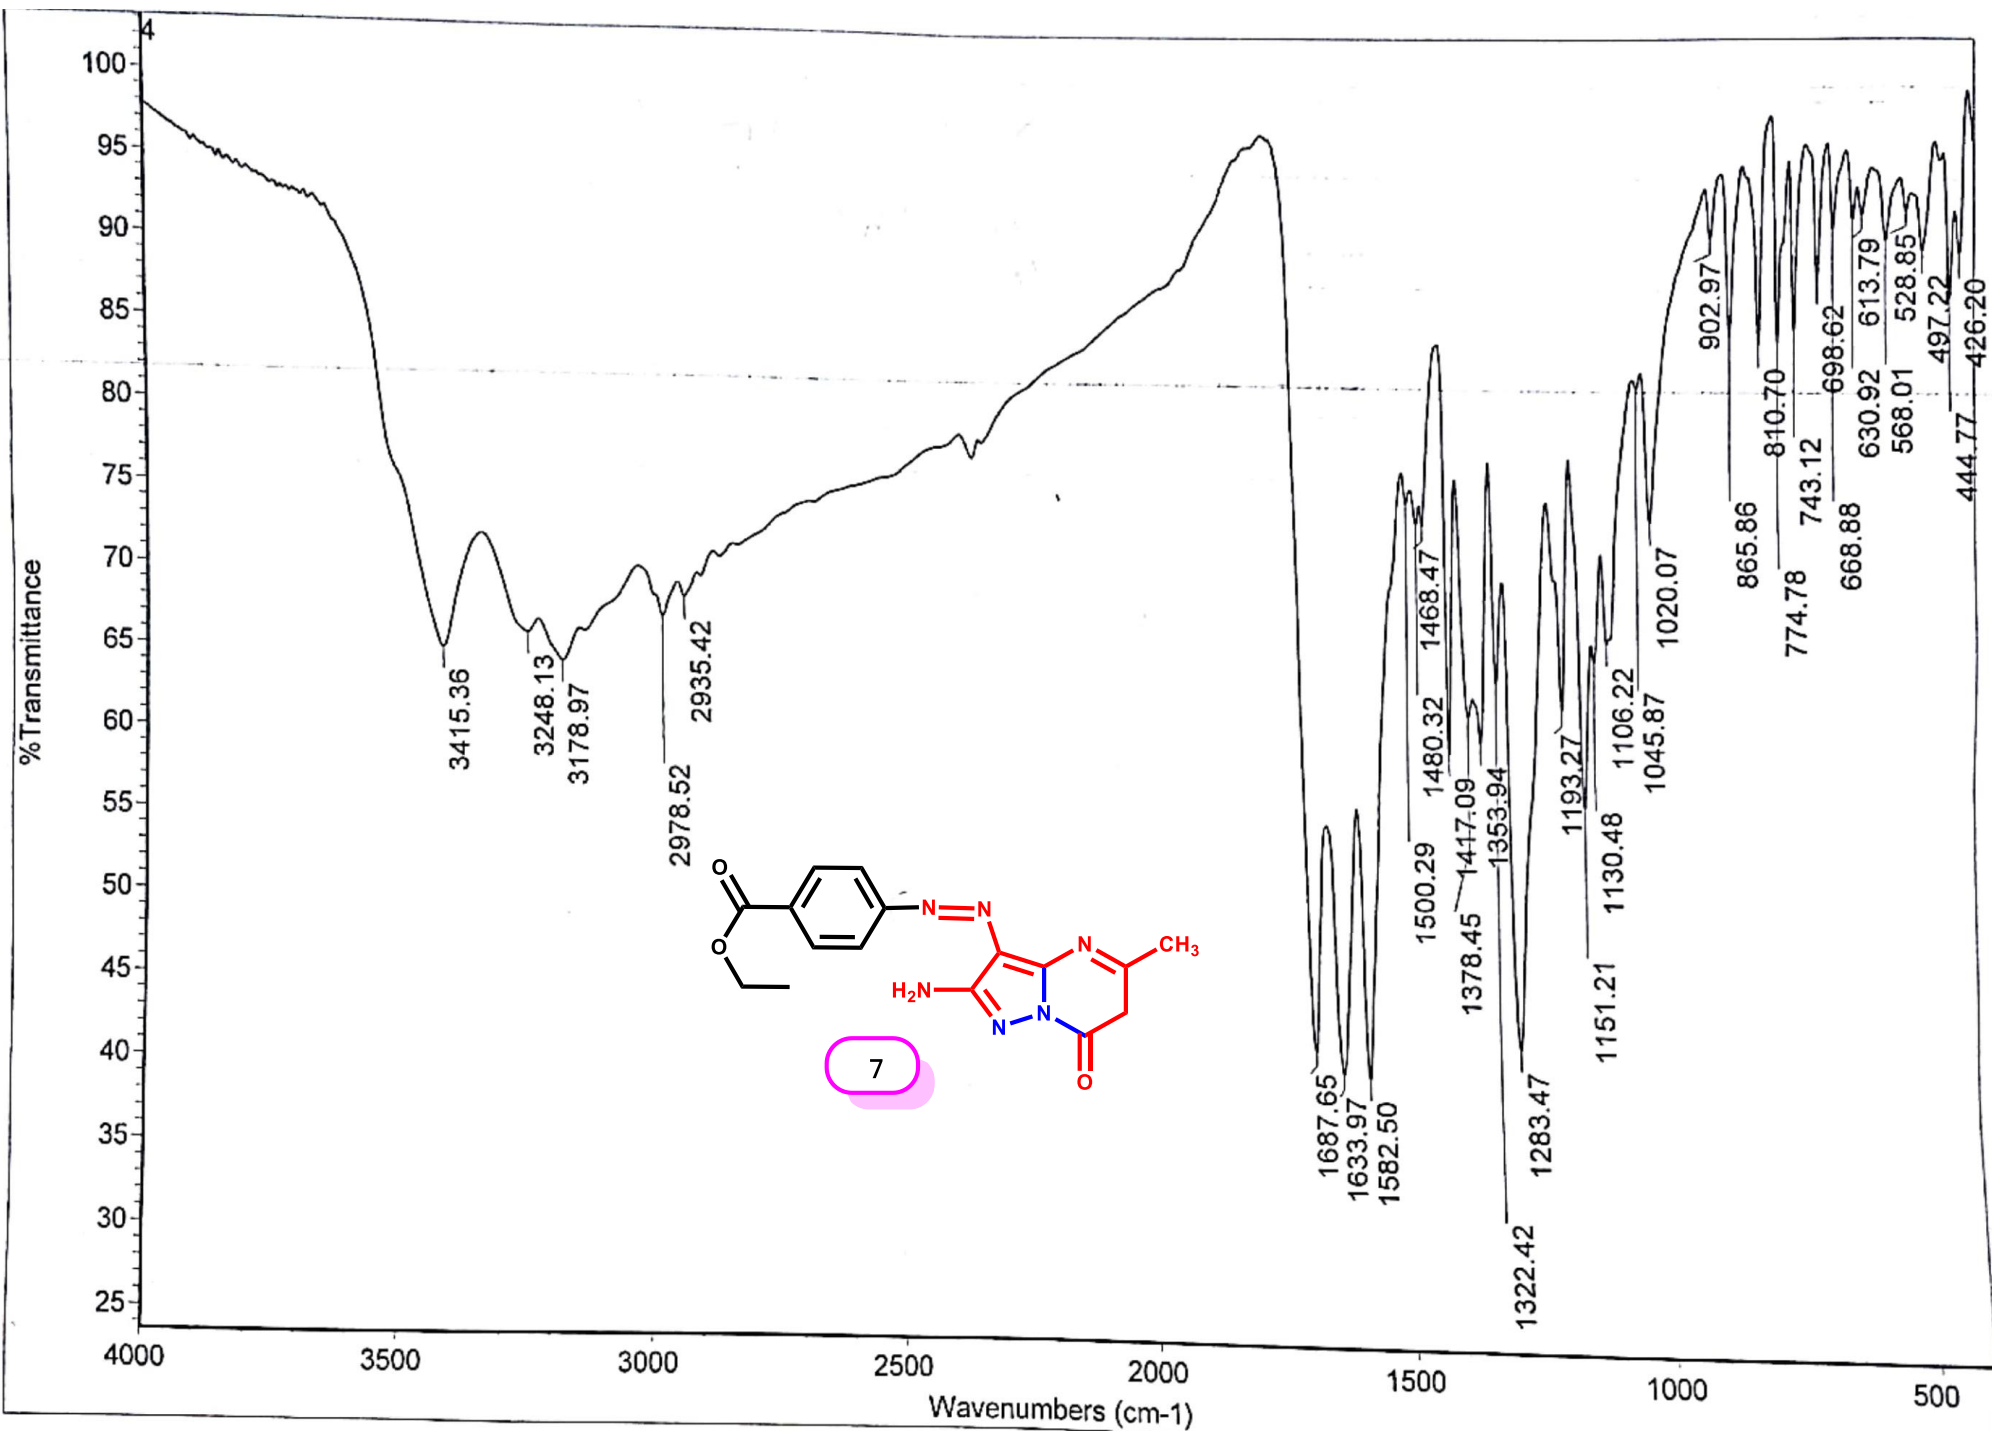

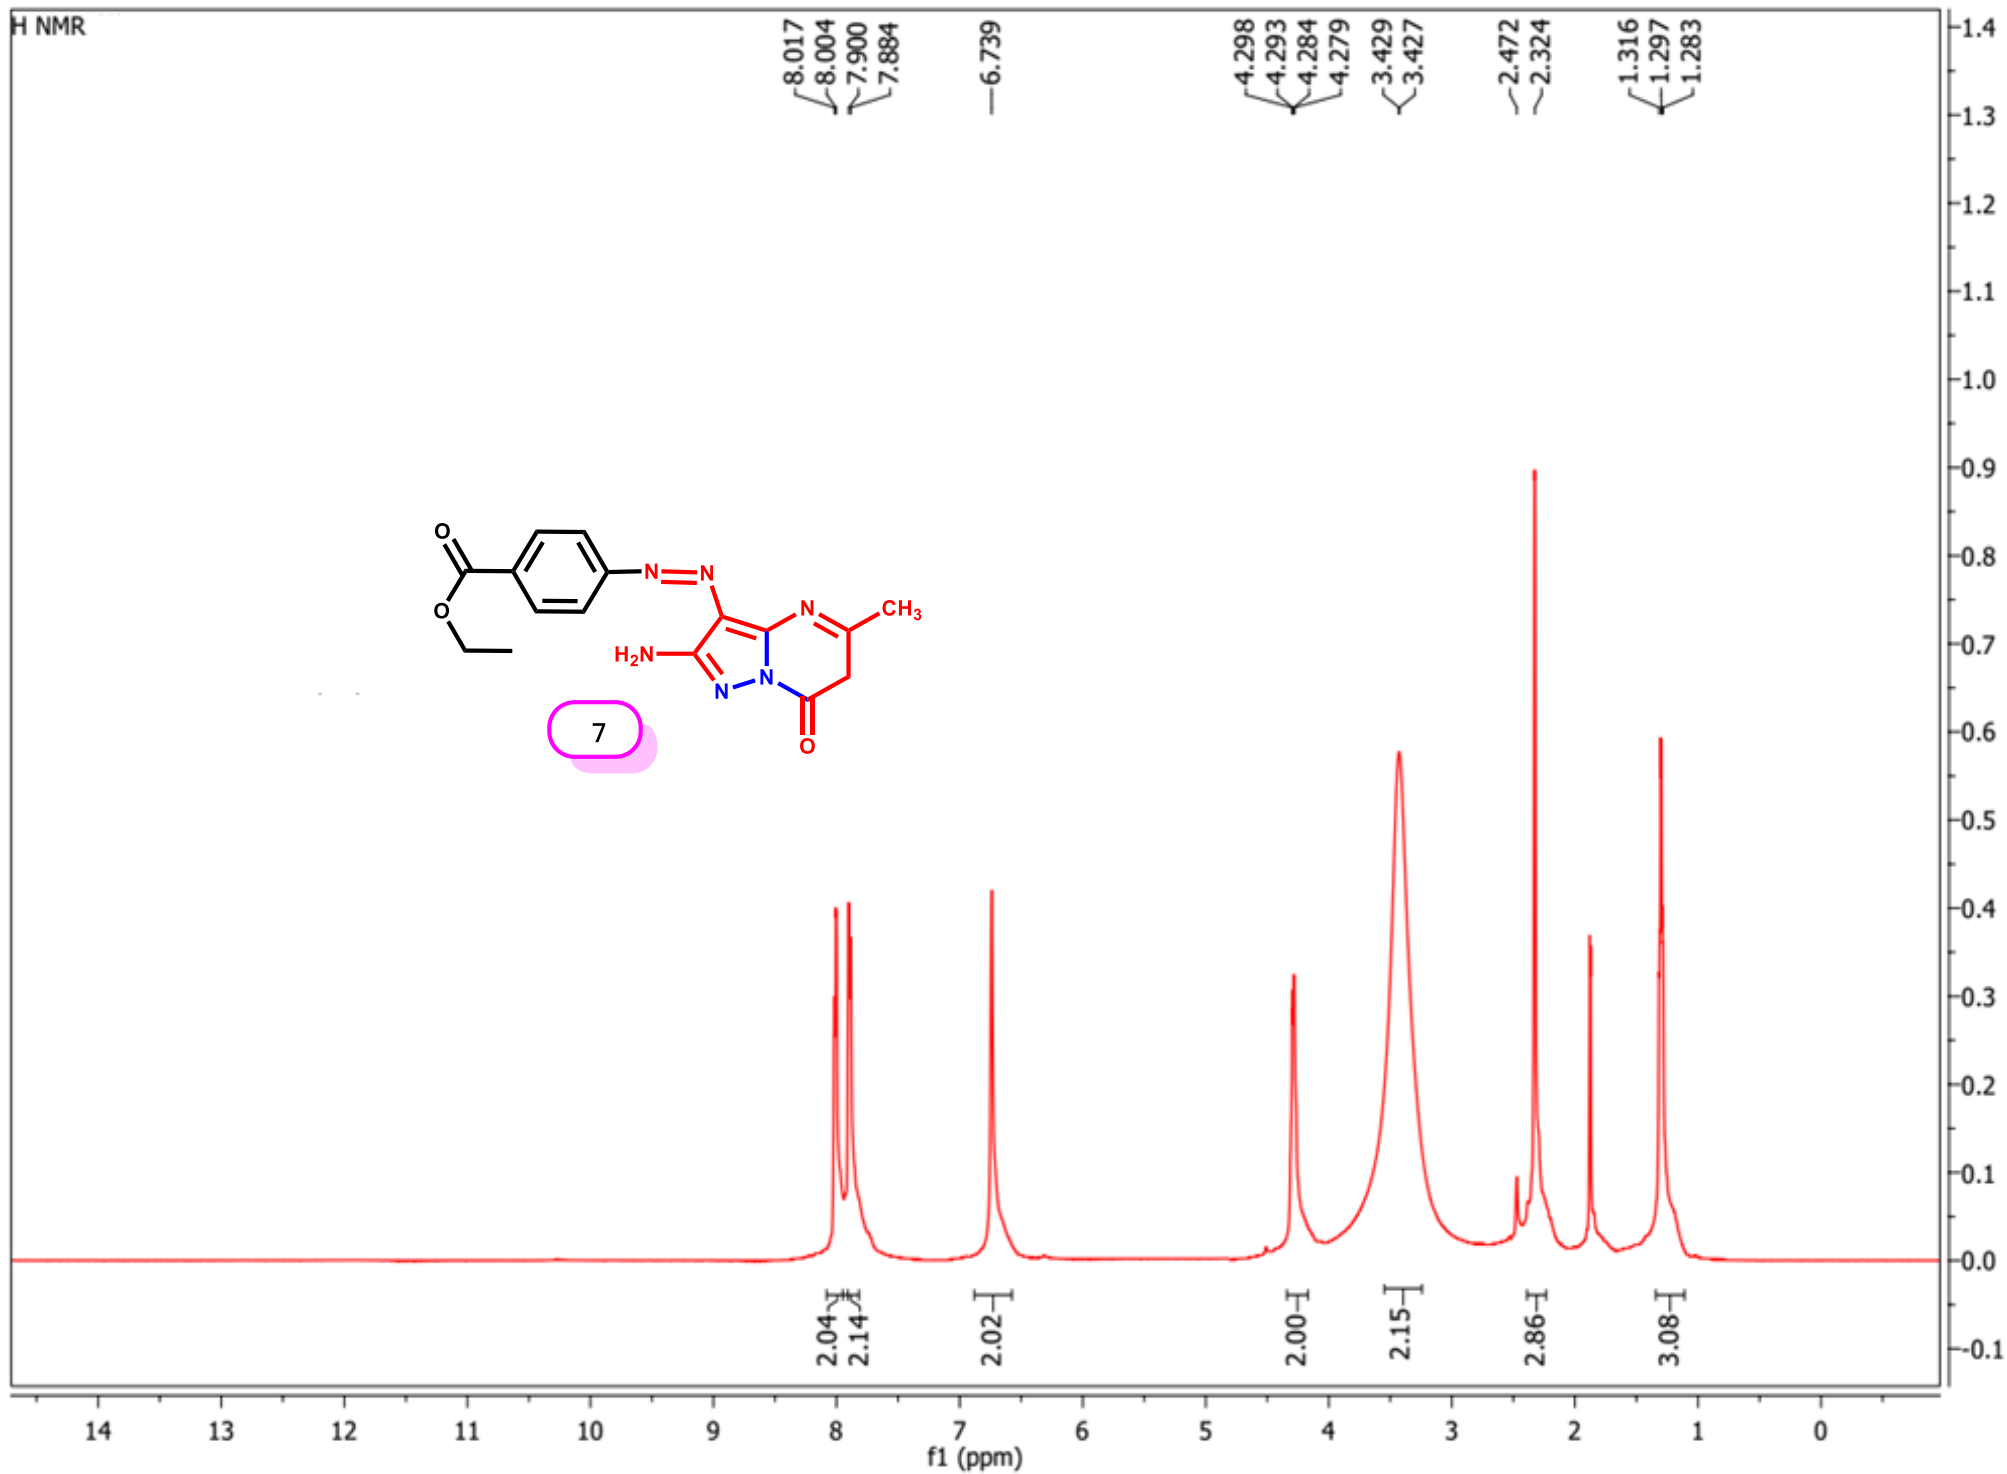

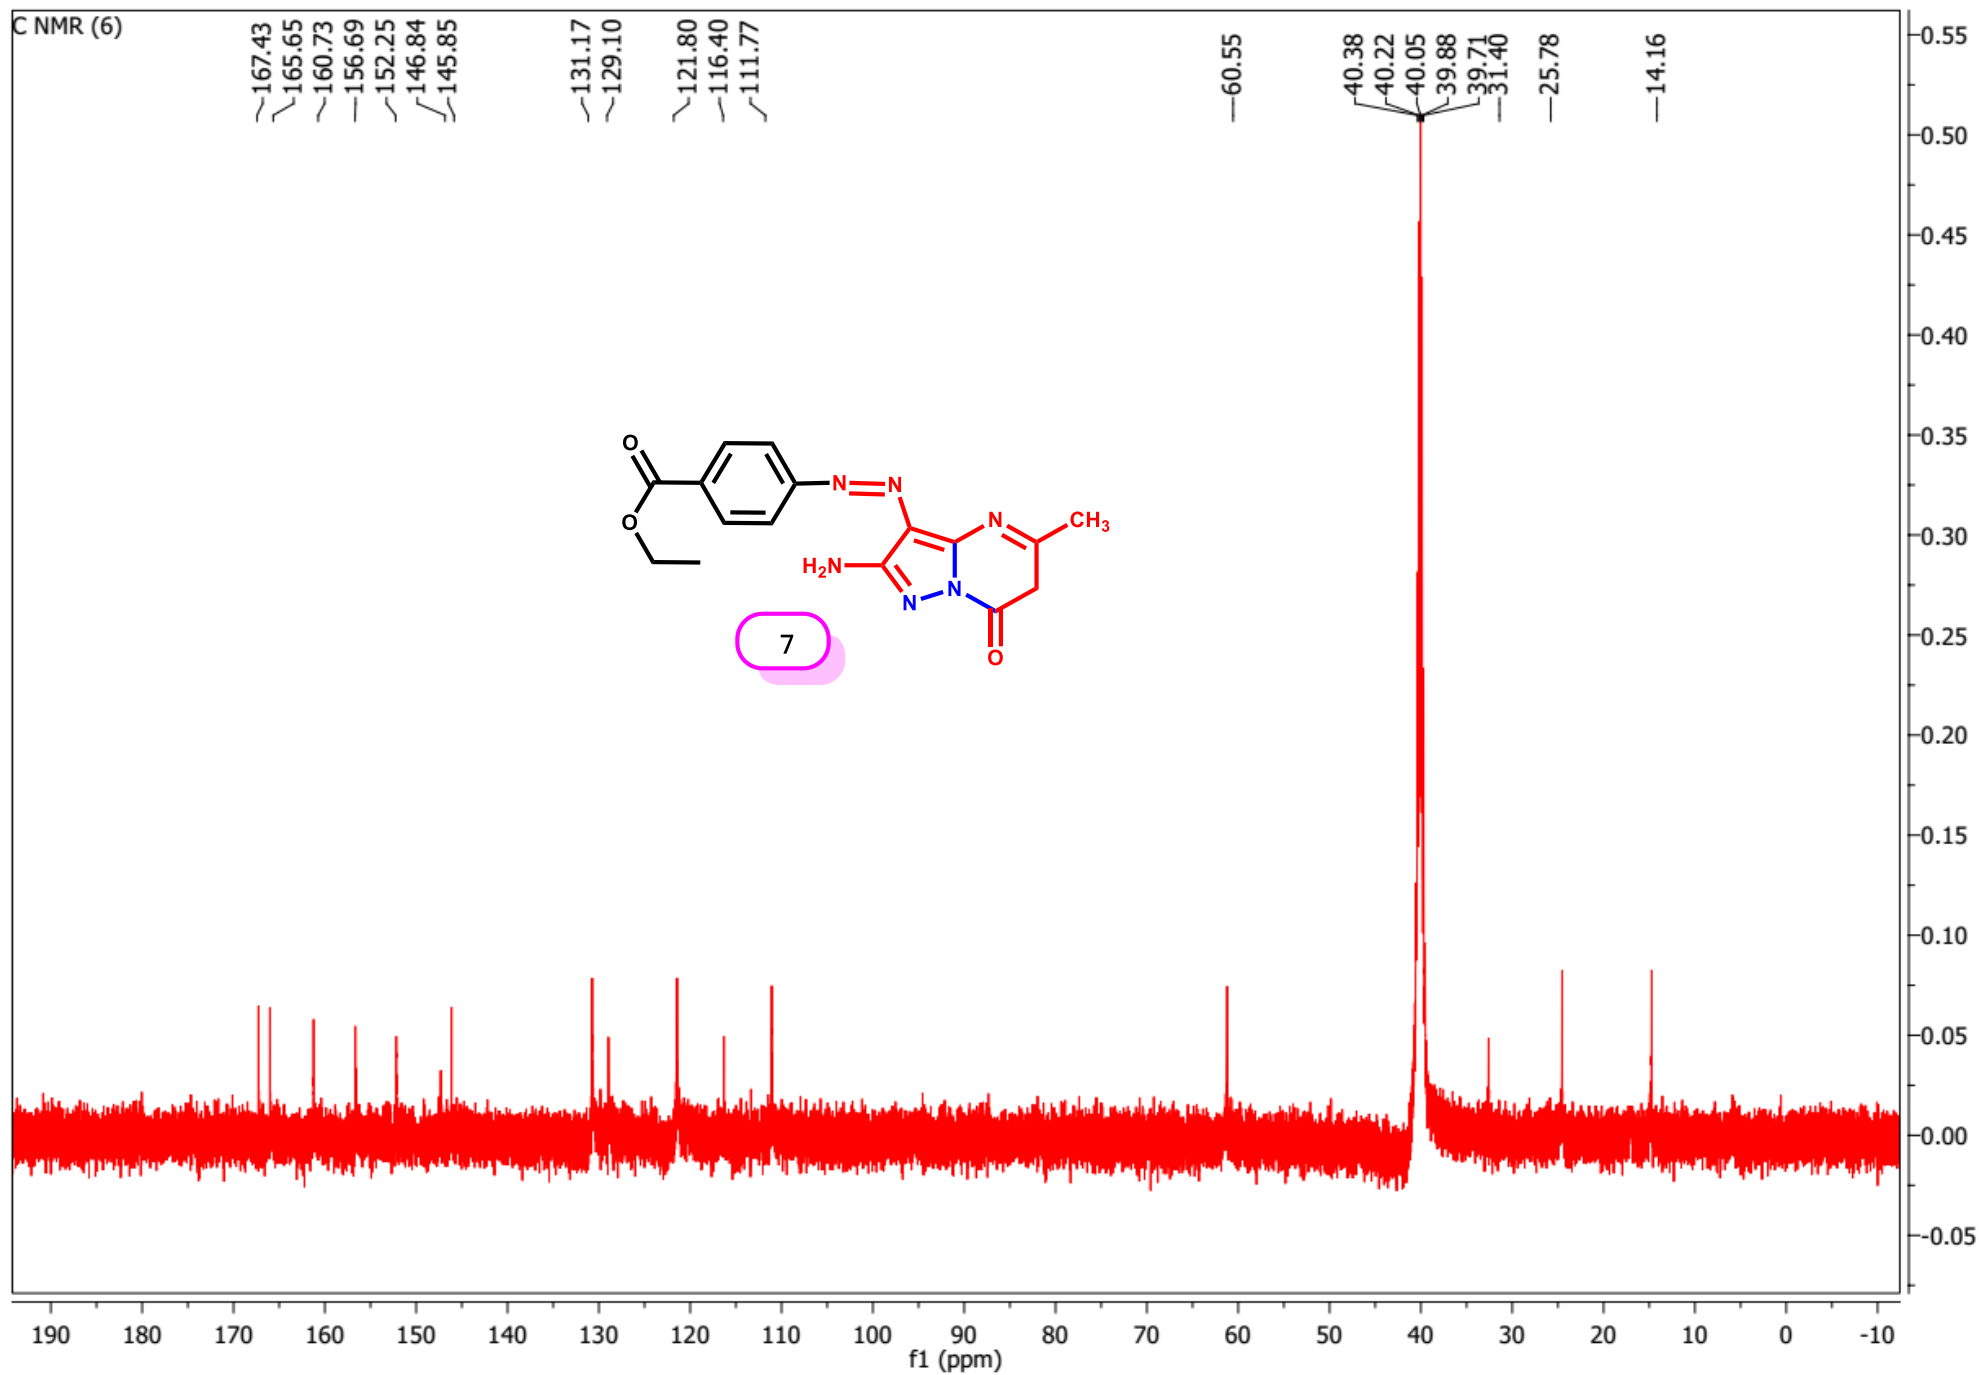

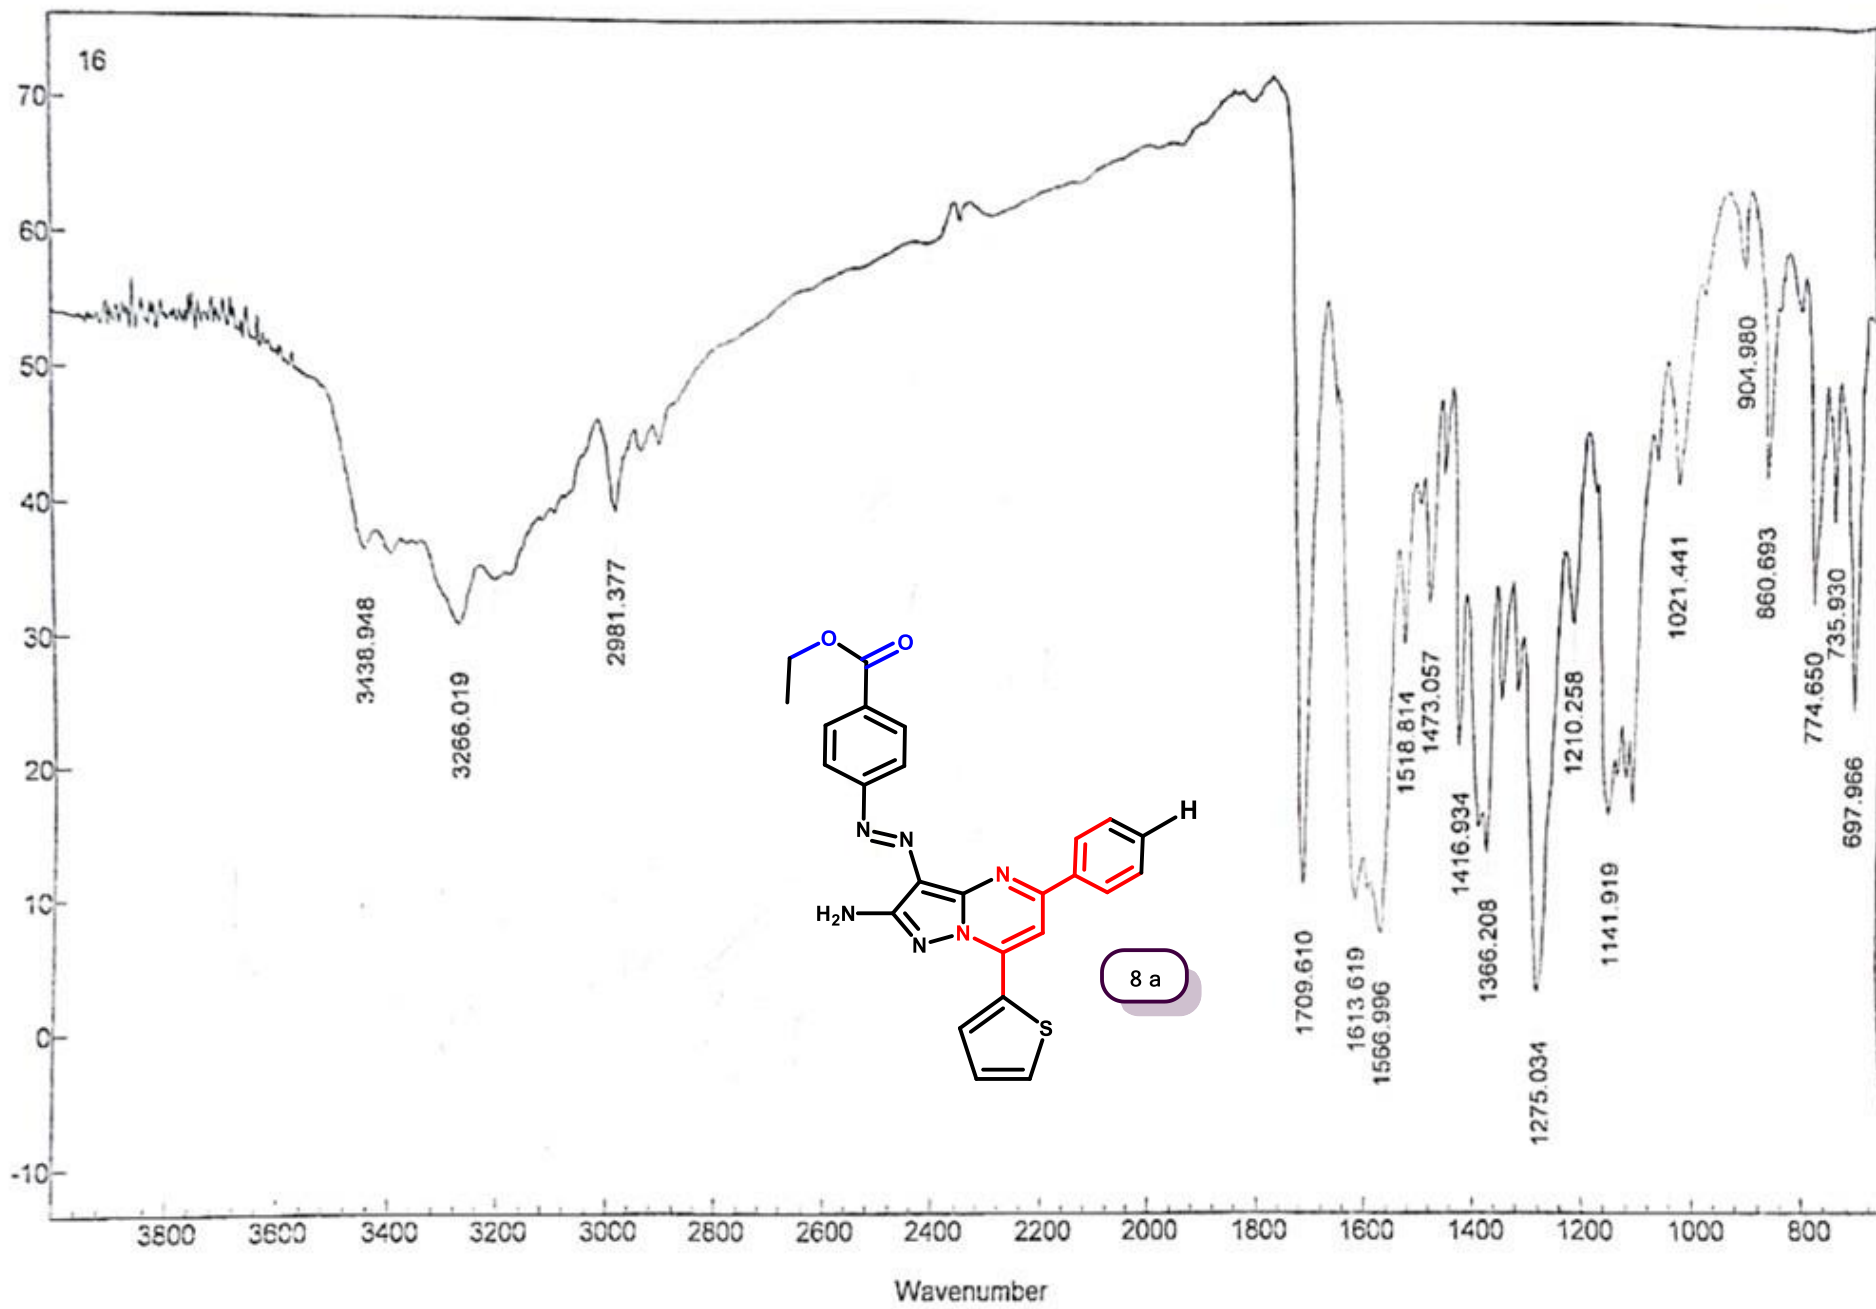

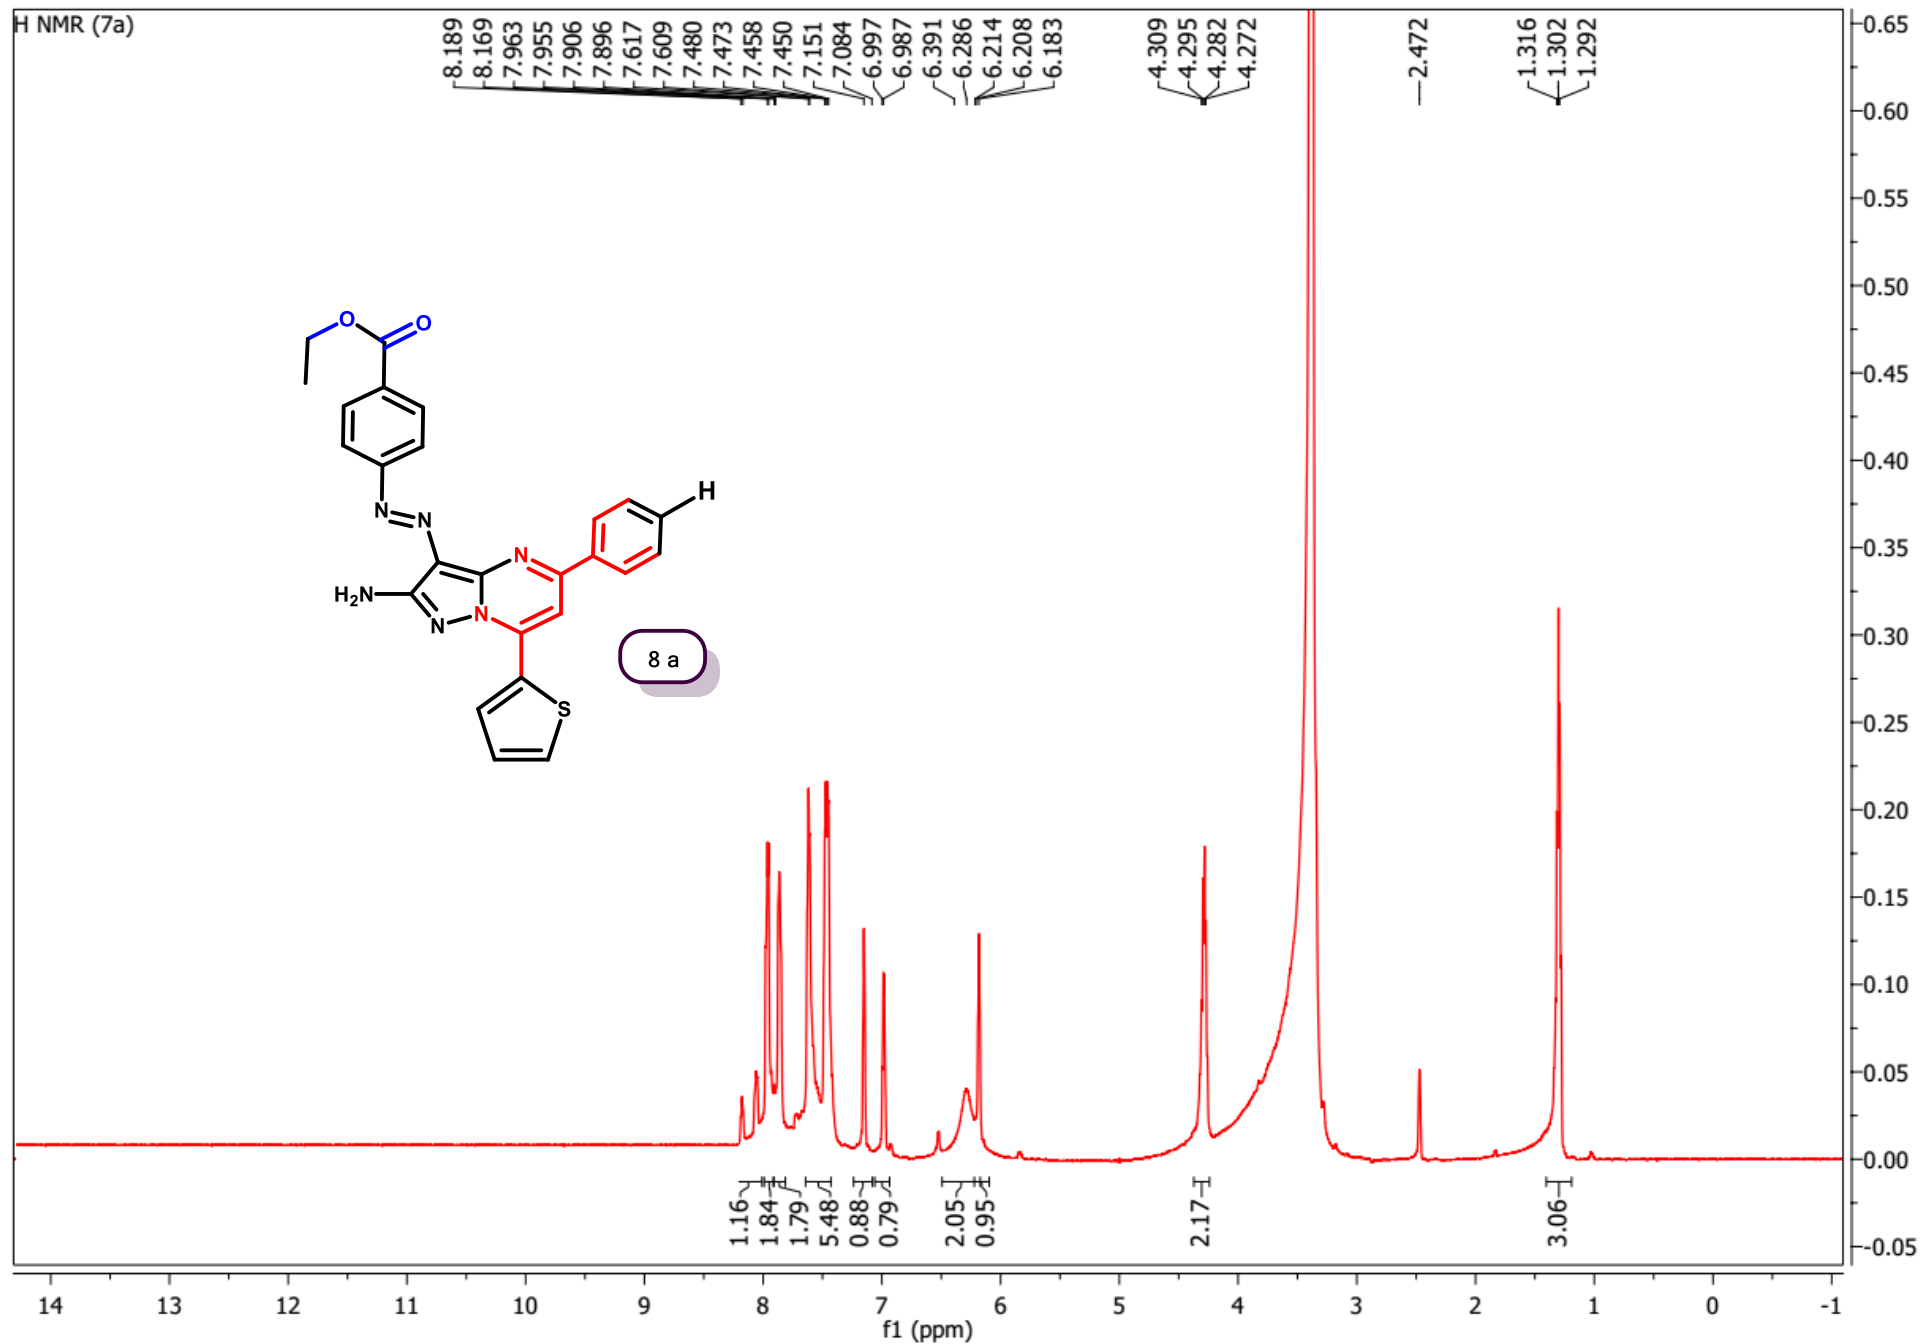

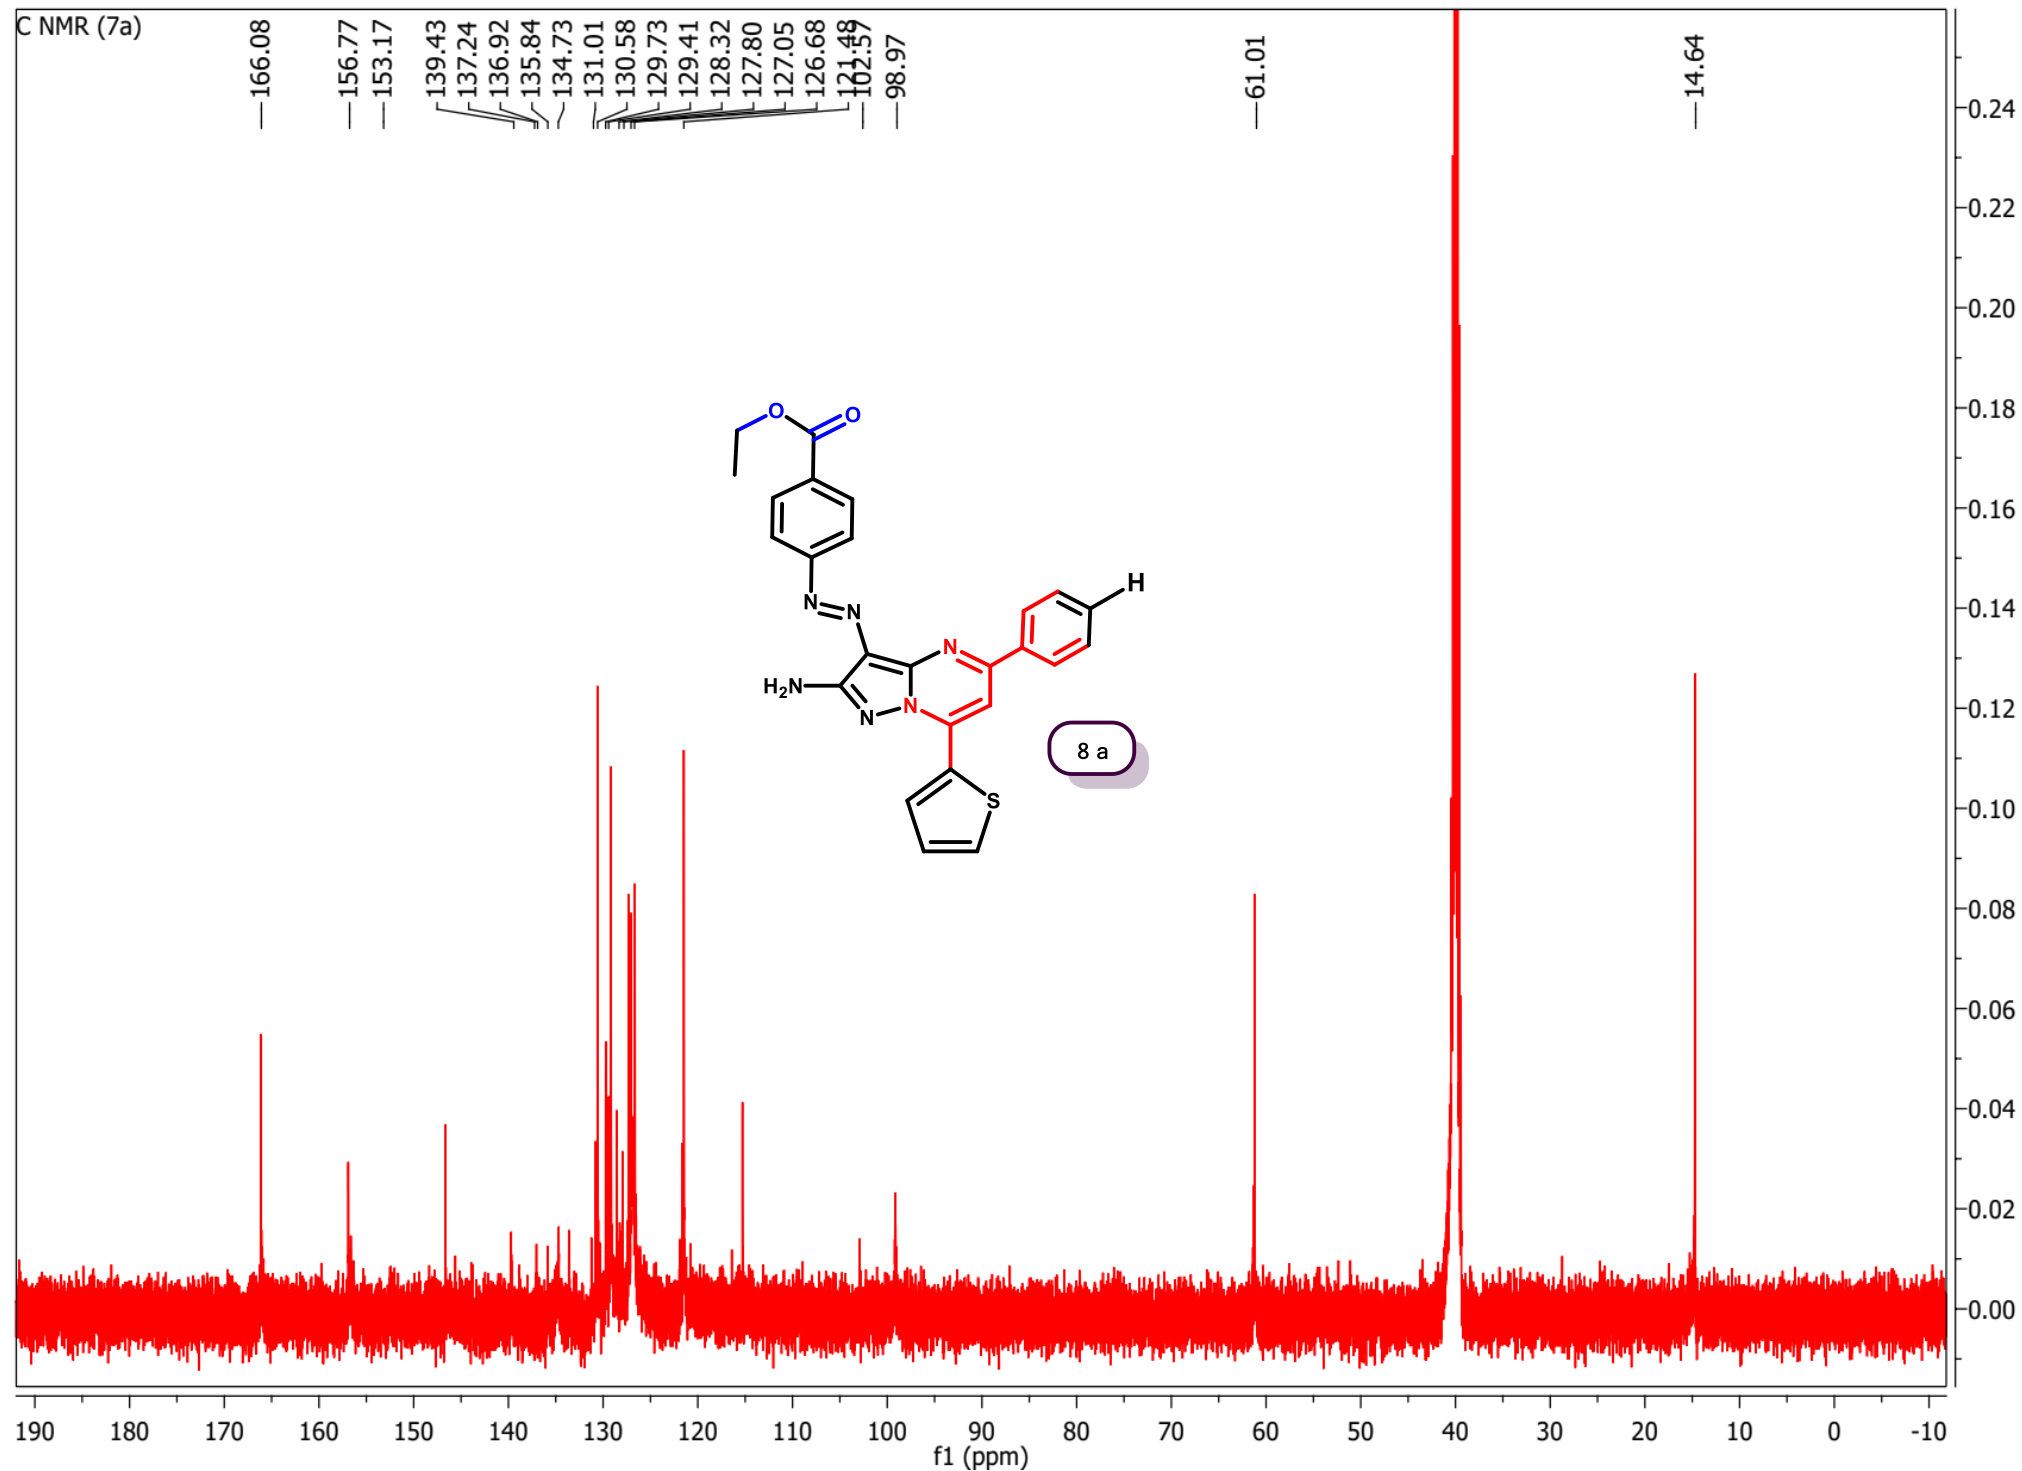

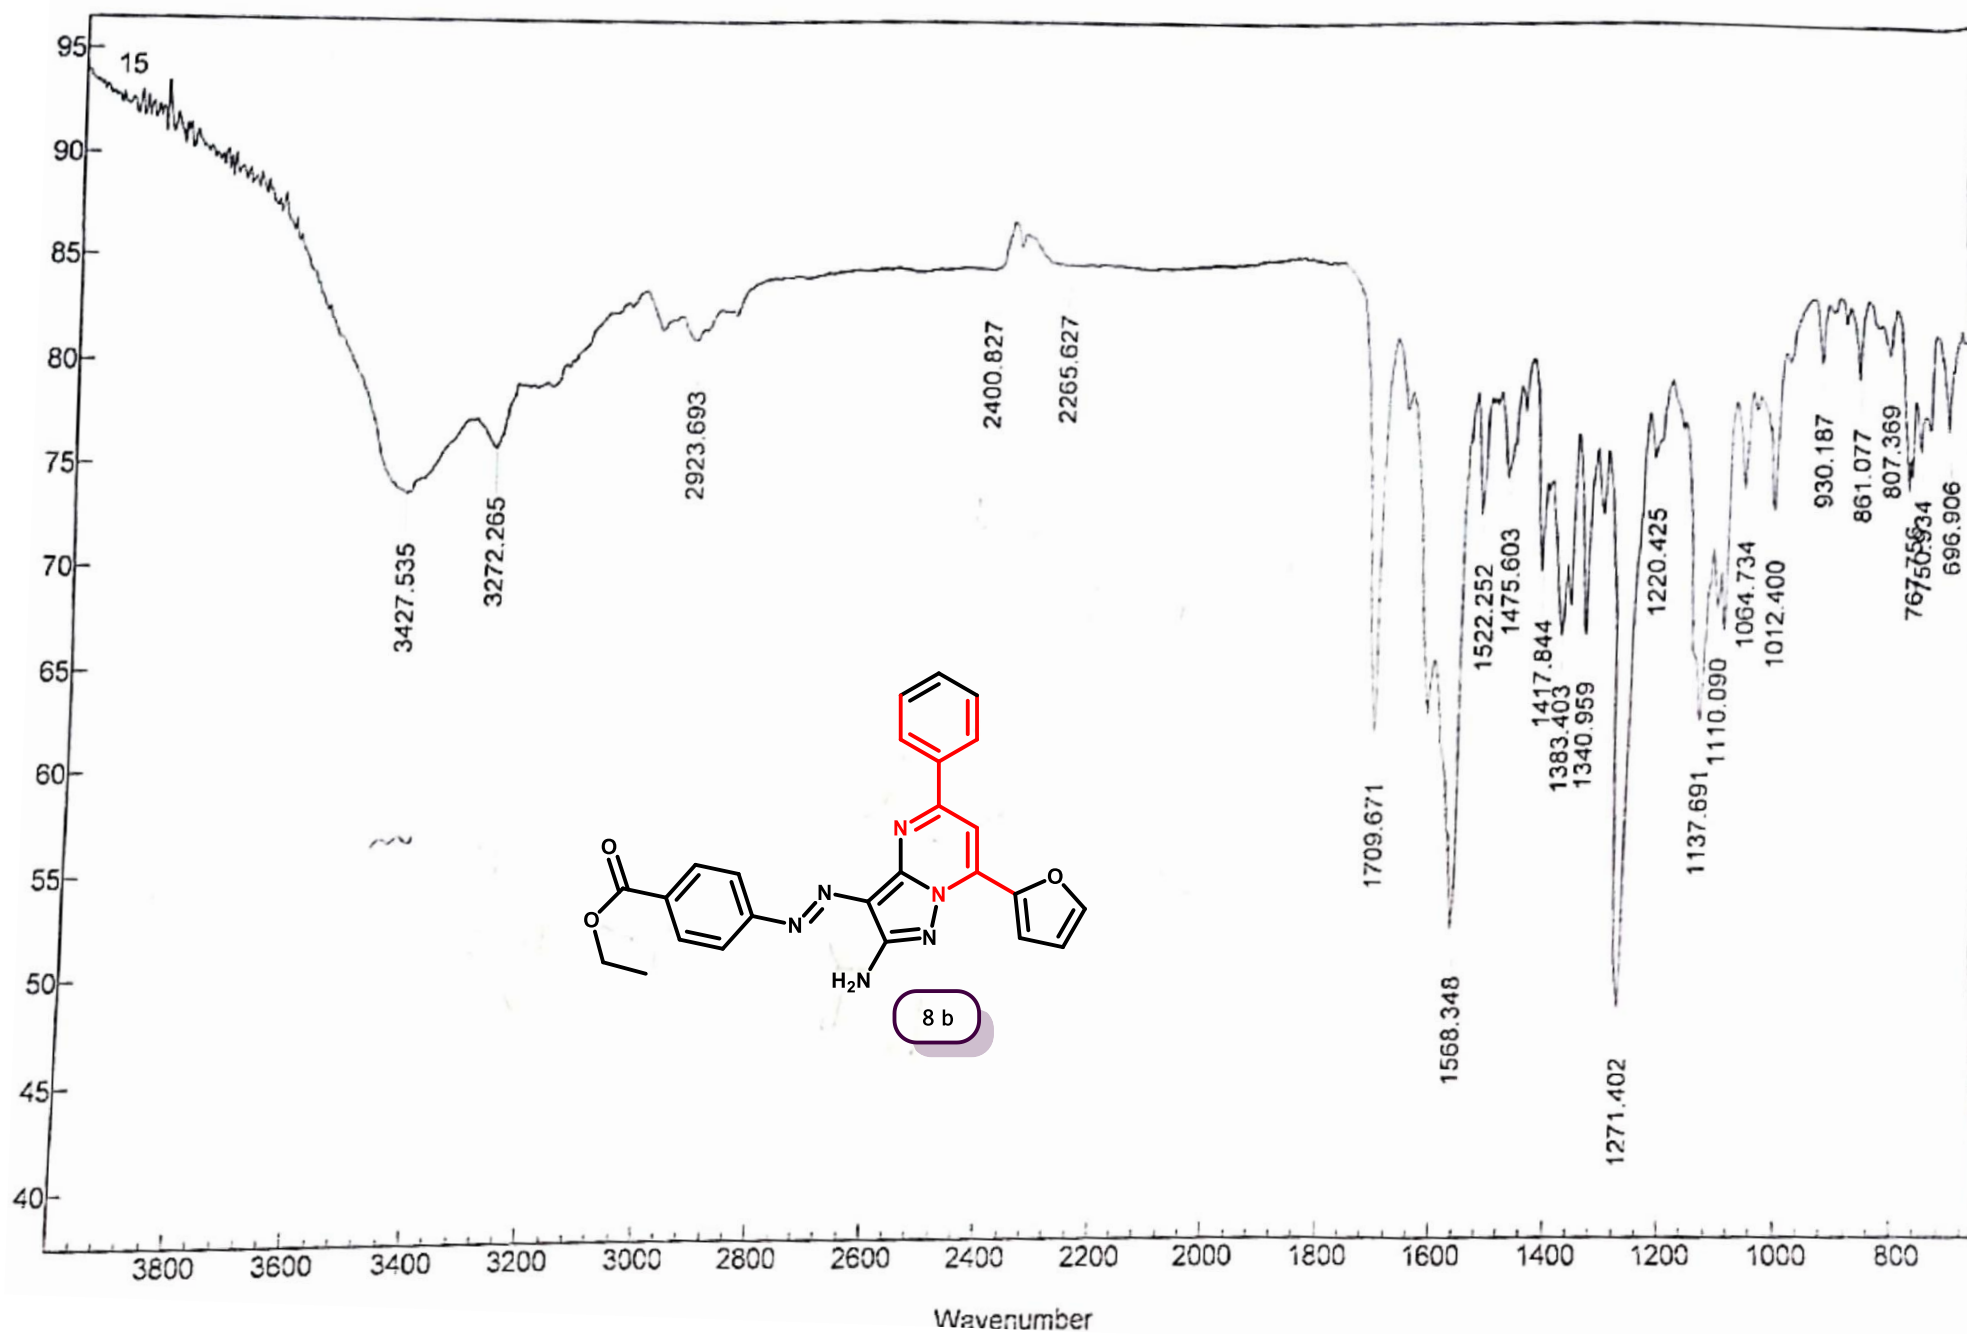

<sup>1</sup>H NMR (7b)

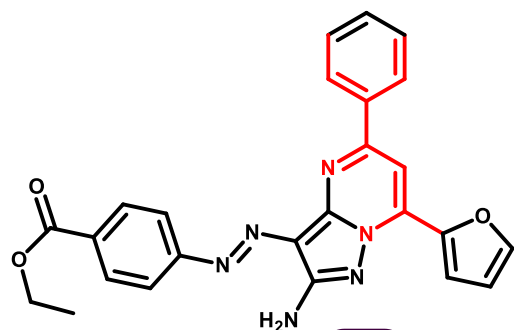

8 b

8.22  
8.21  
8.06  
8.05  
7.98  
7.97  
7.95  
7.92  
7.87  
7.74  
7.73  
7.71  
7.61  
7.60  
7.47  
7.45  
7.44  
6.45  
6.43  
6.41  
6.27

4.31  
4.30  
4.29  
4.27

2.47

1.32  
1.31  
1.29

1.03  
0.89  
3.97  
1.99  
0.94  
1.82  
1.99

1.01  
1.66

1.90

2.99

f1 (ppm)

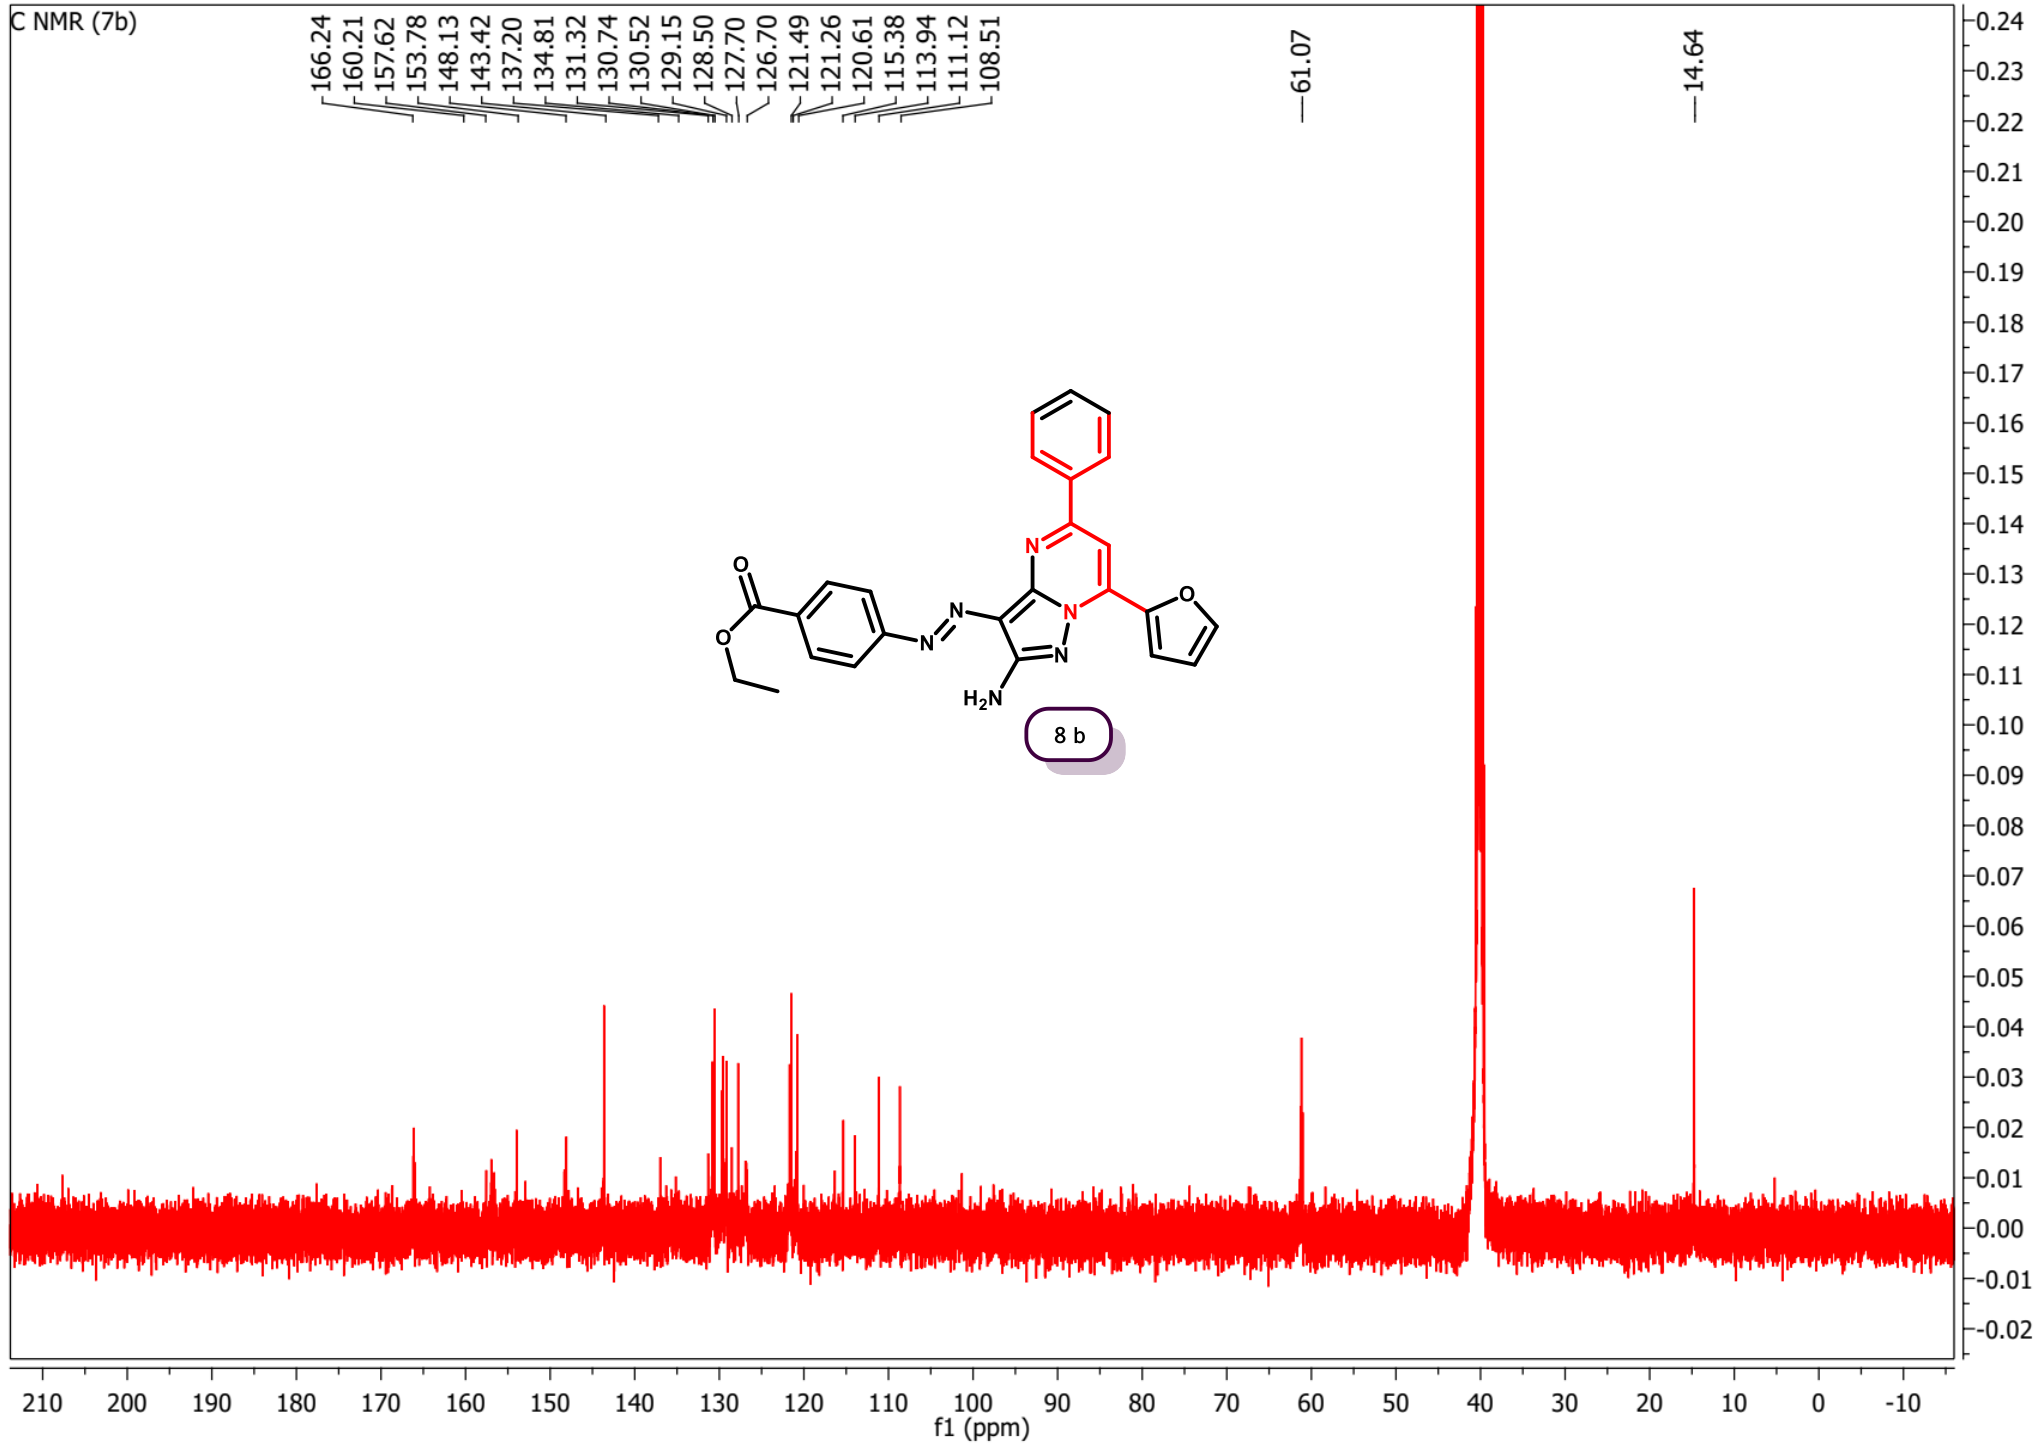

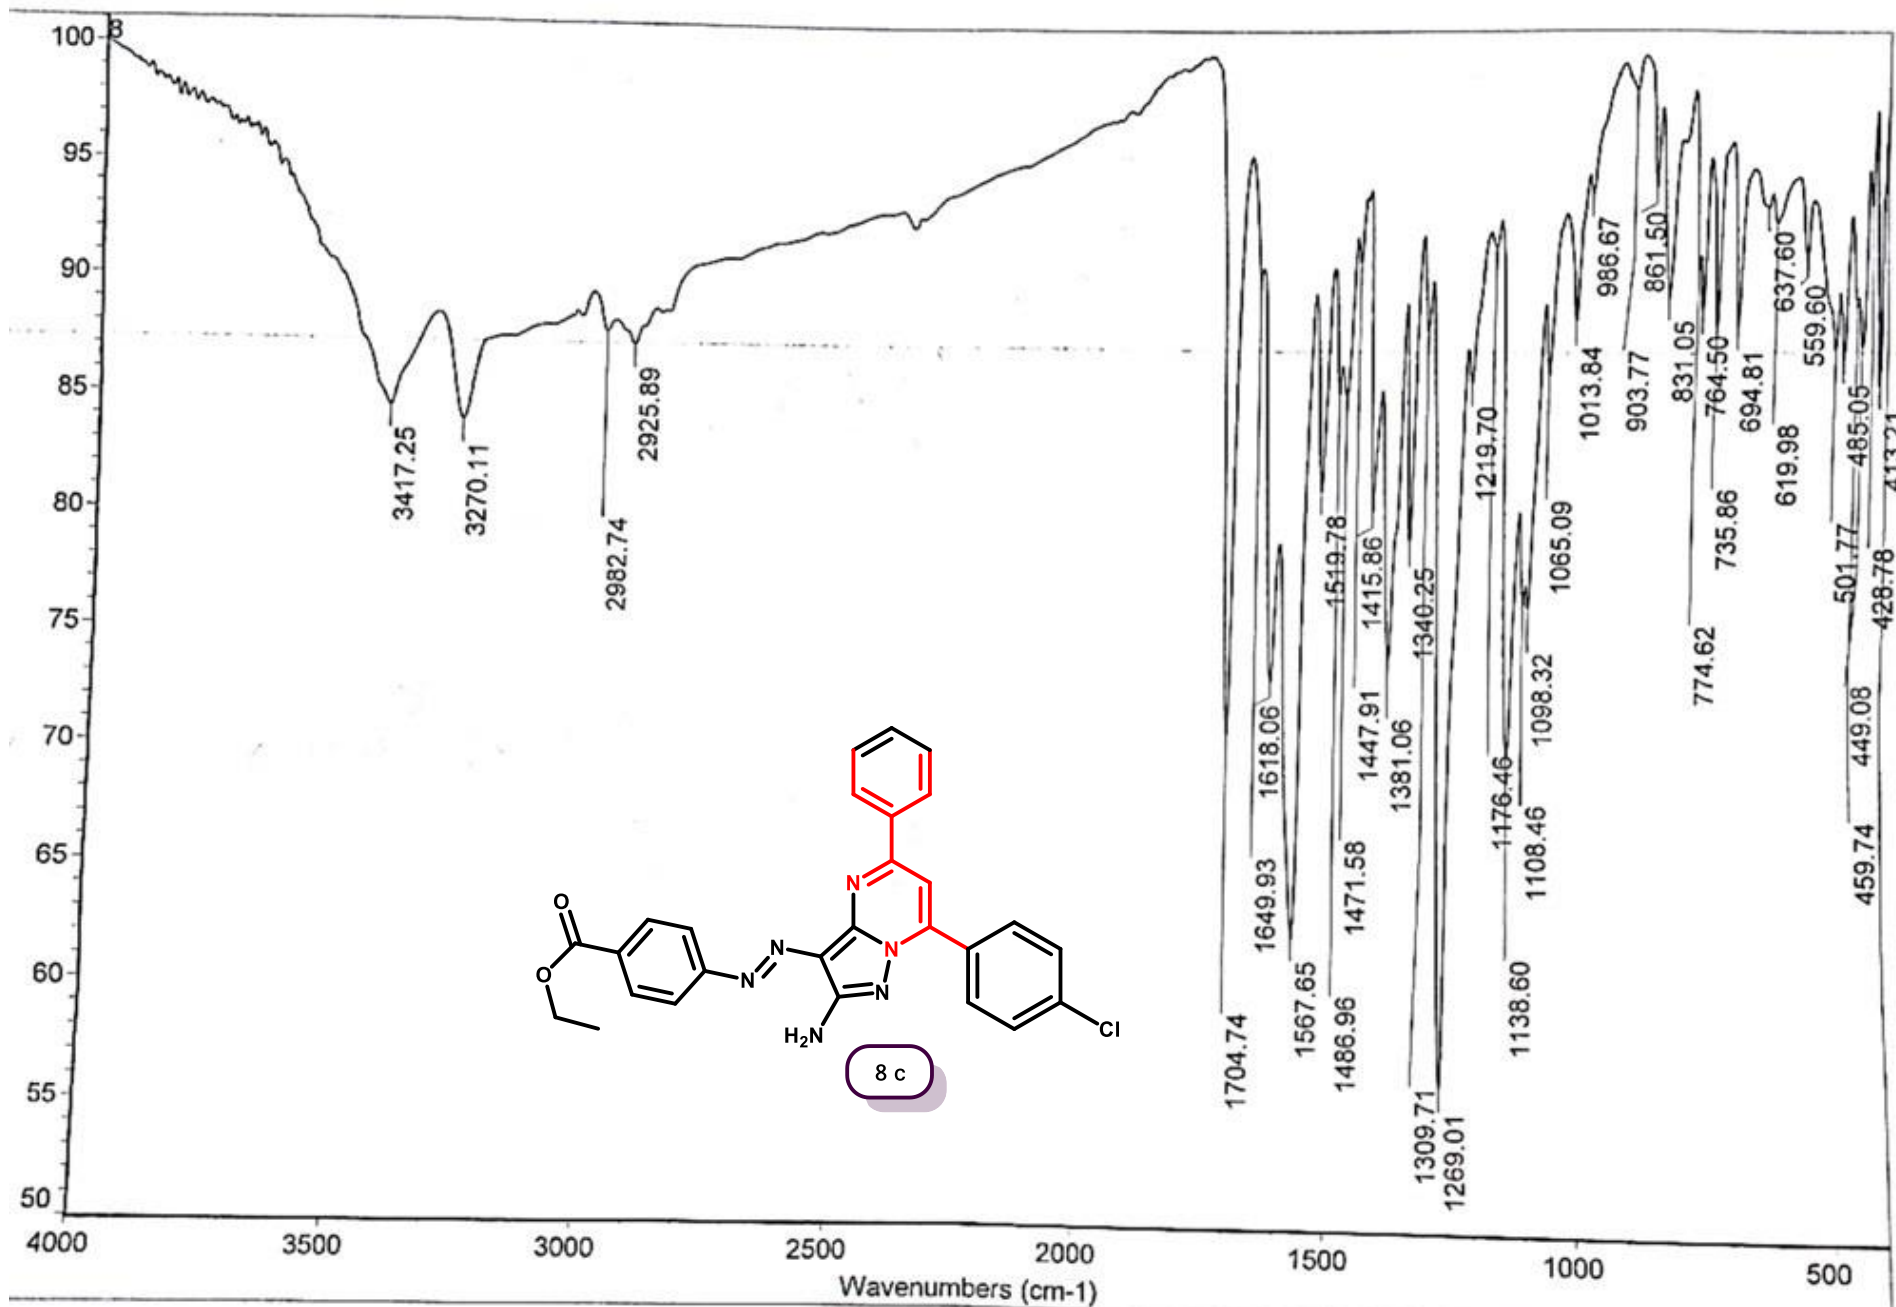

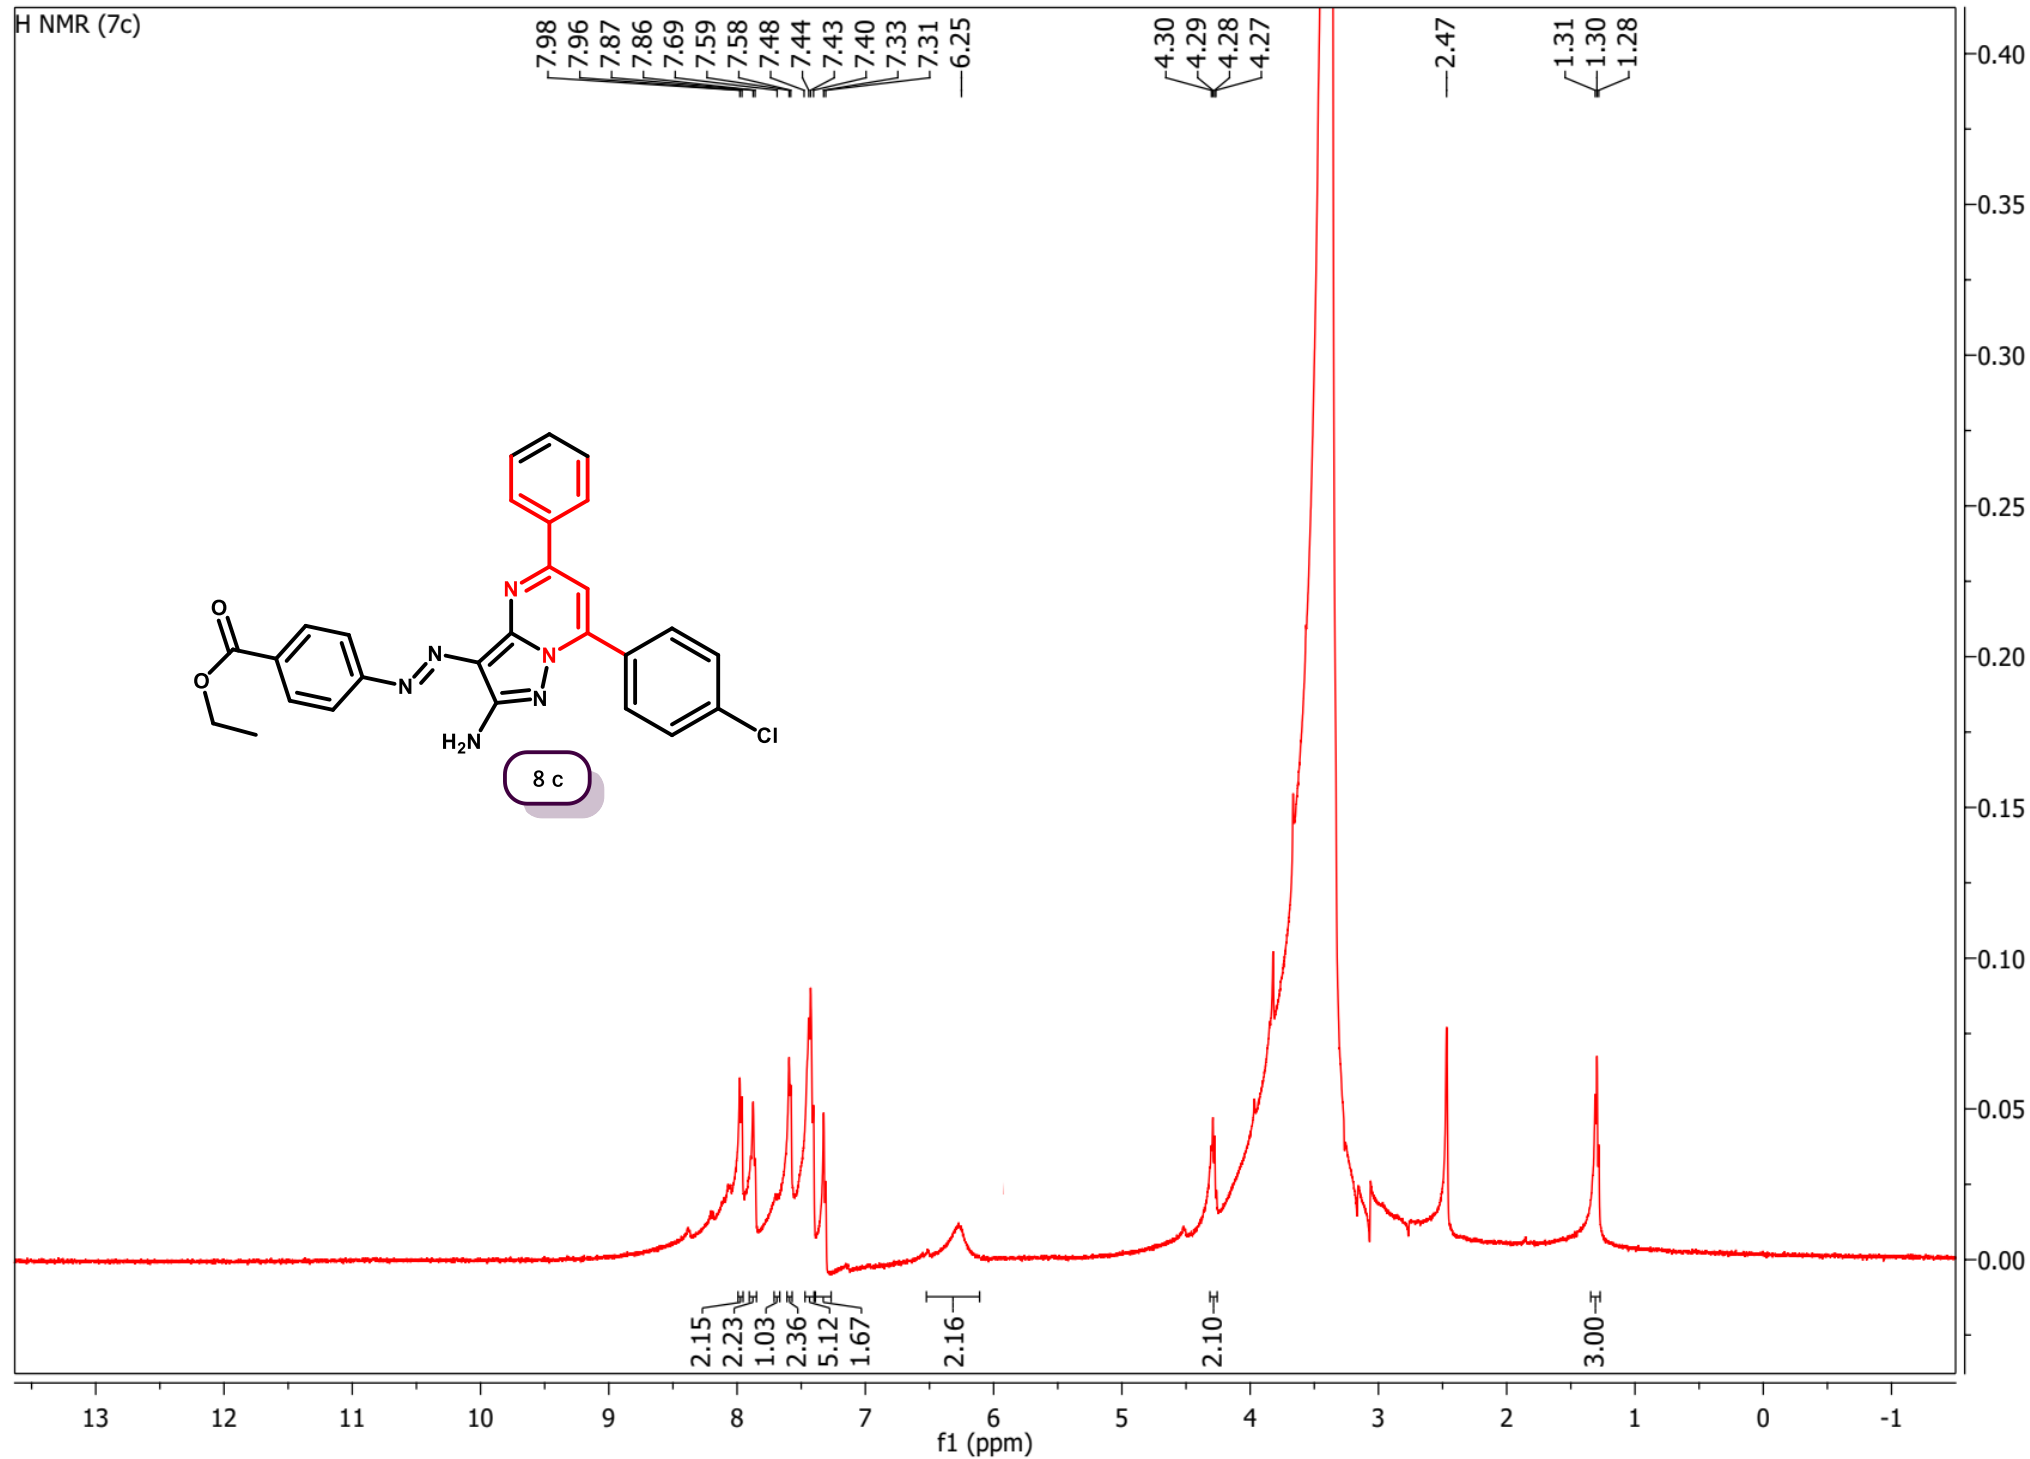

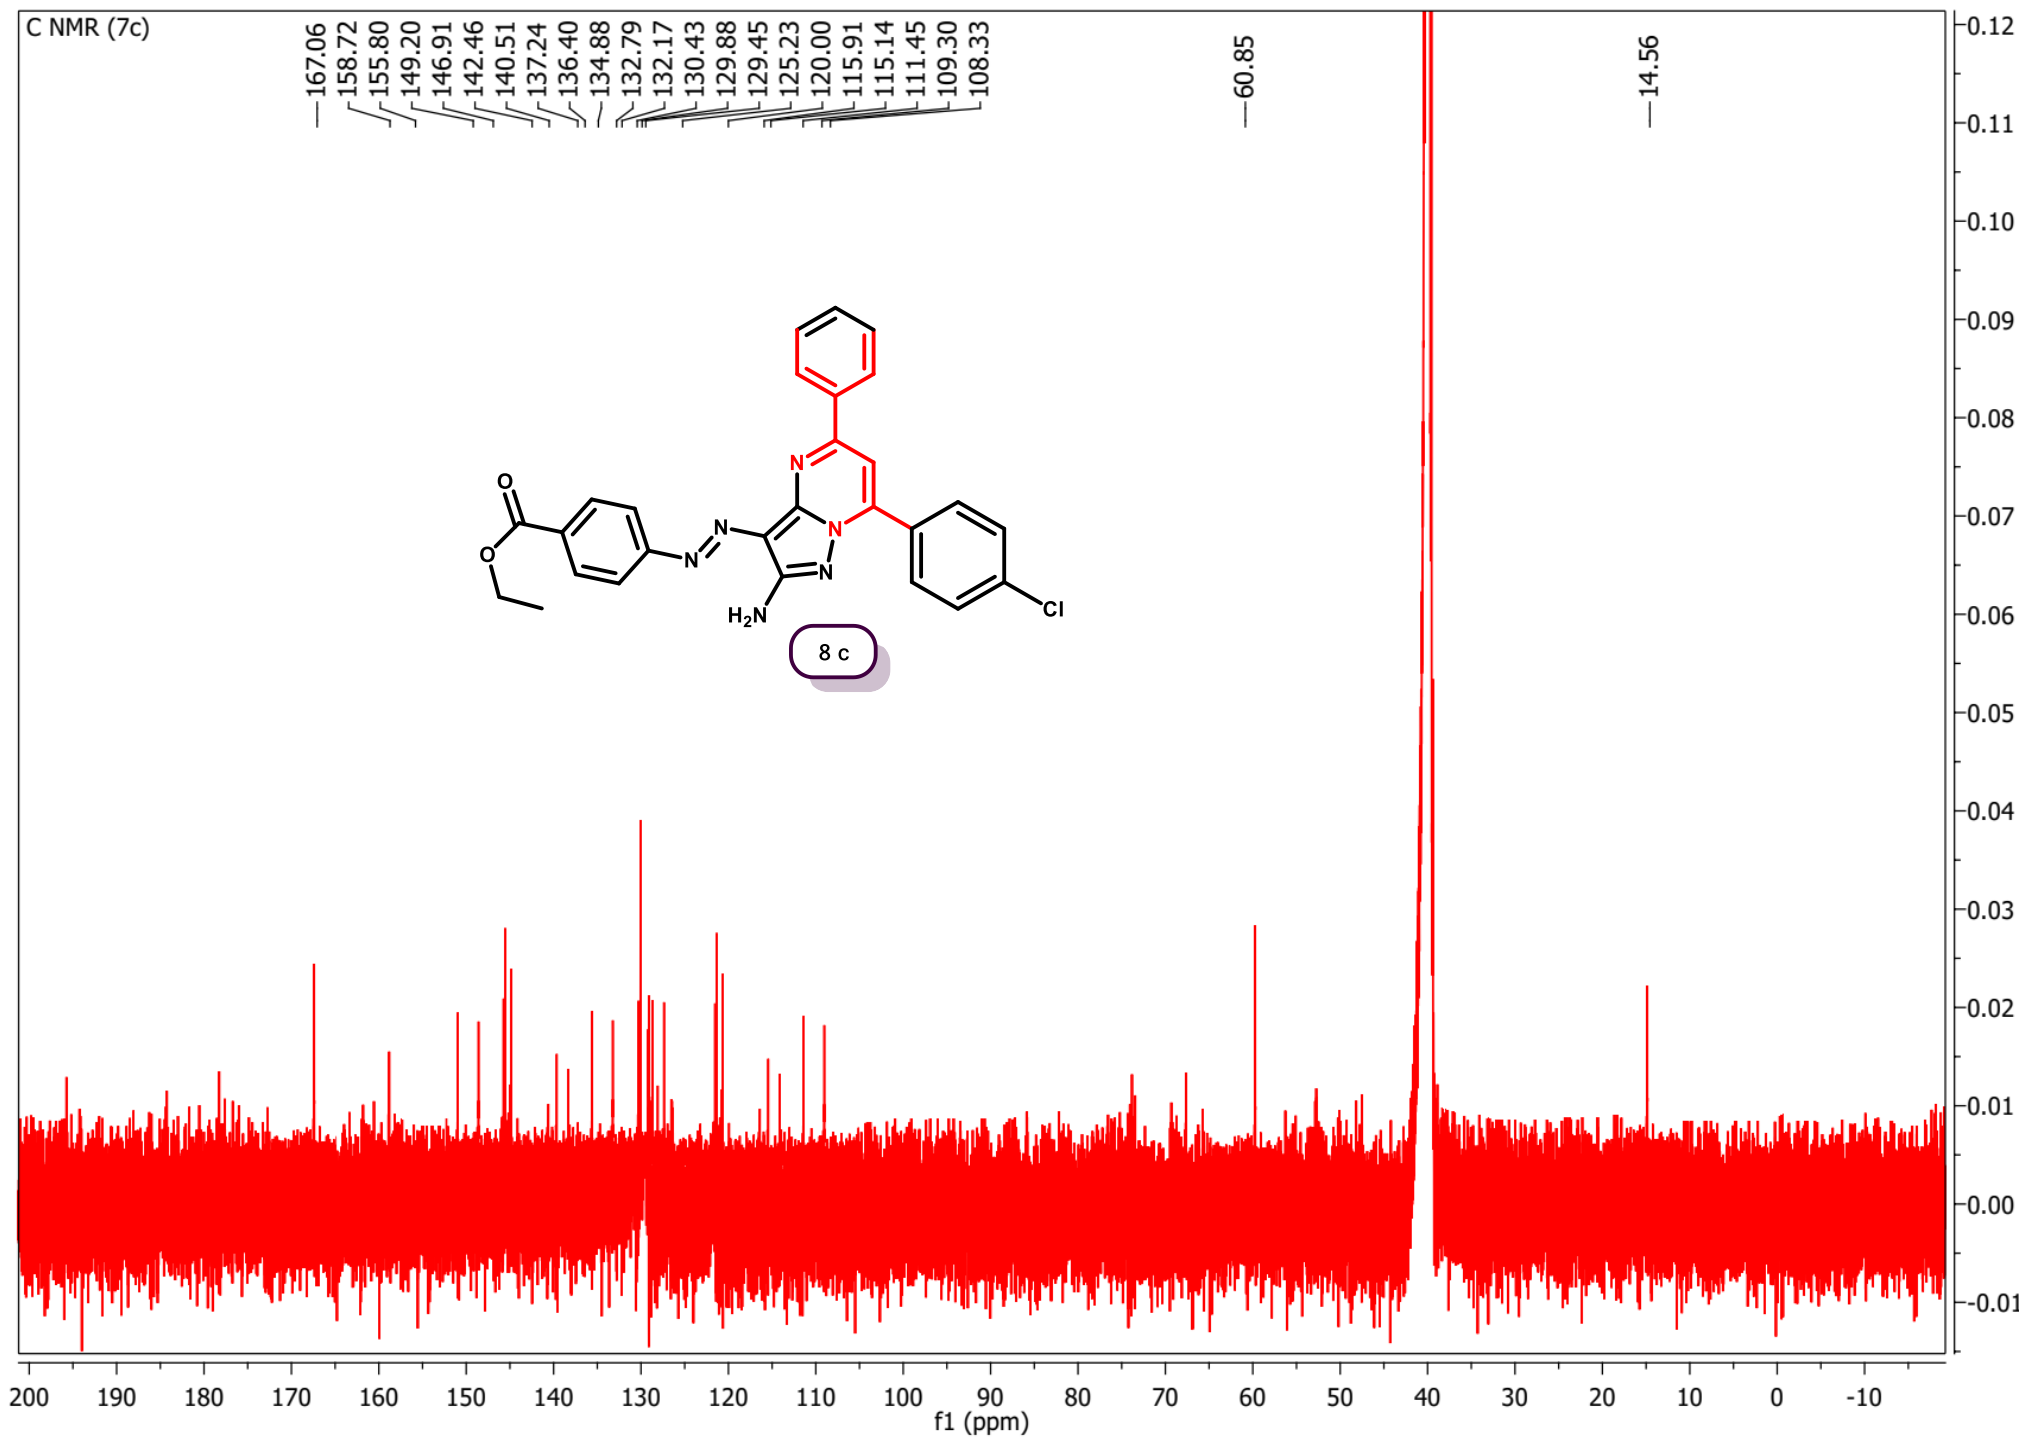

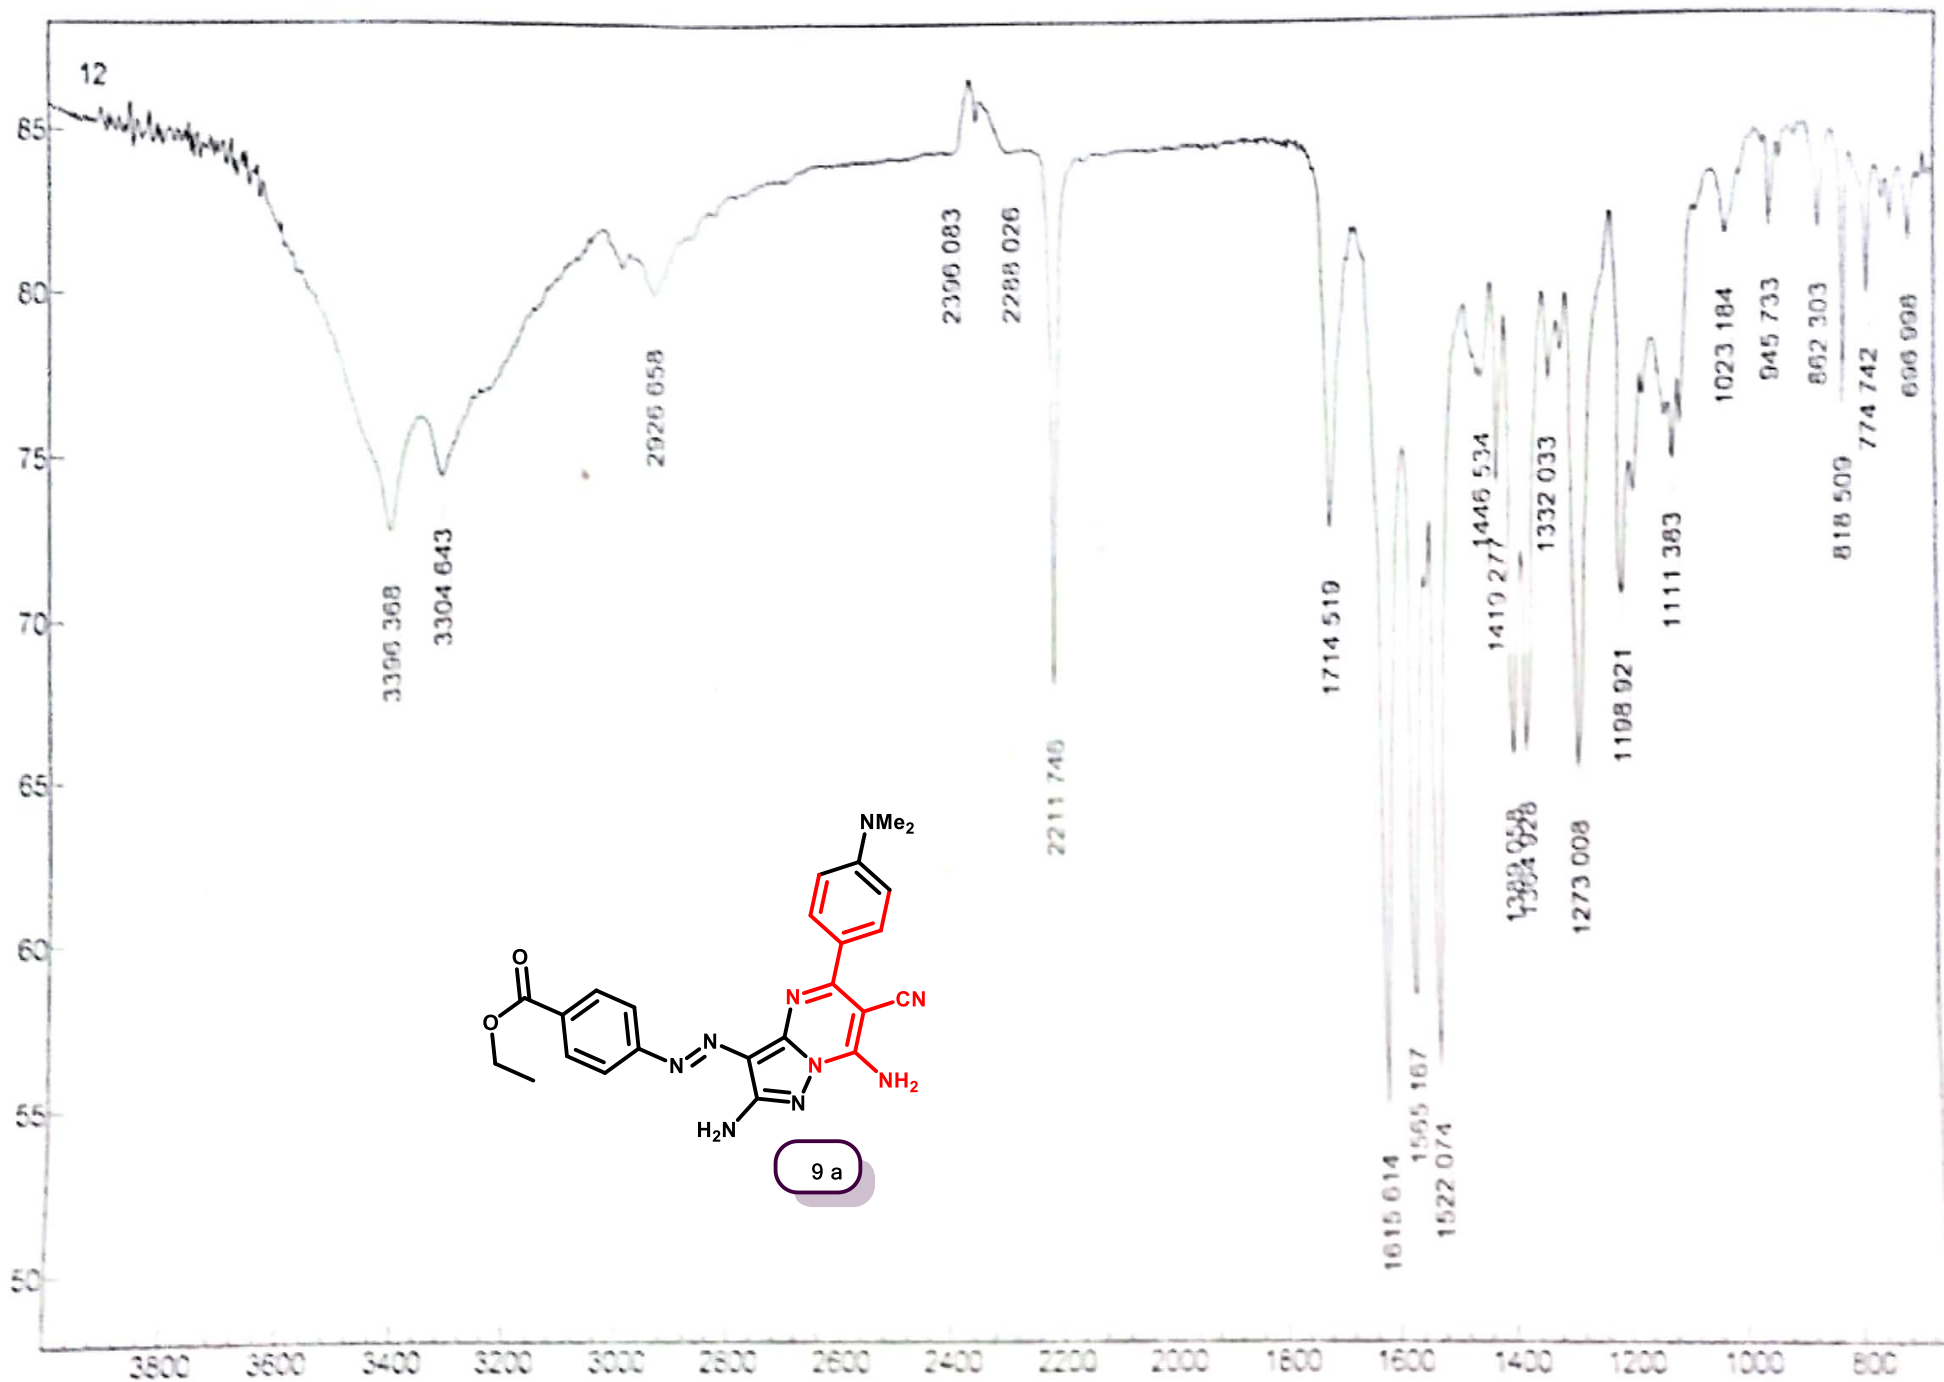

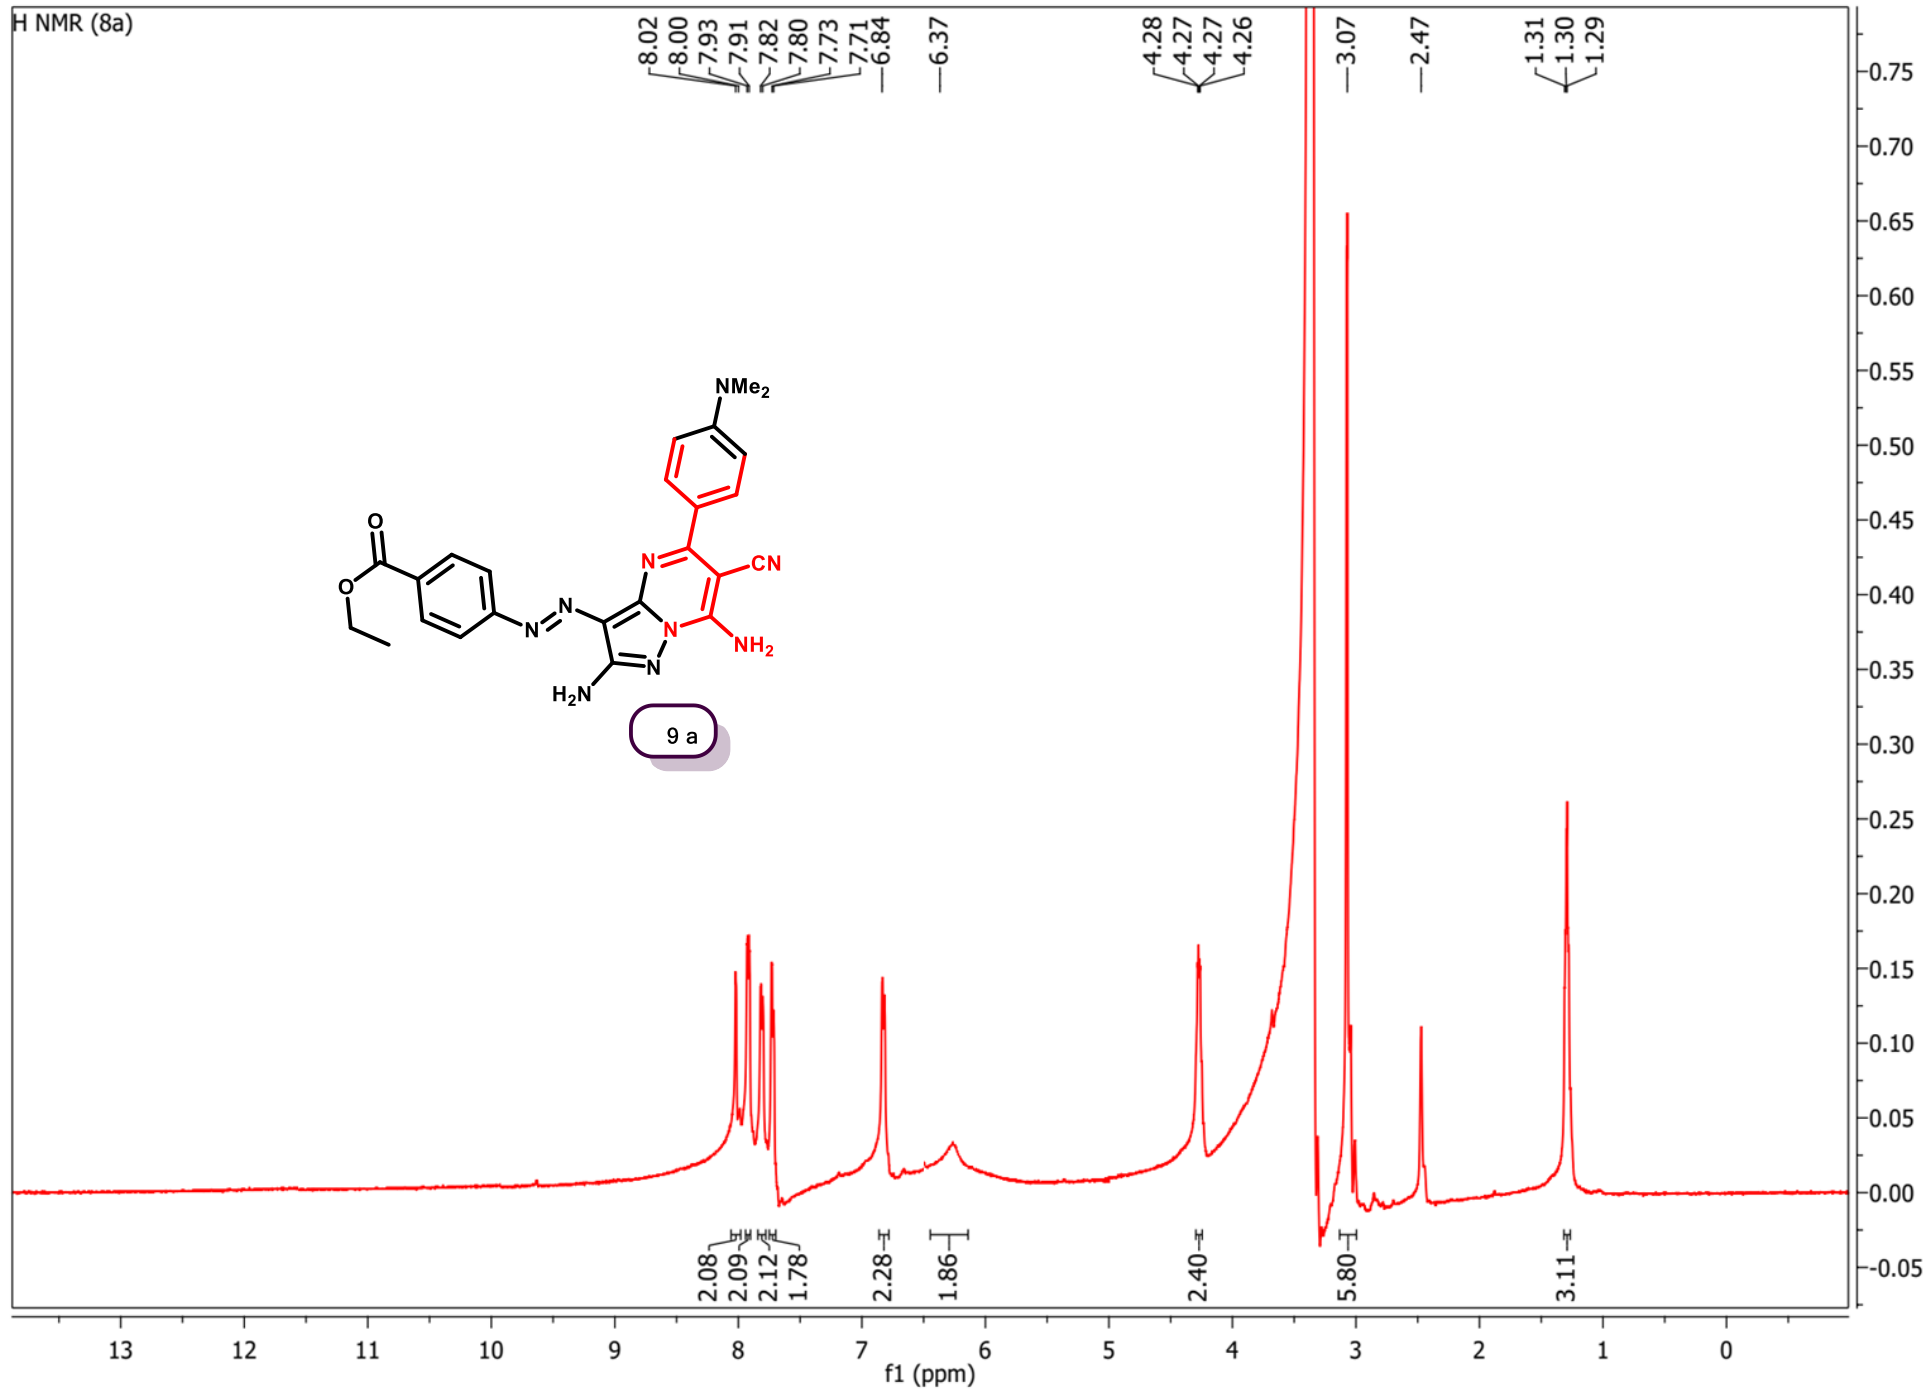

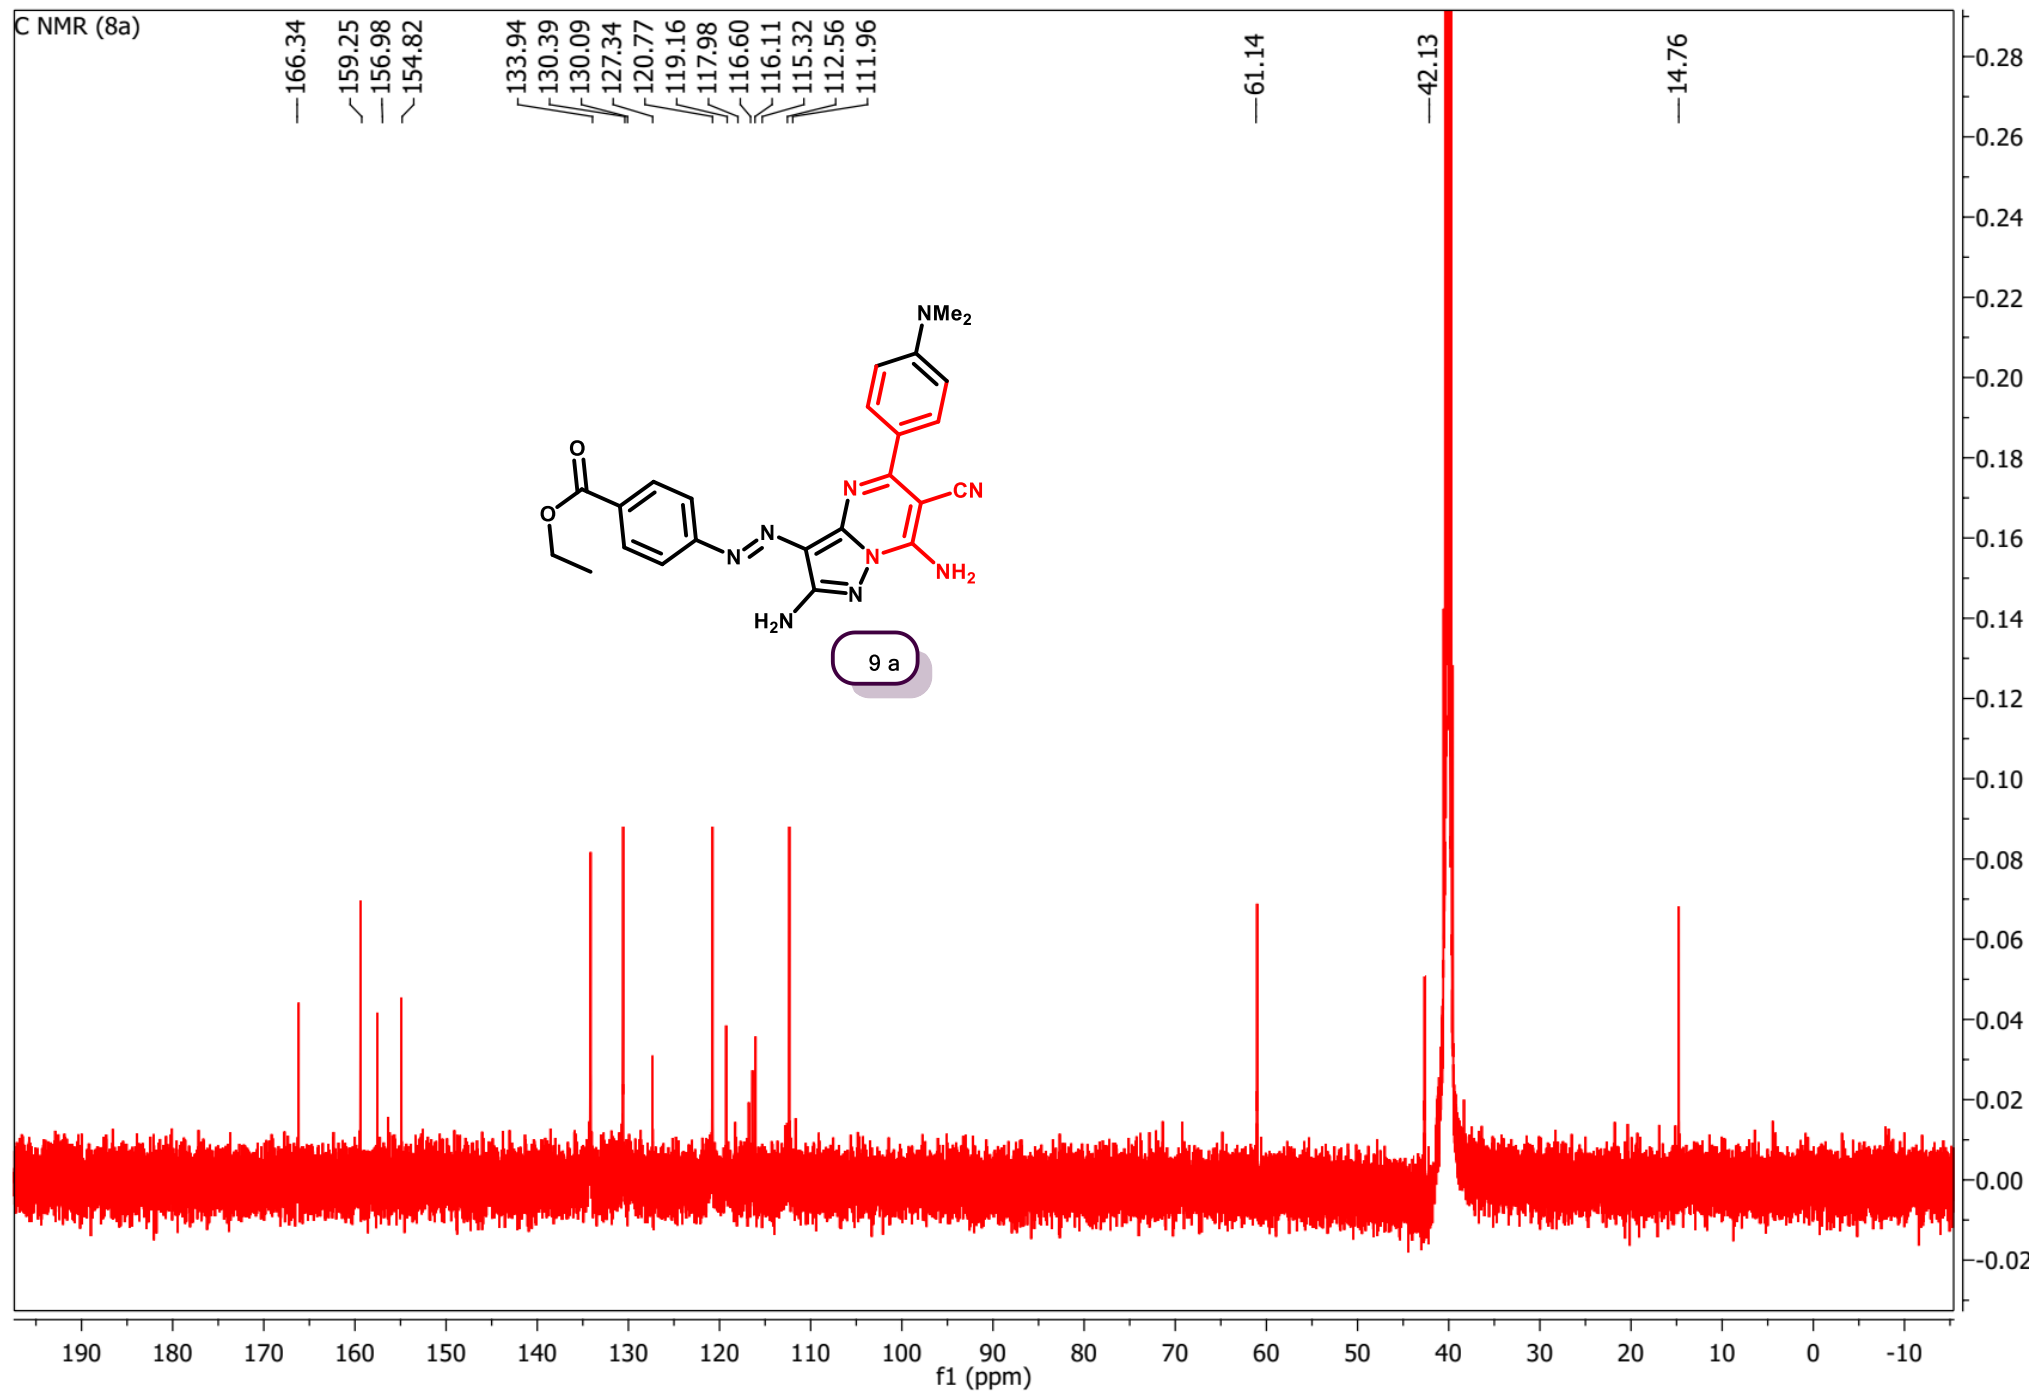

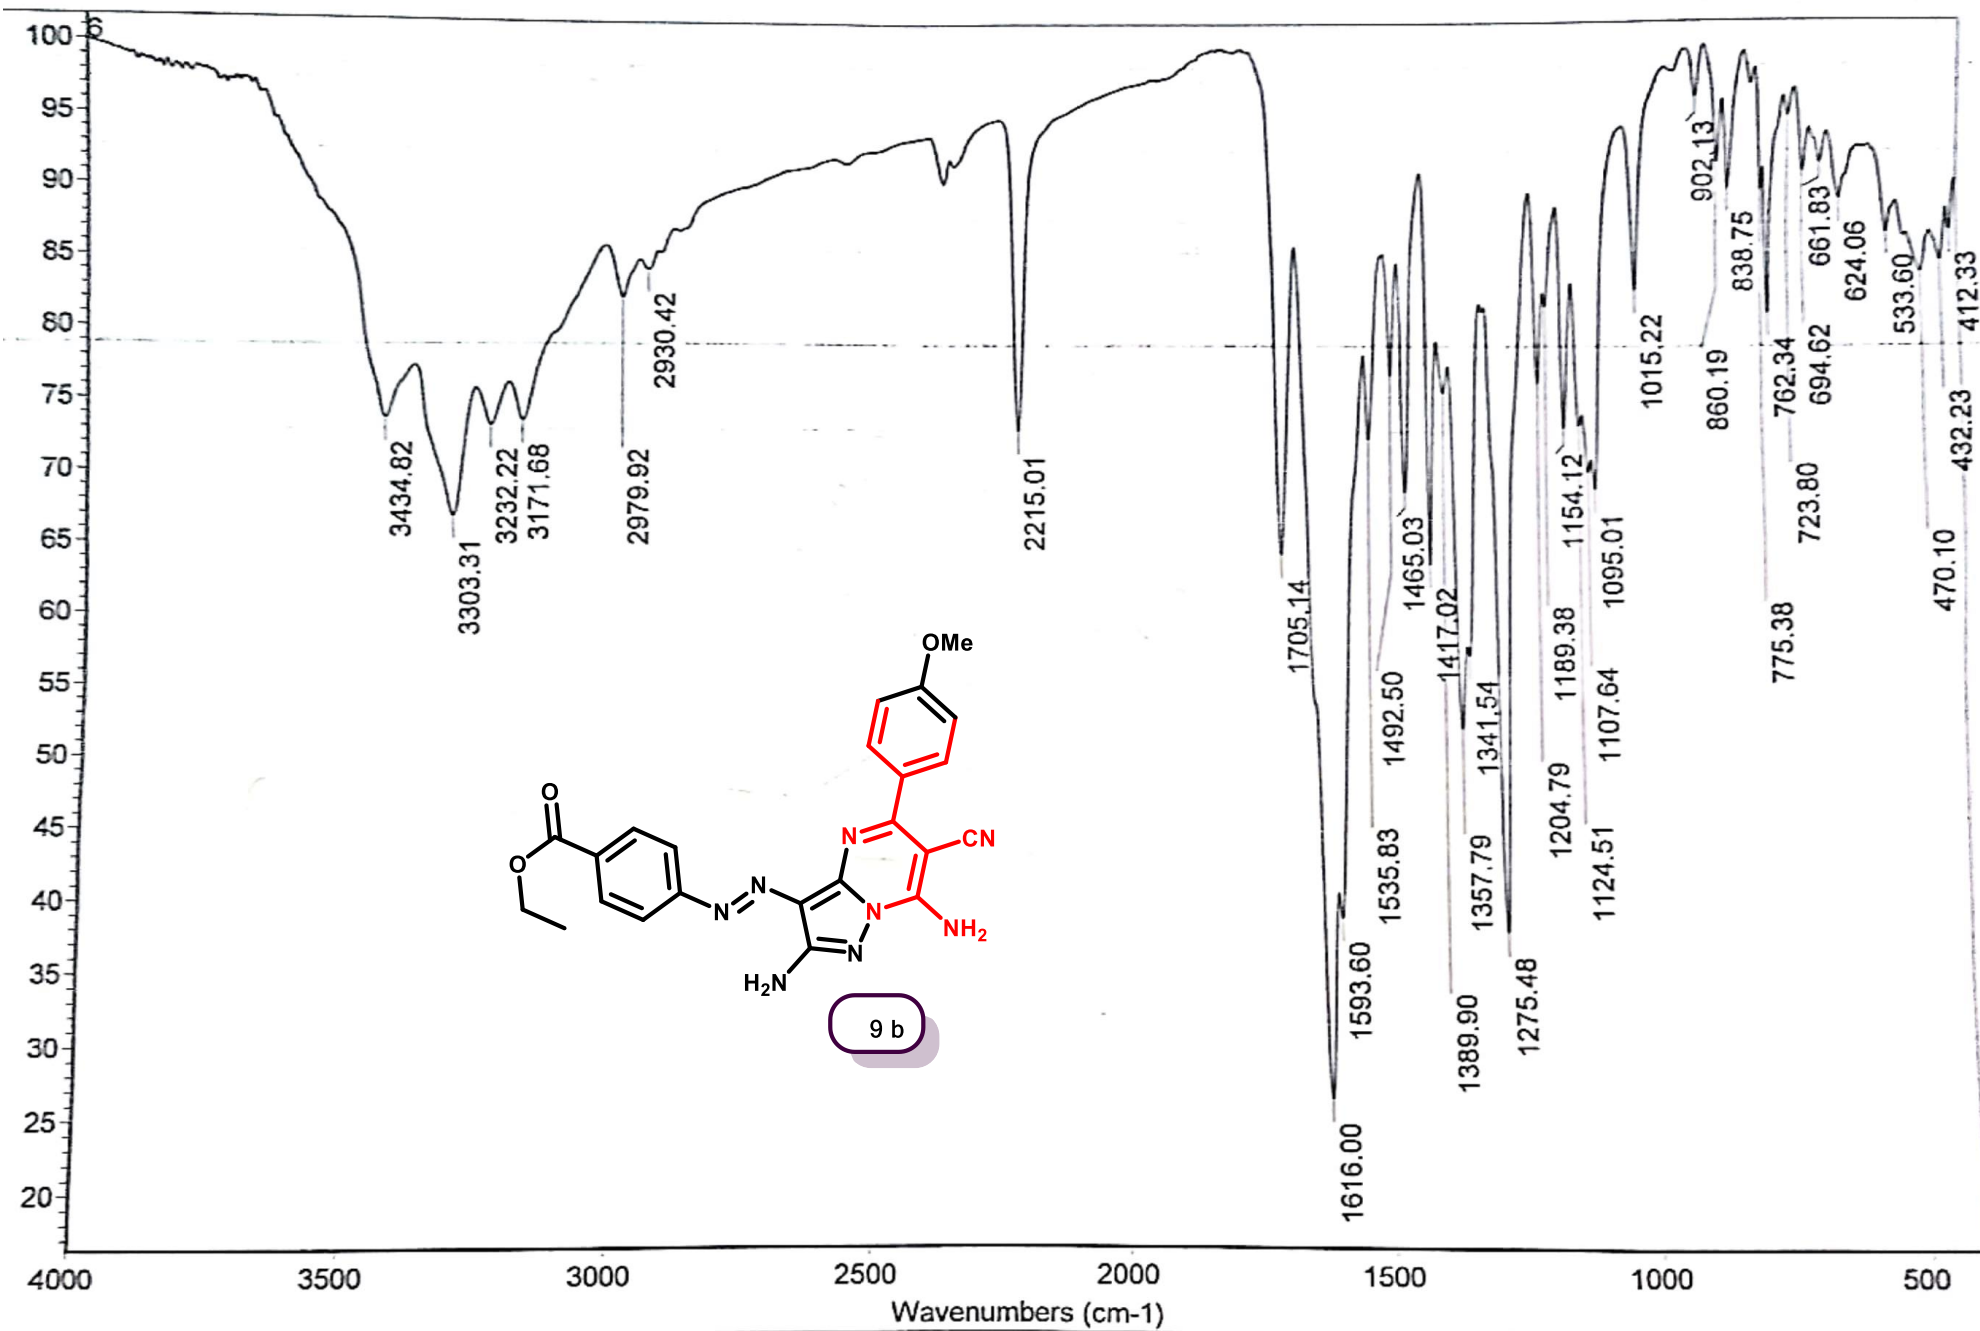

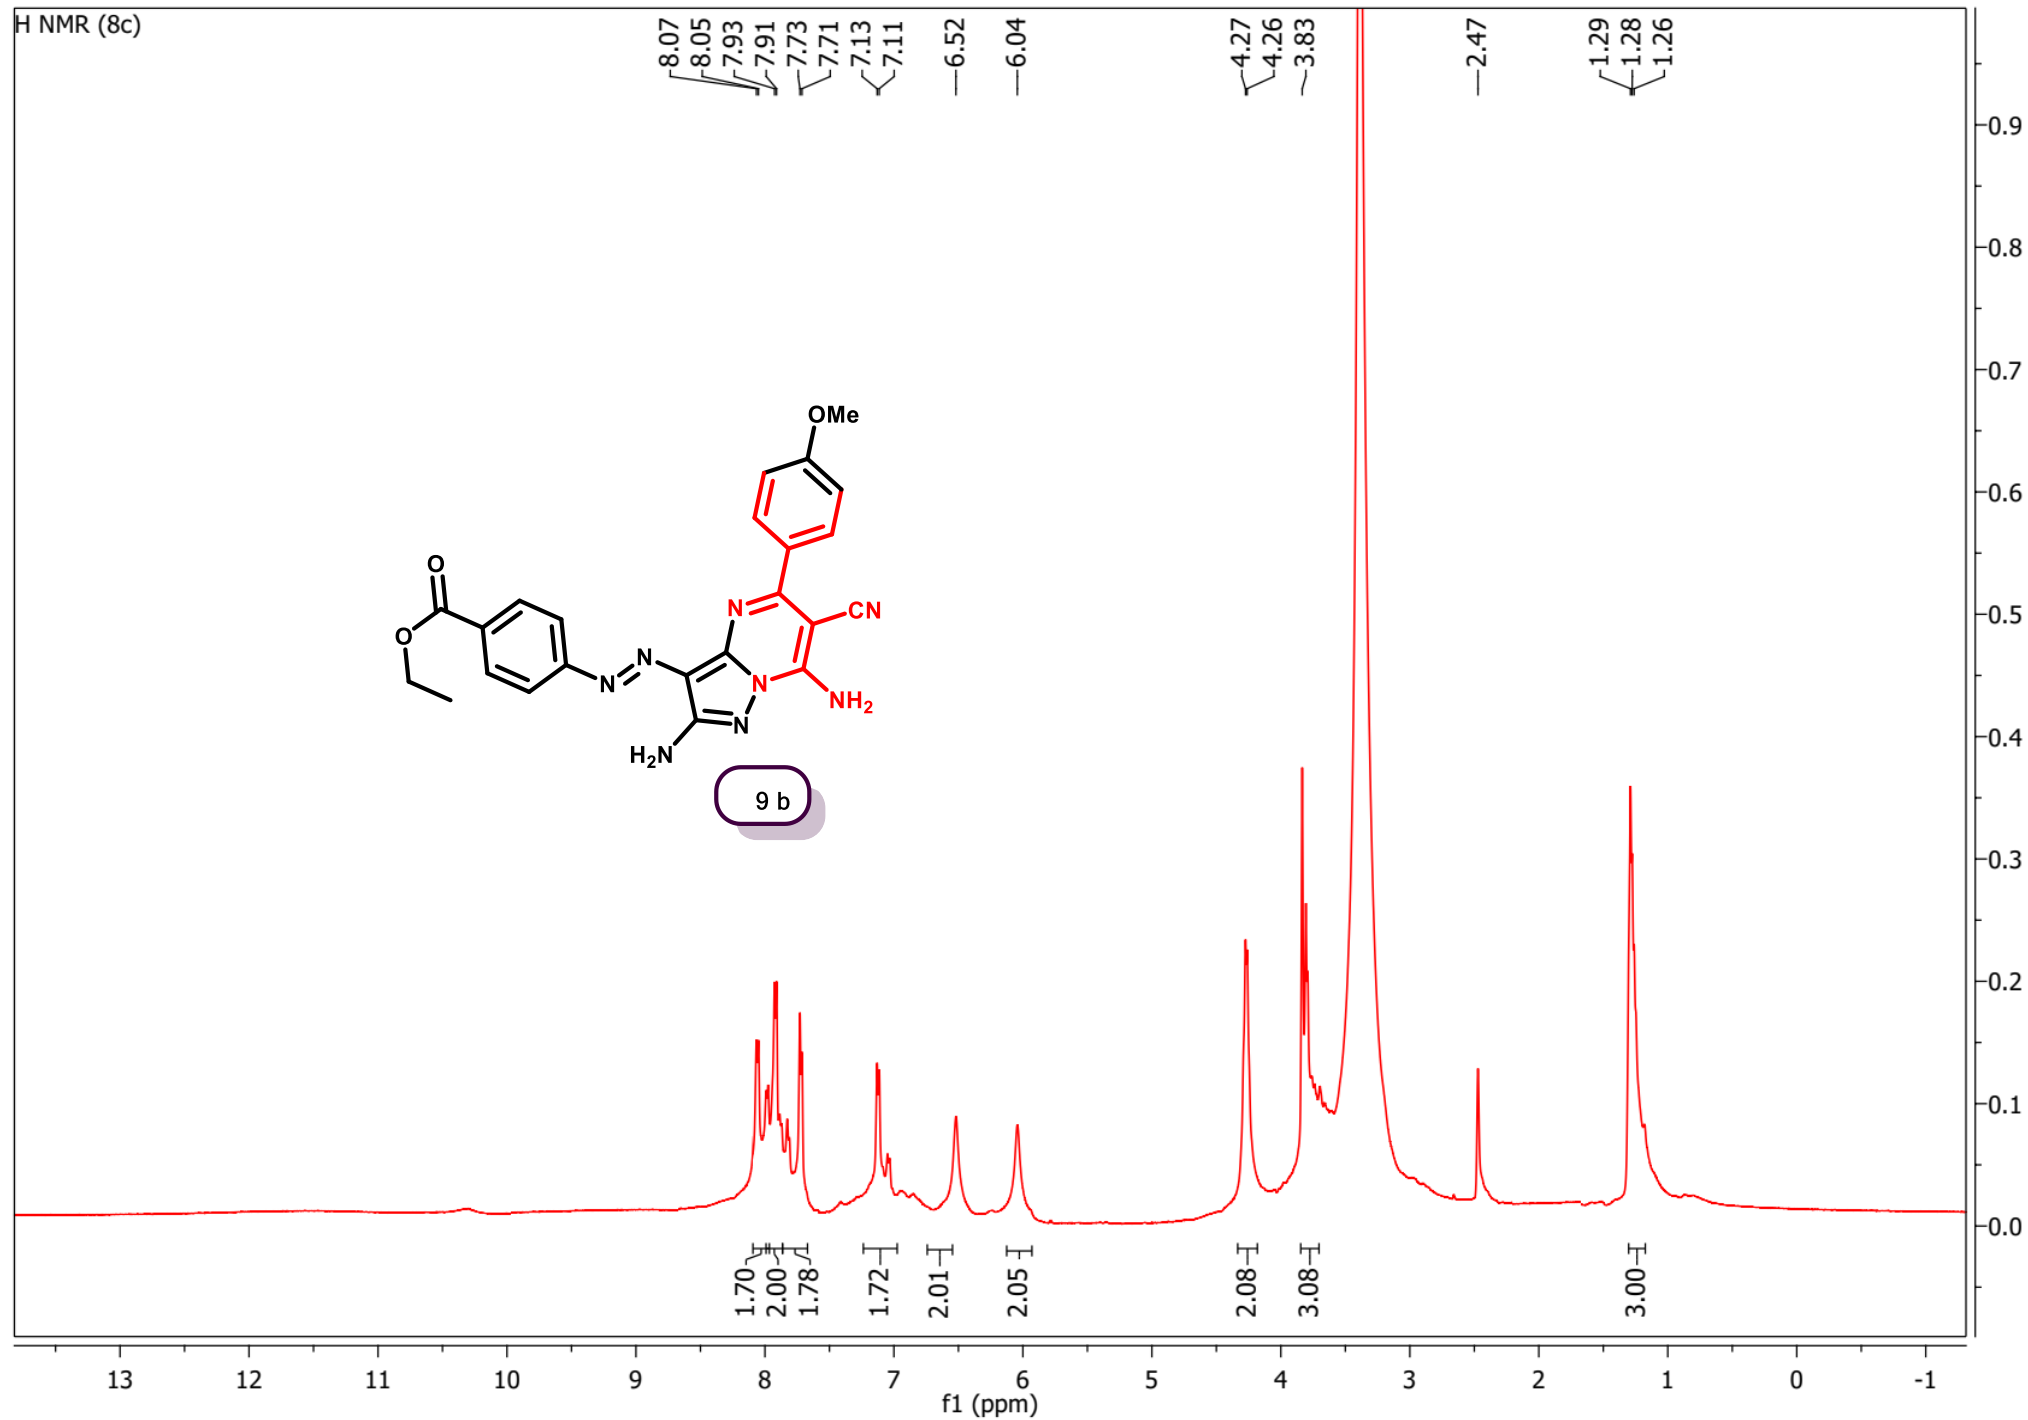

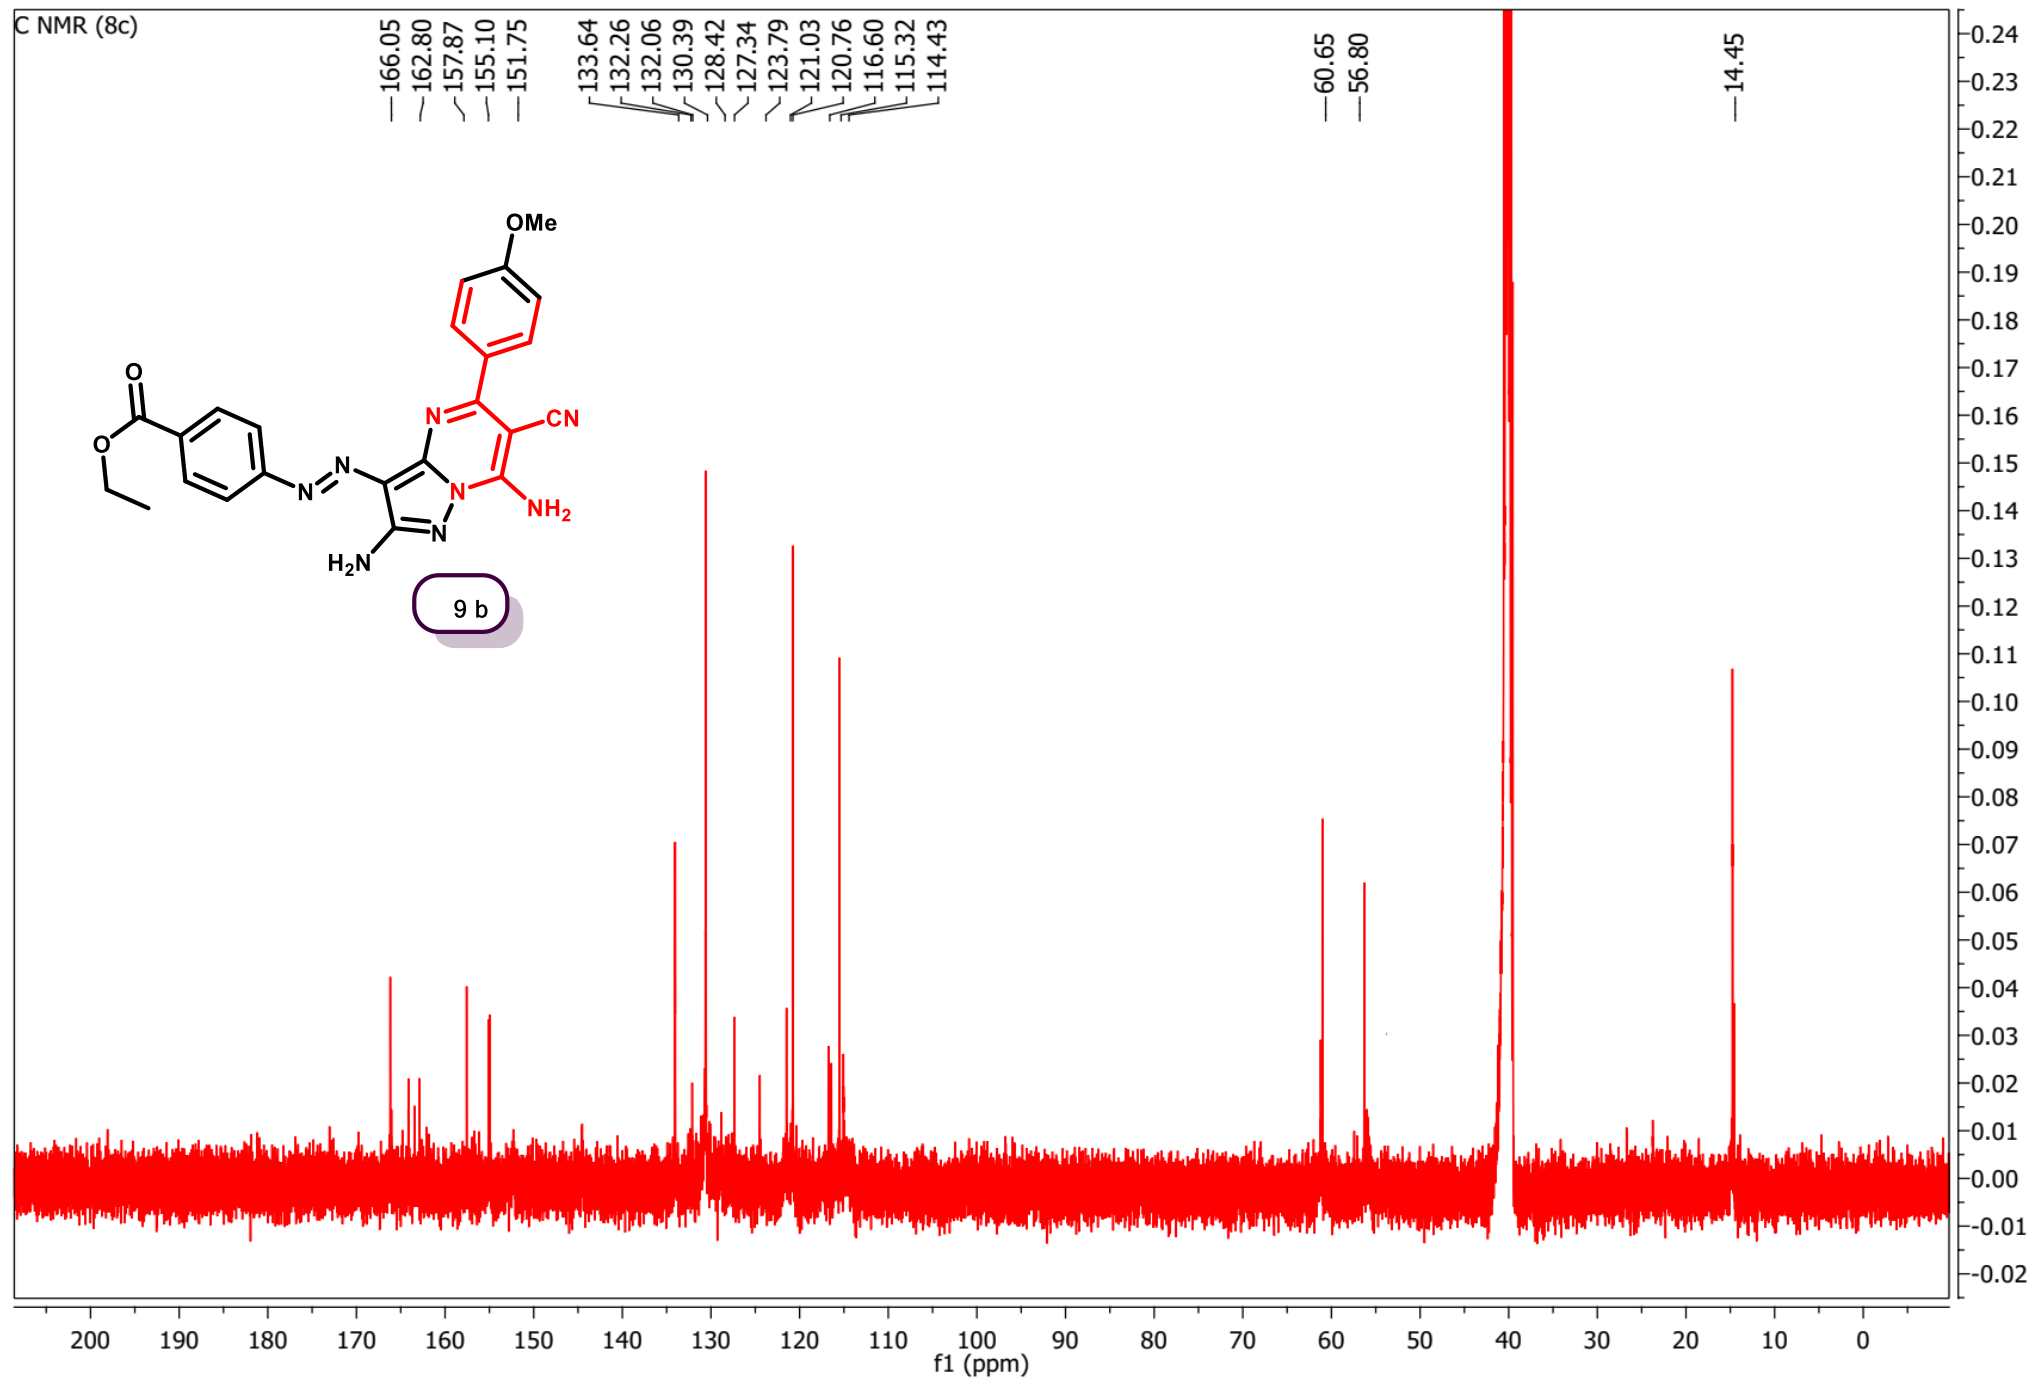

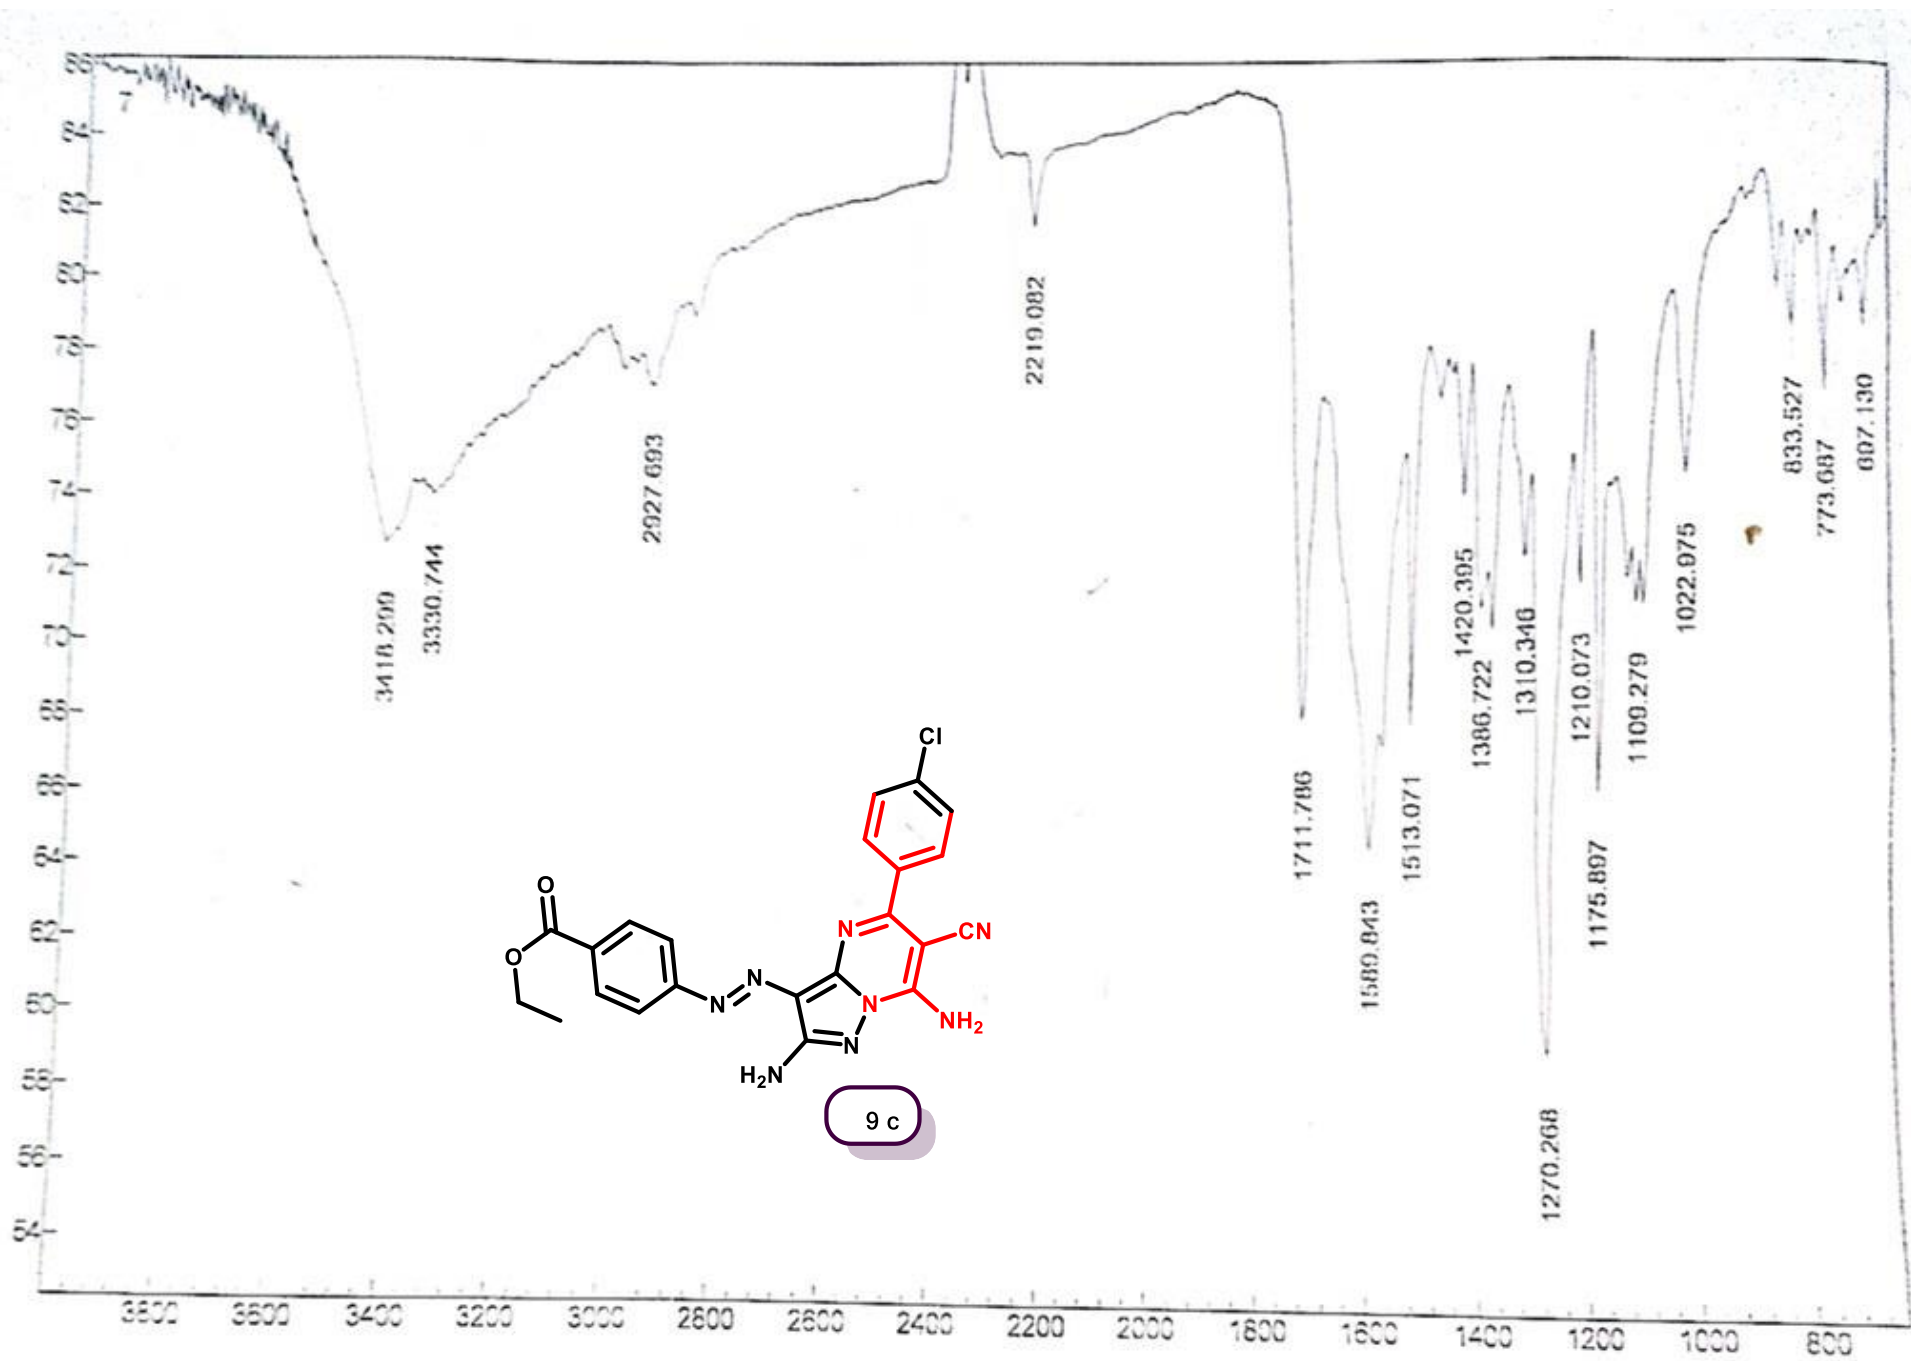

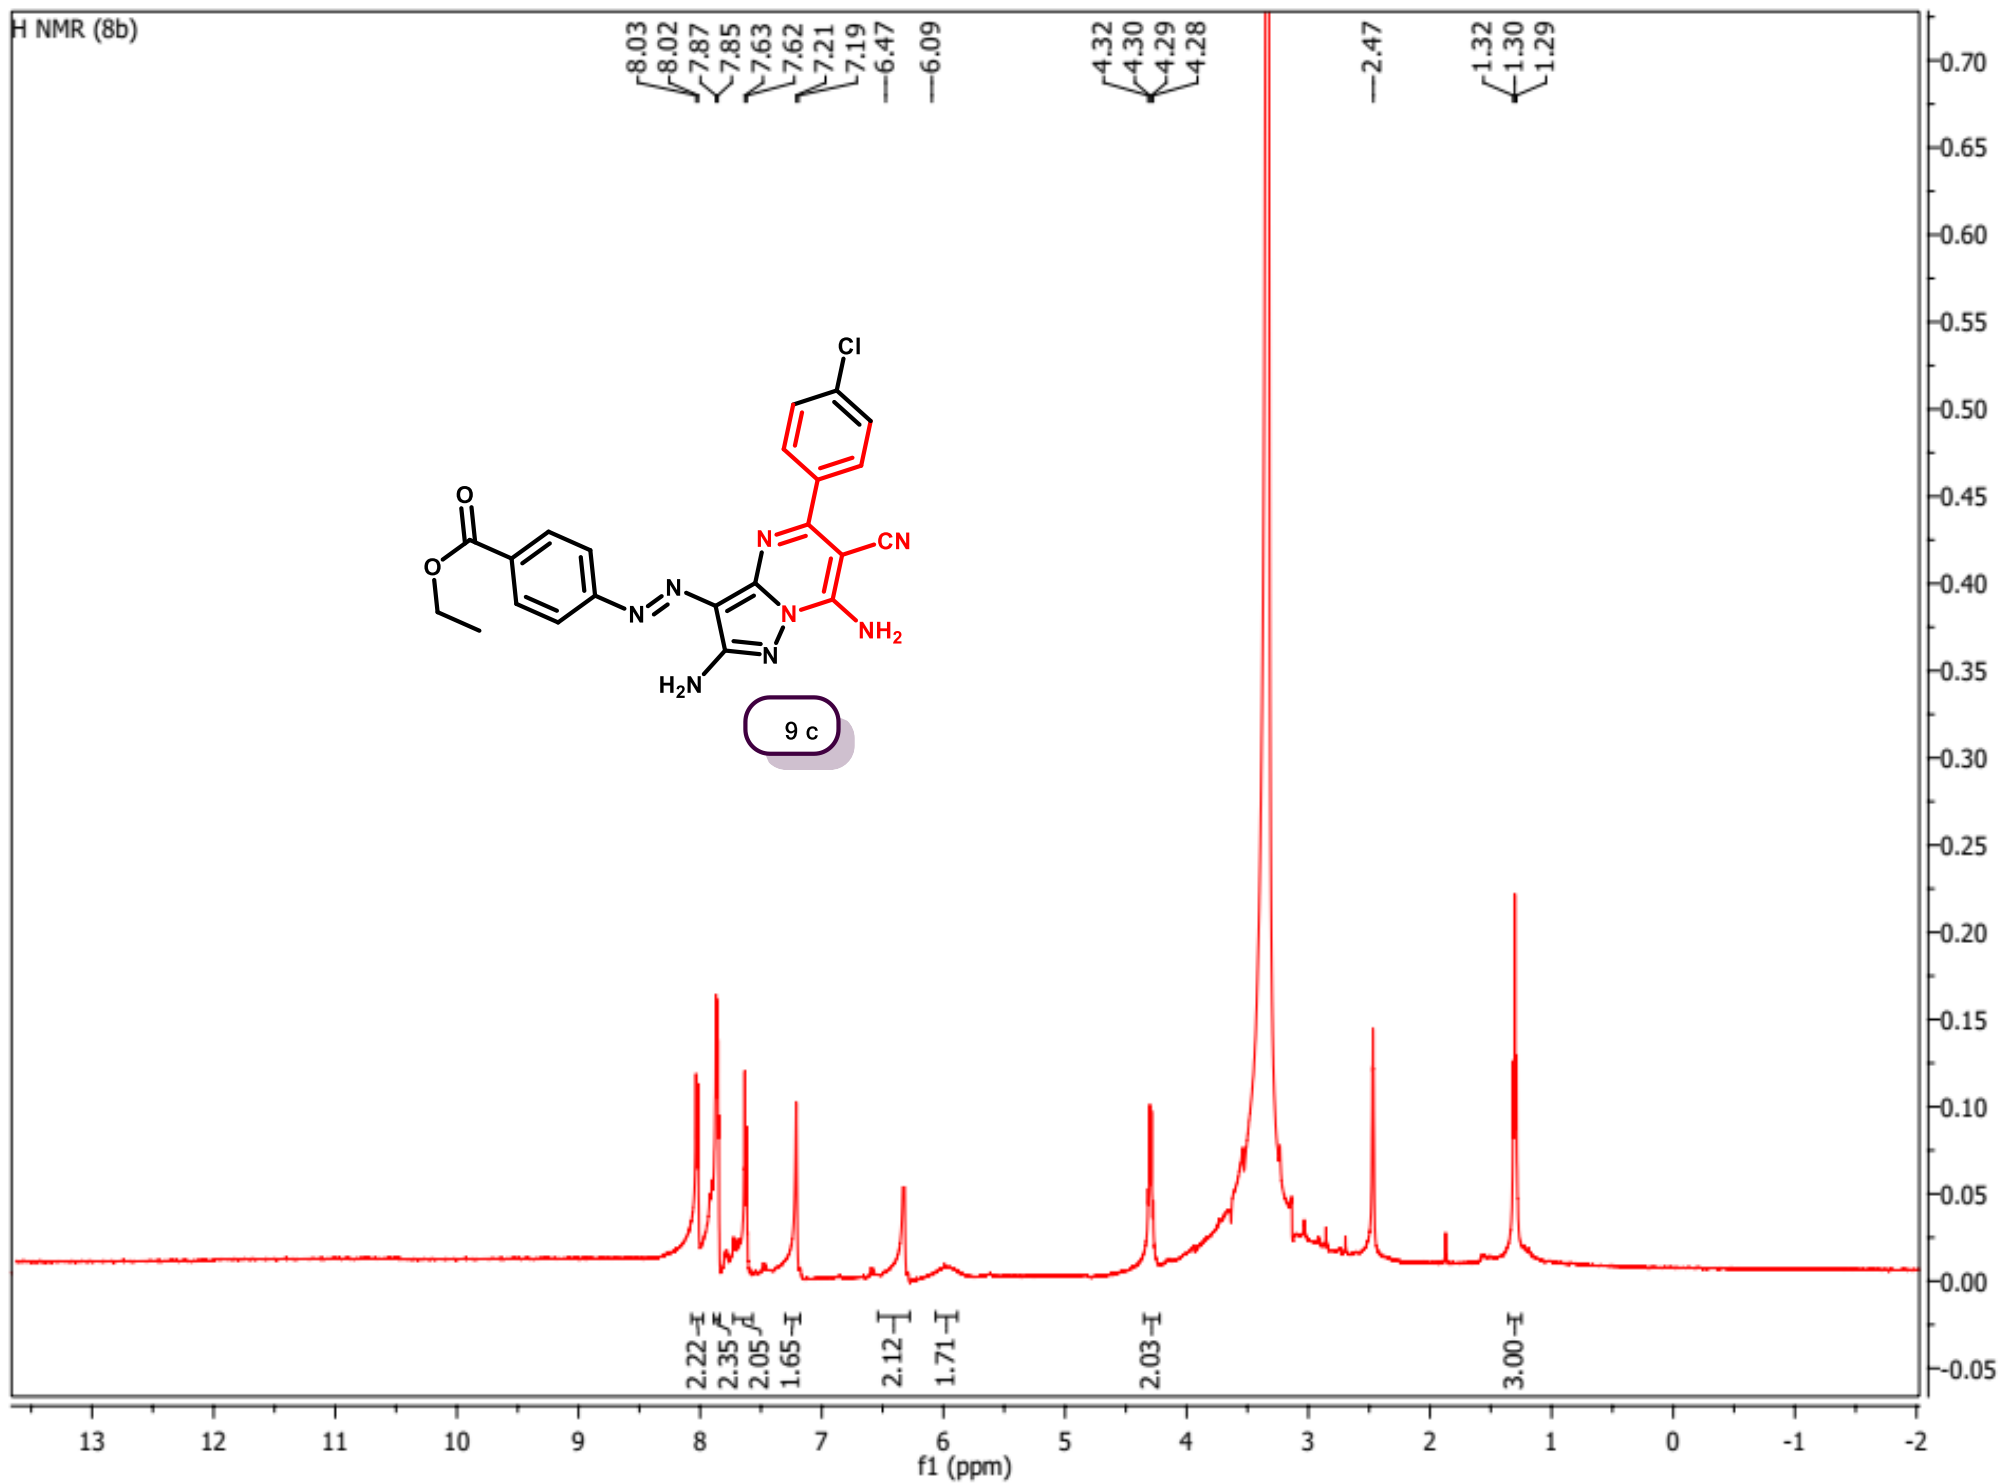

C NMR (8b)

165.56  
158.95  
157.57  
155.11

134.06  
132.83  
130.44  
127.22  
124.89  
123.28  
120.77  
119.15  
118.05  
116.64  
116.05  
112.31  
108.70

14.45

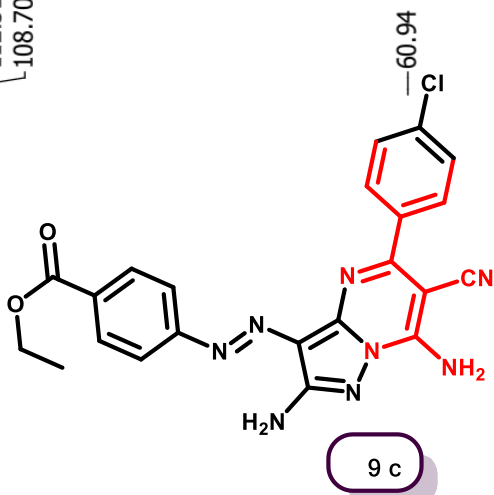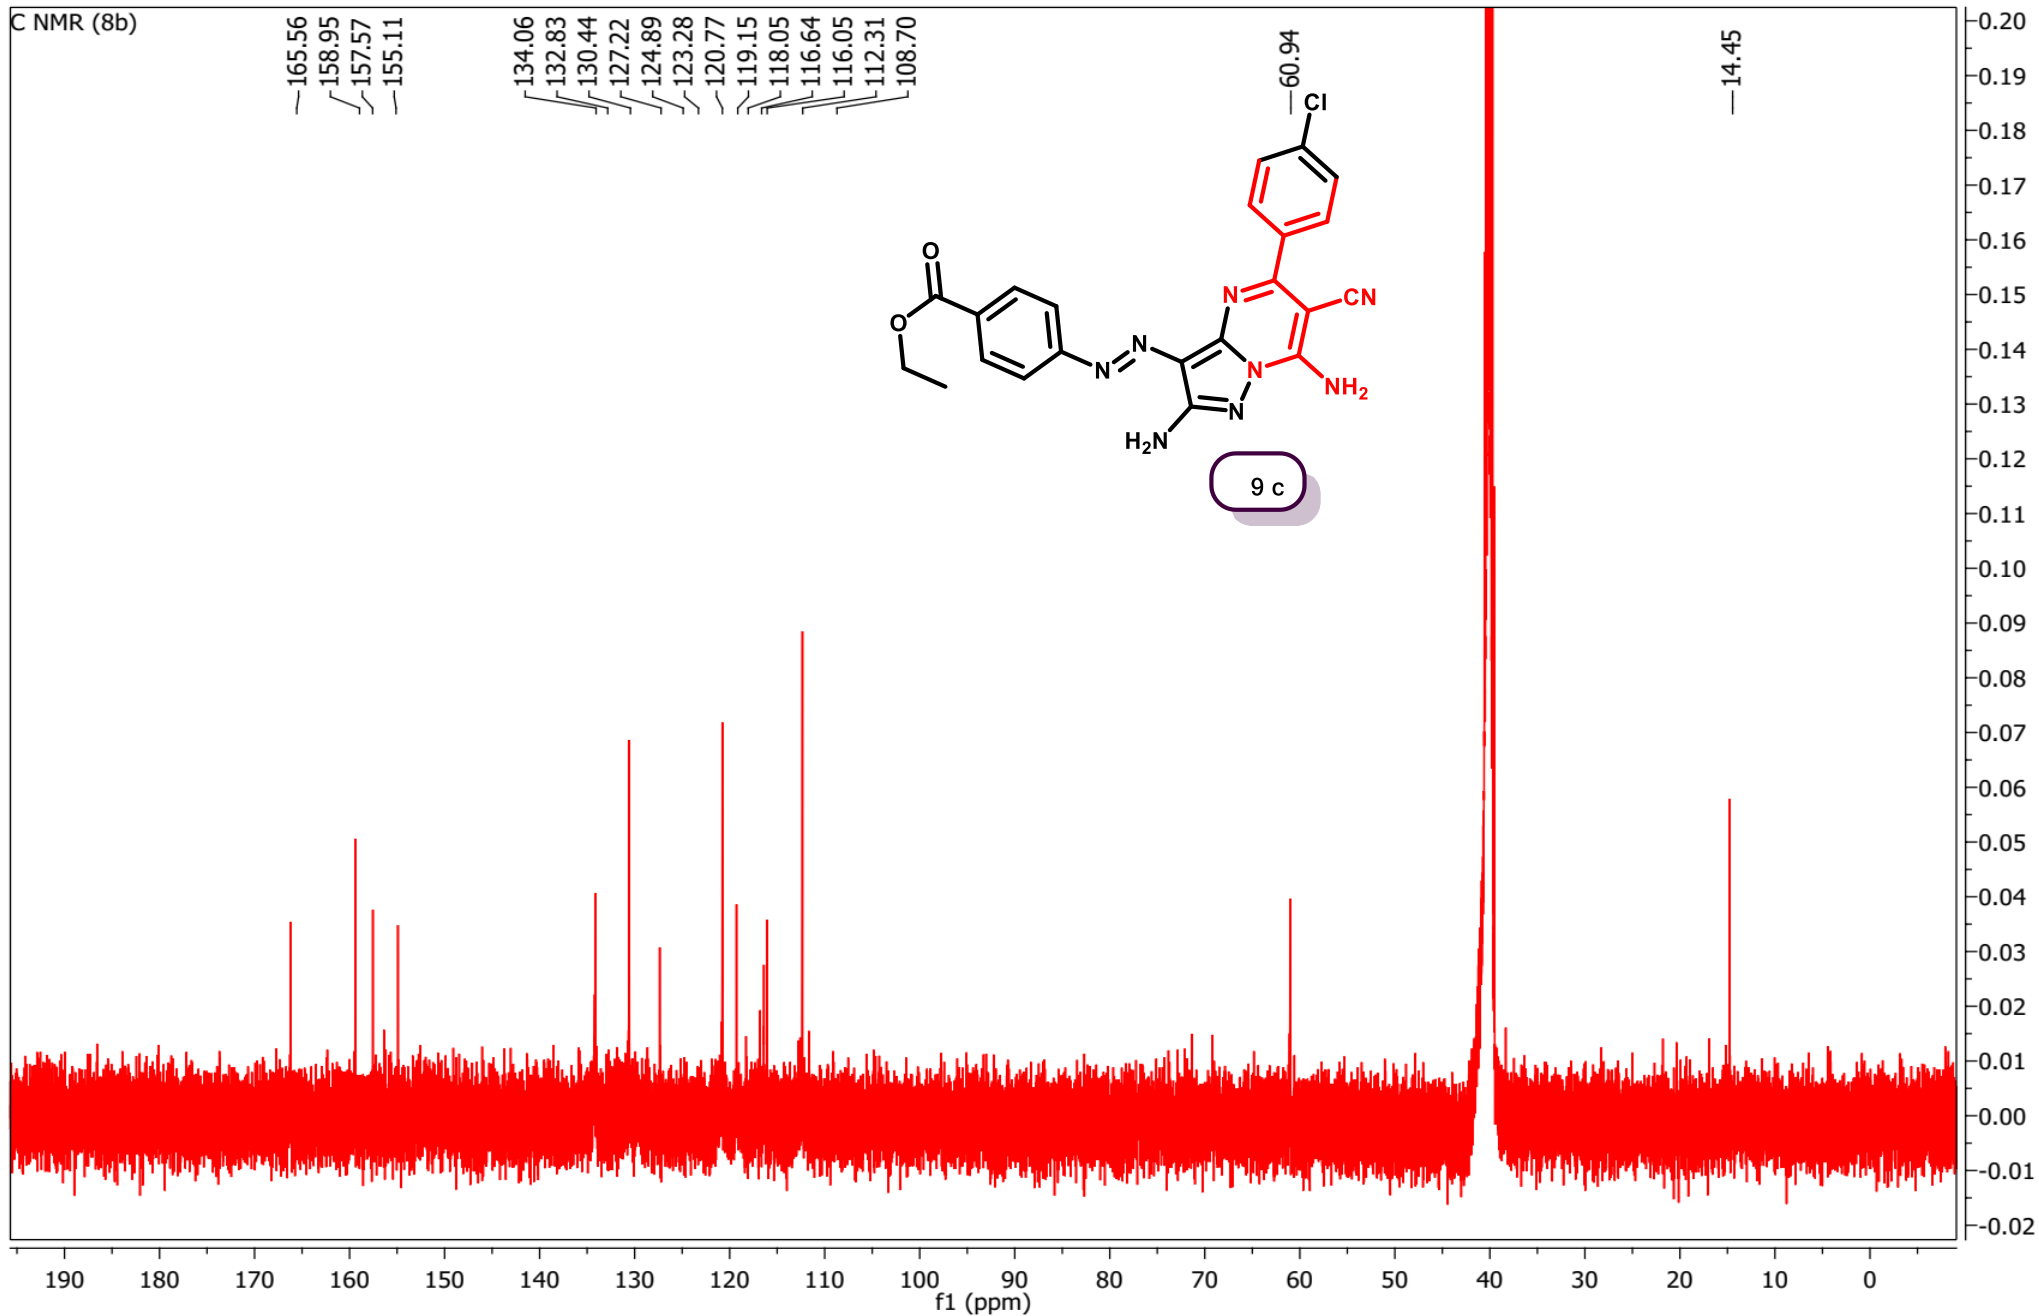

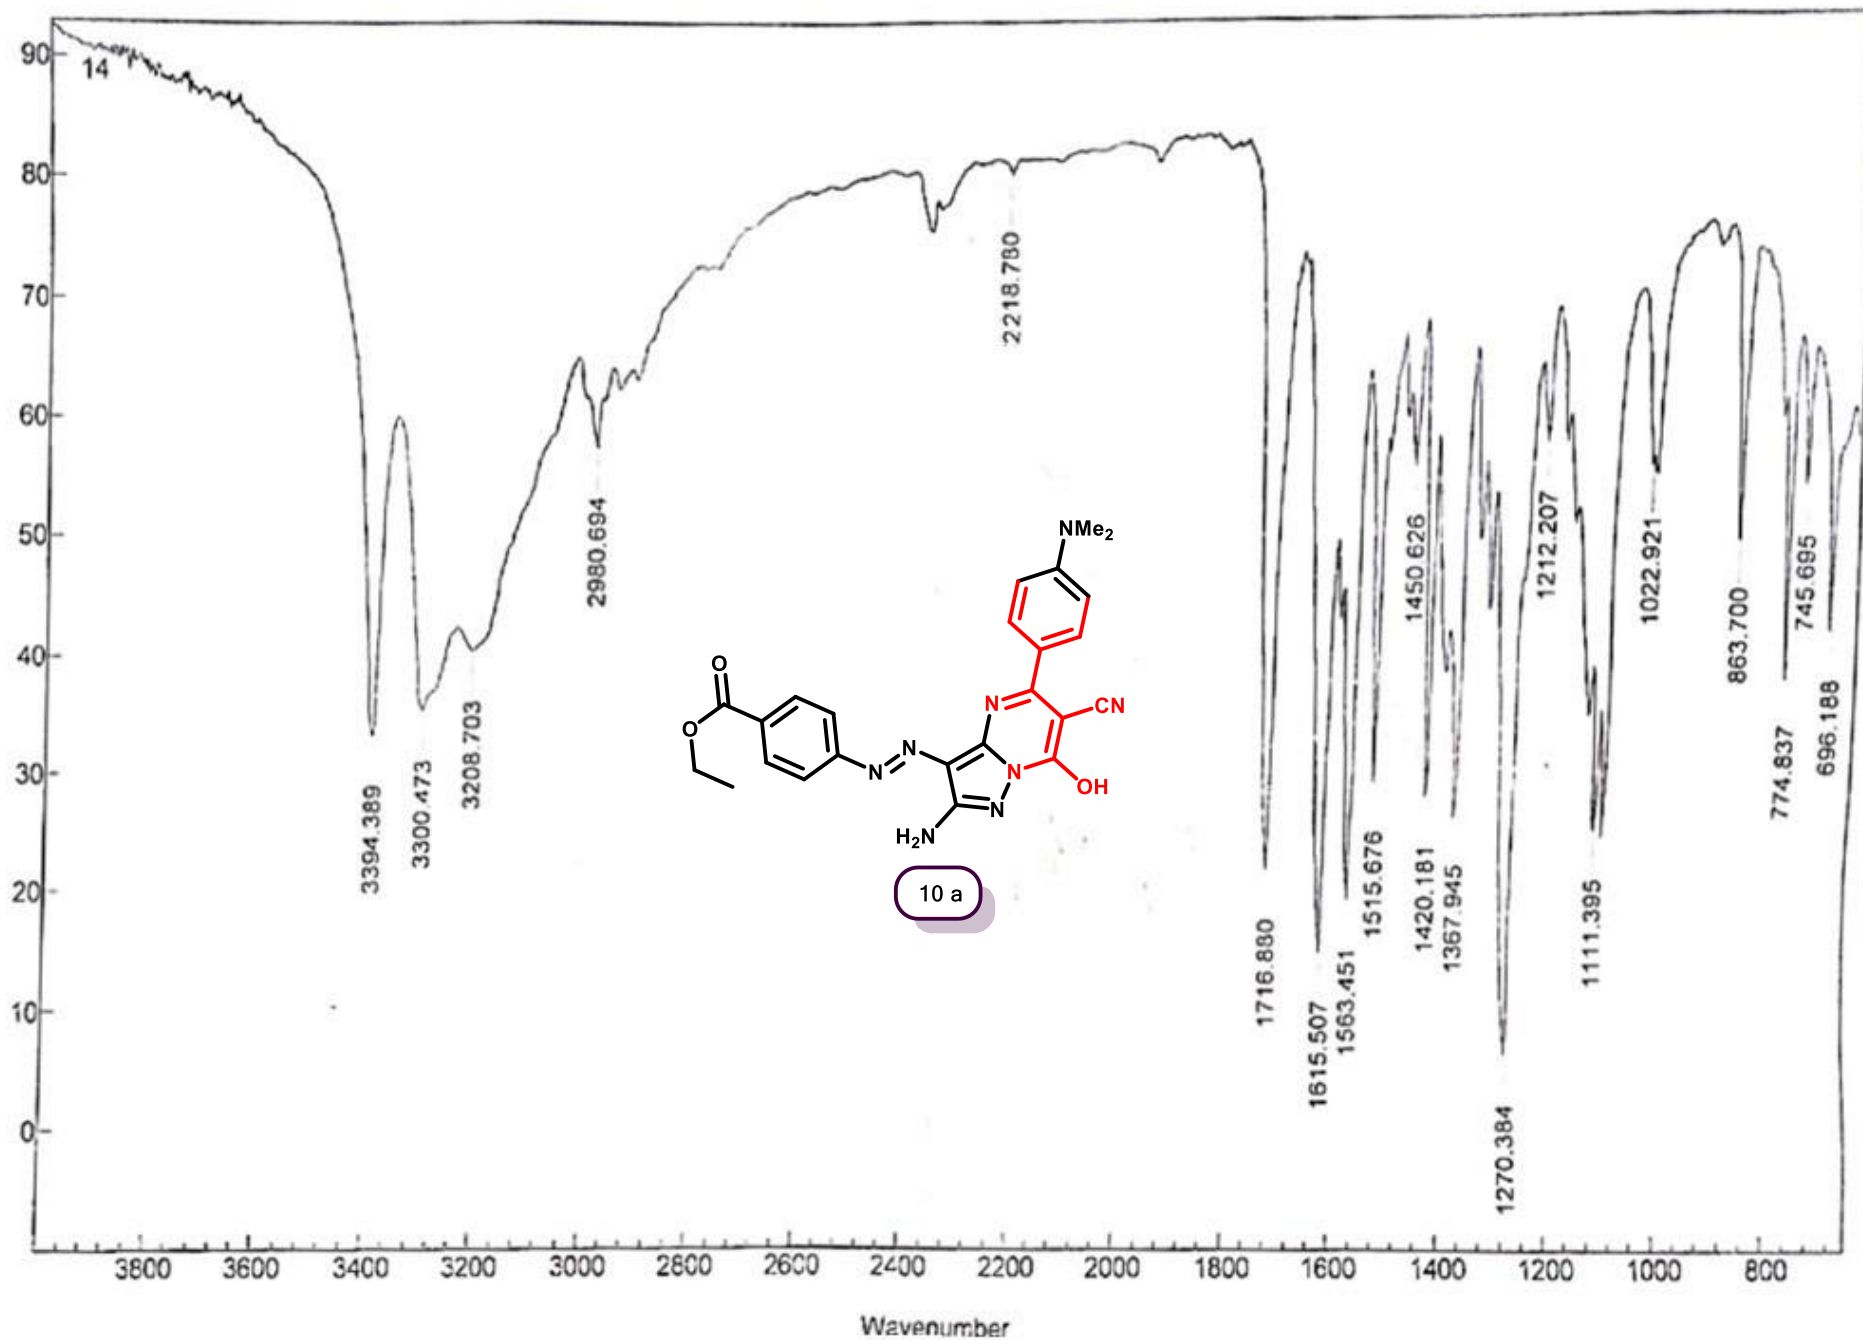

<sup>1</sup>H NMR (9a)

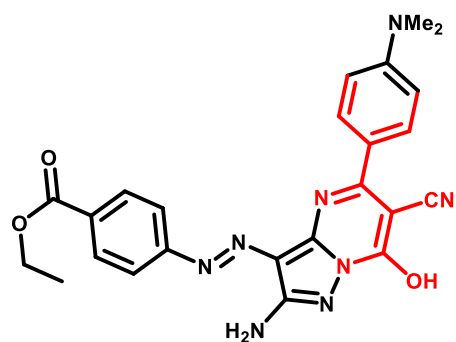

10 a

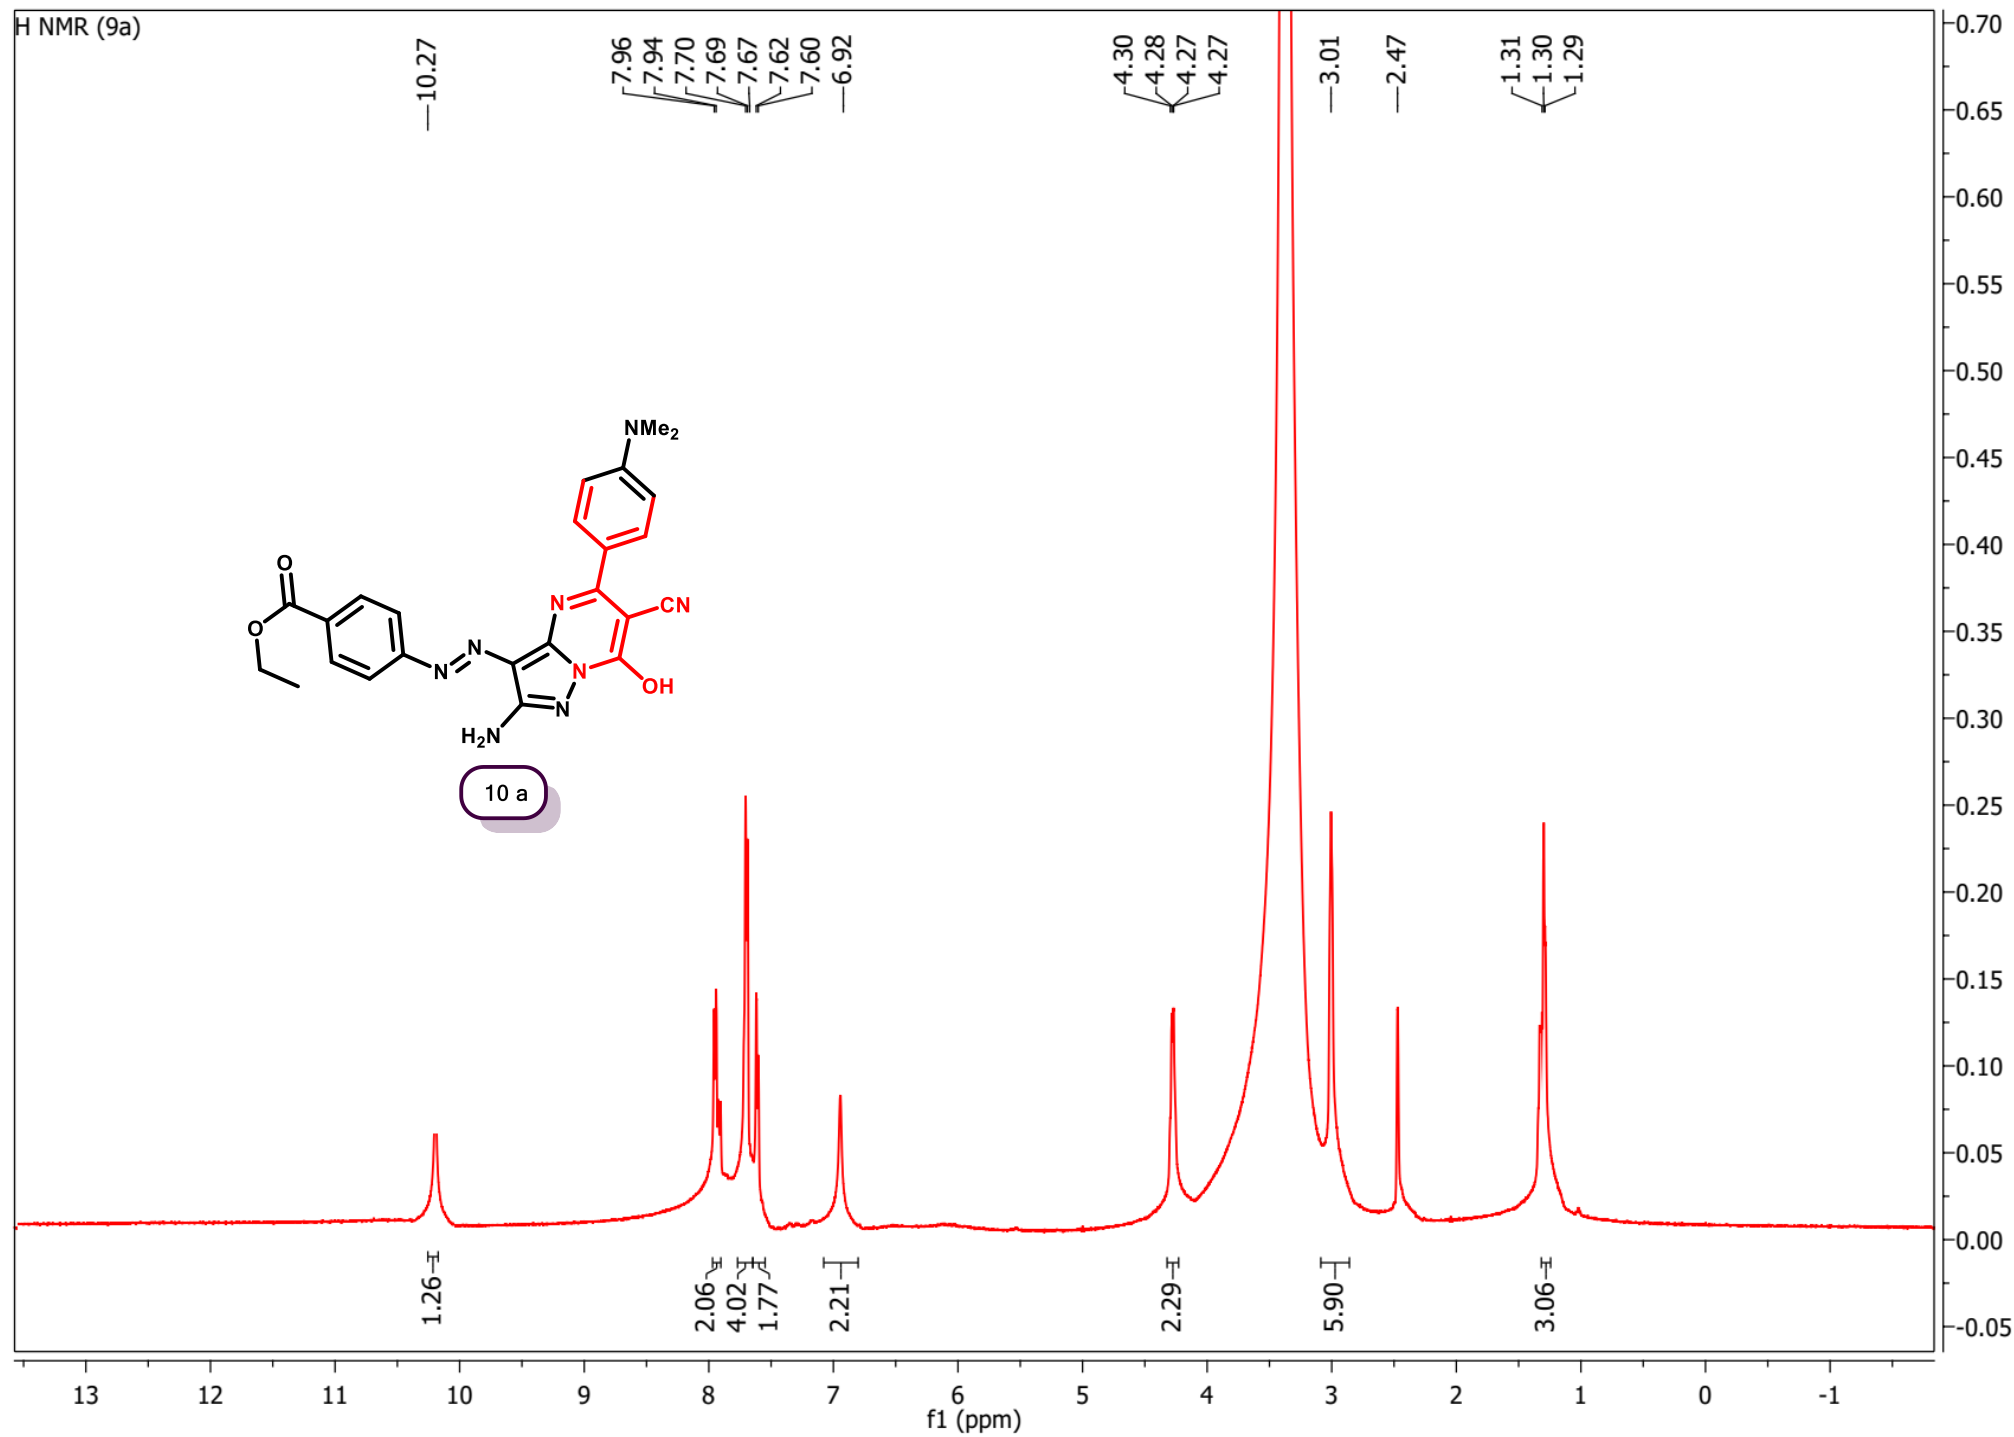

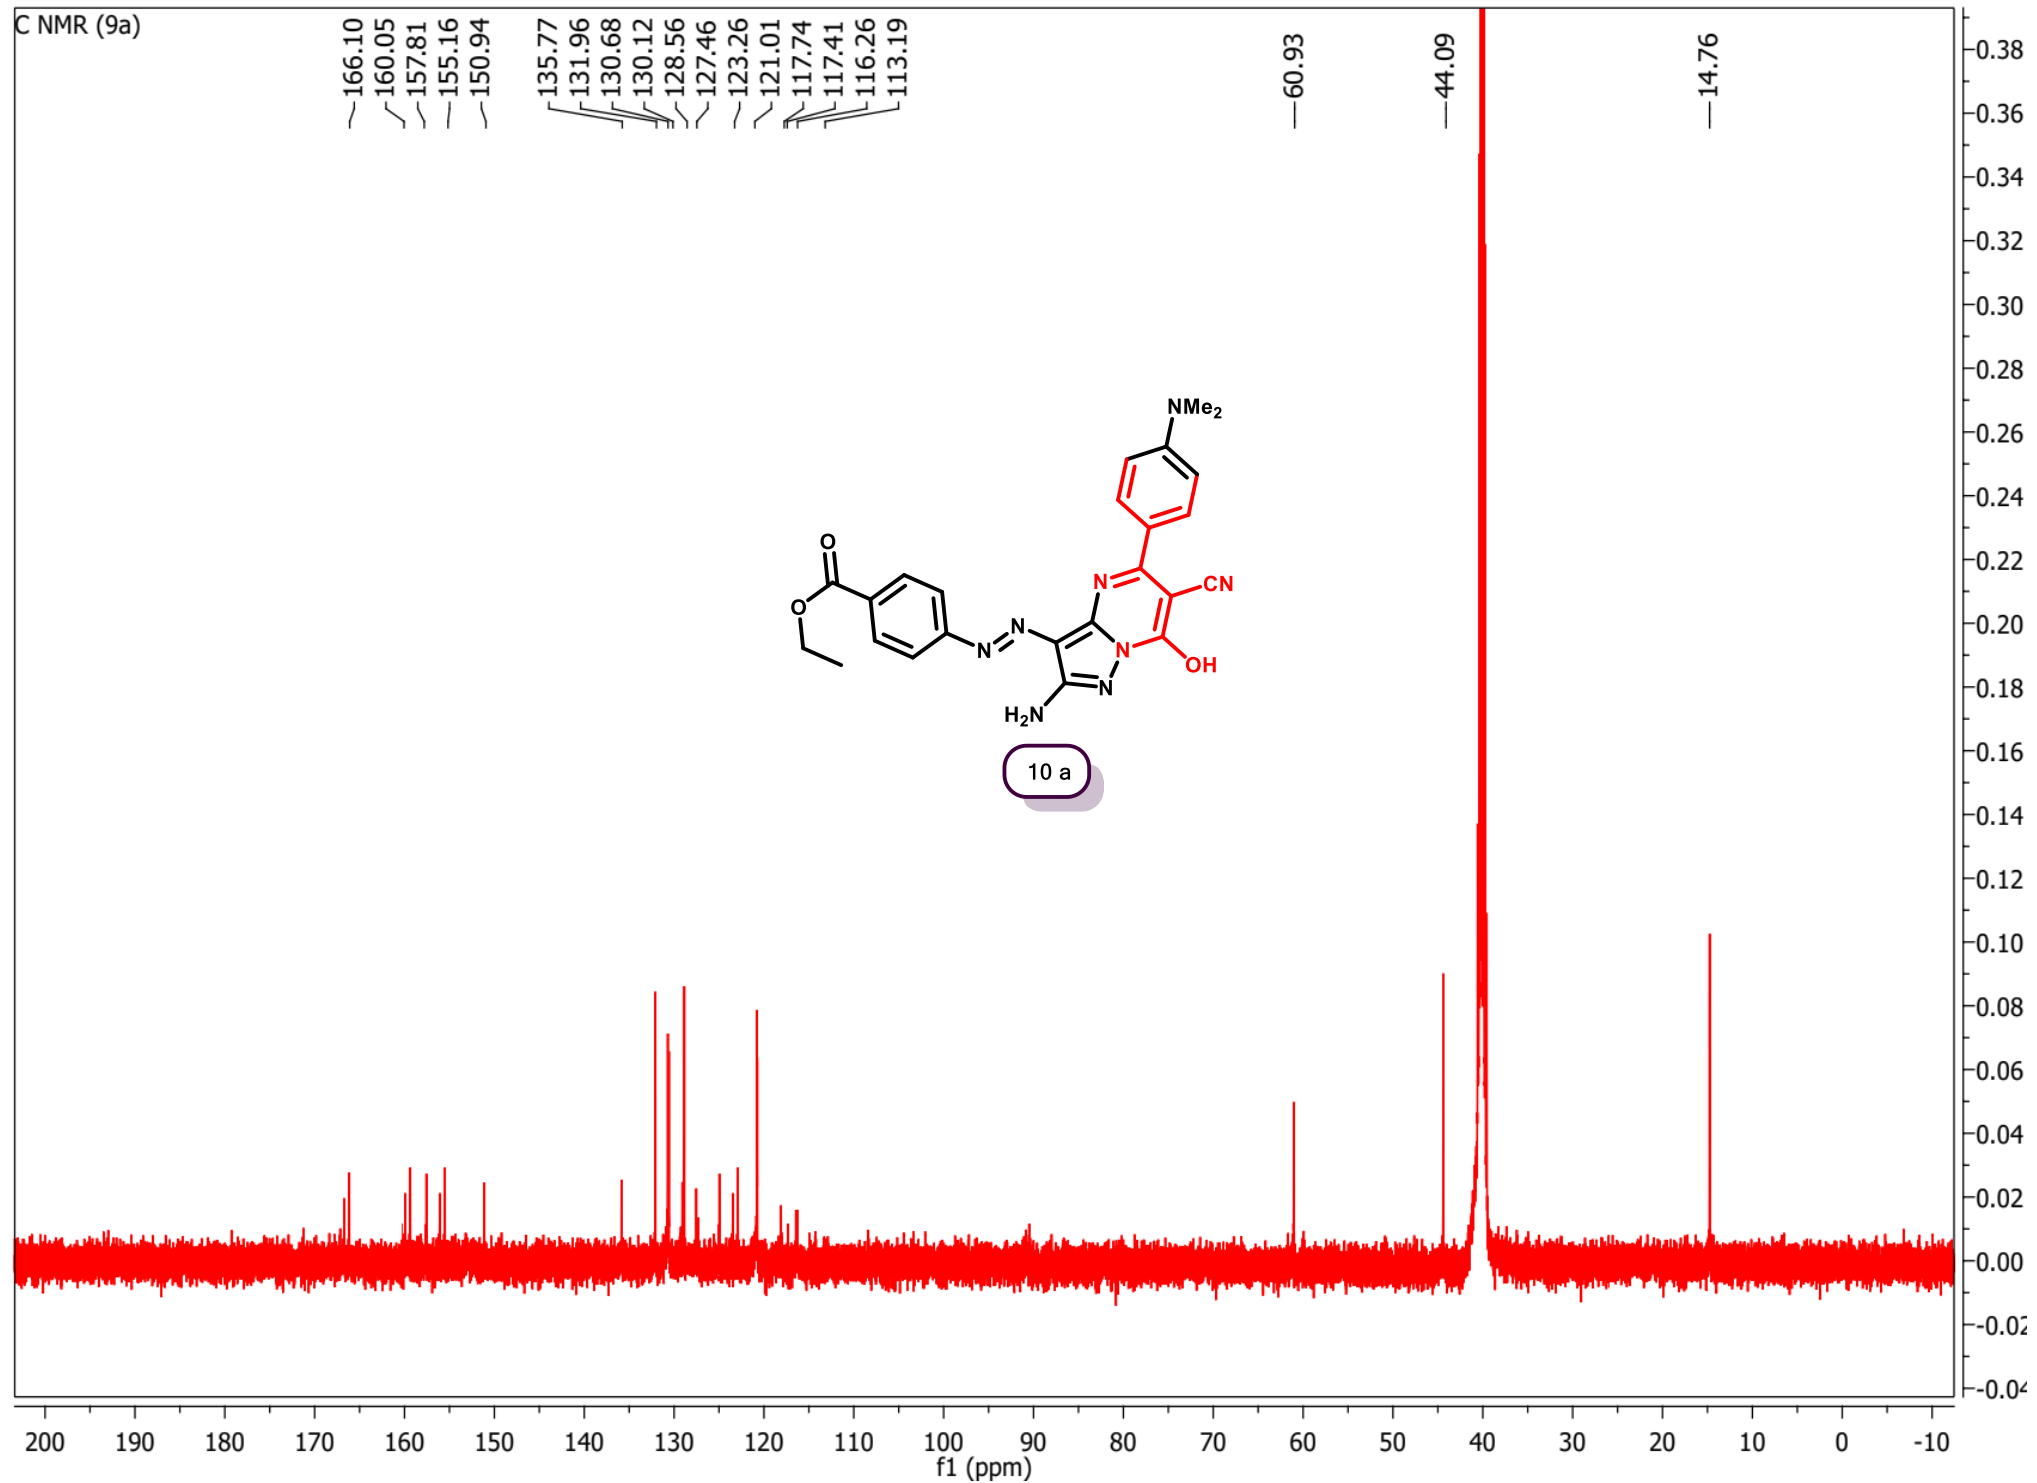

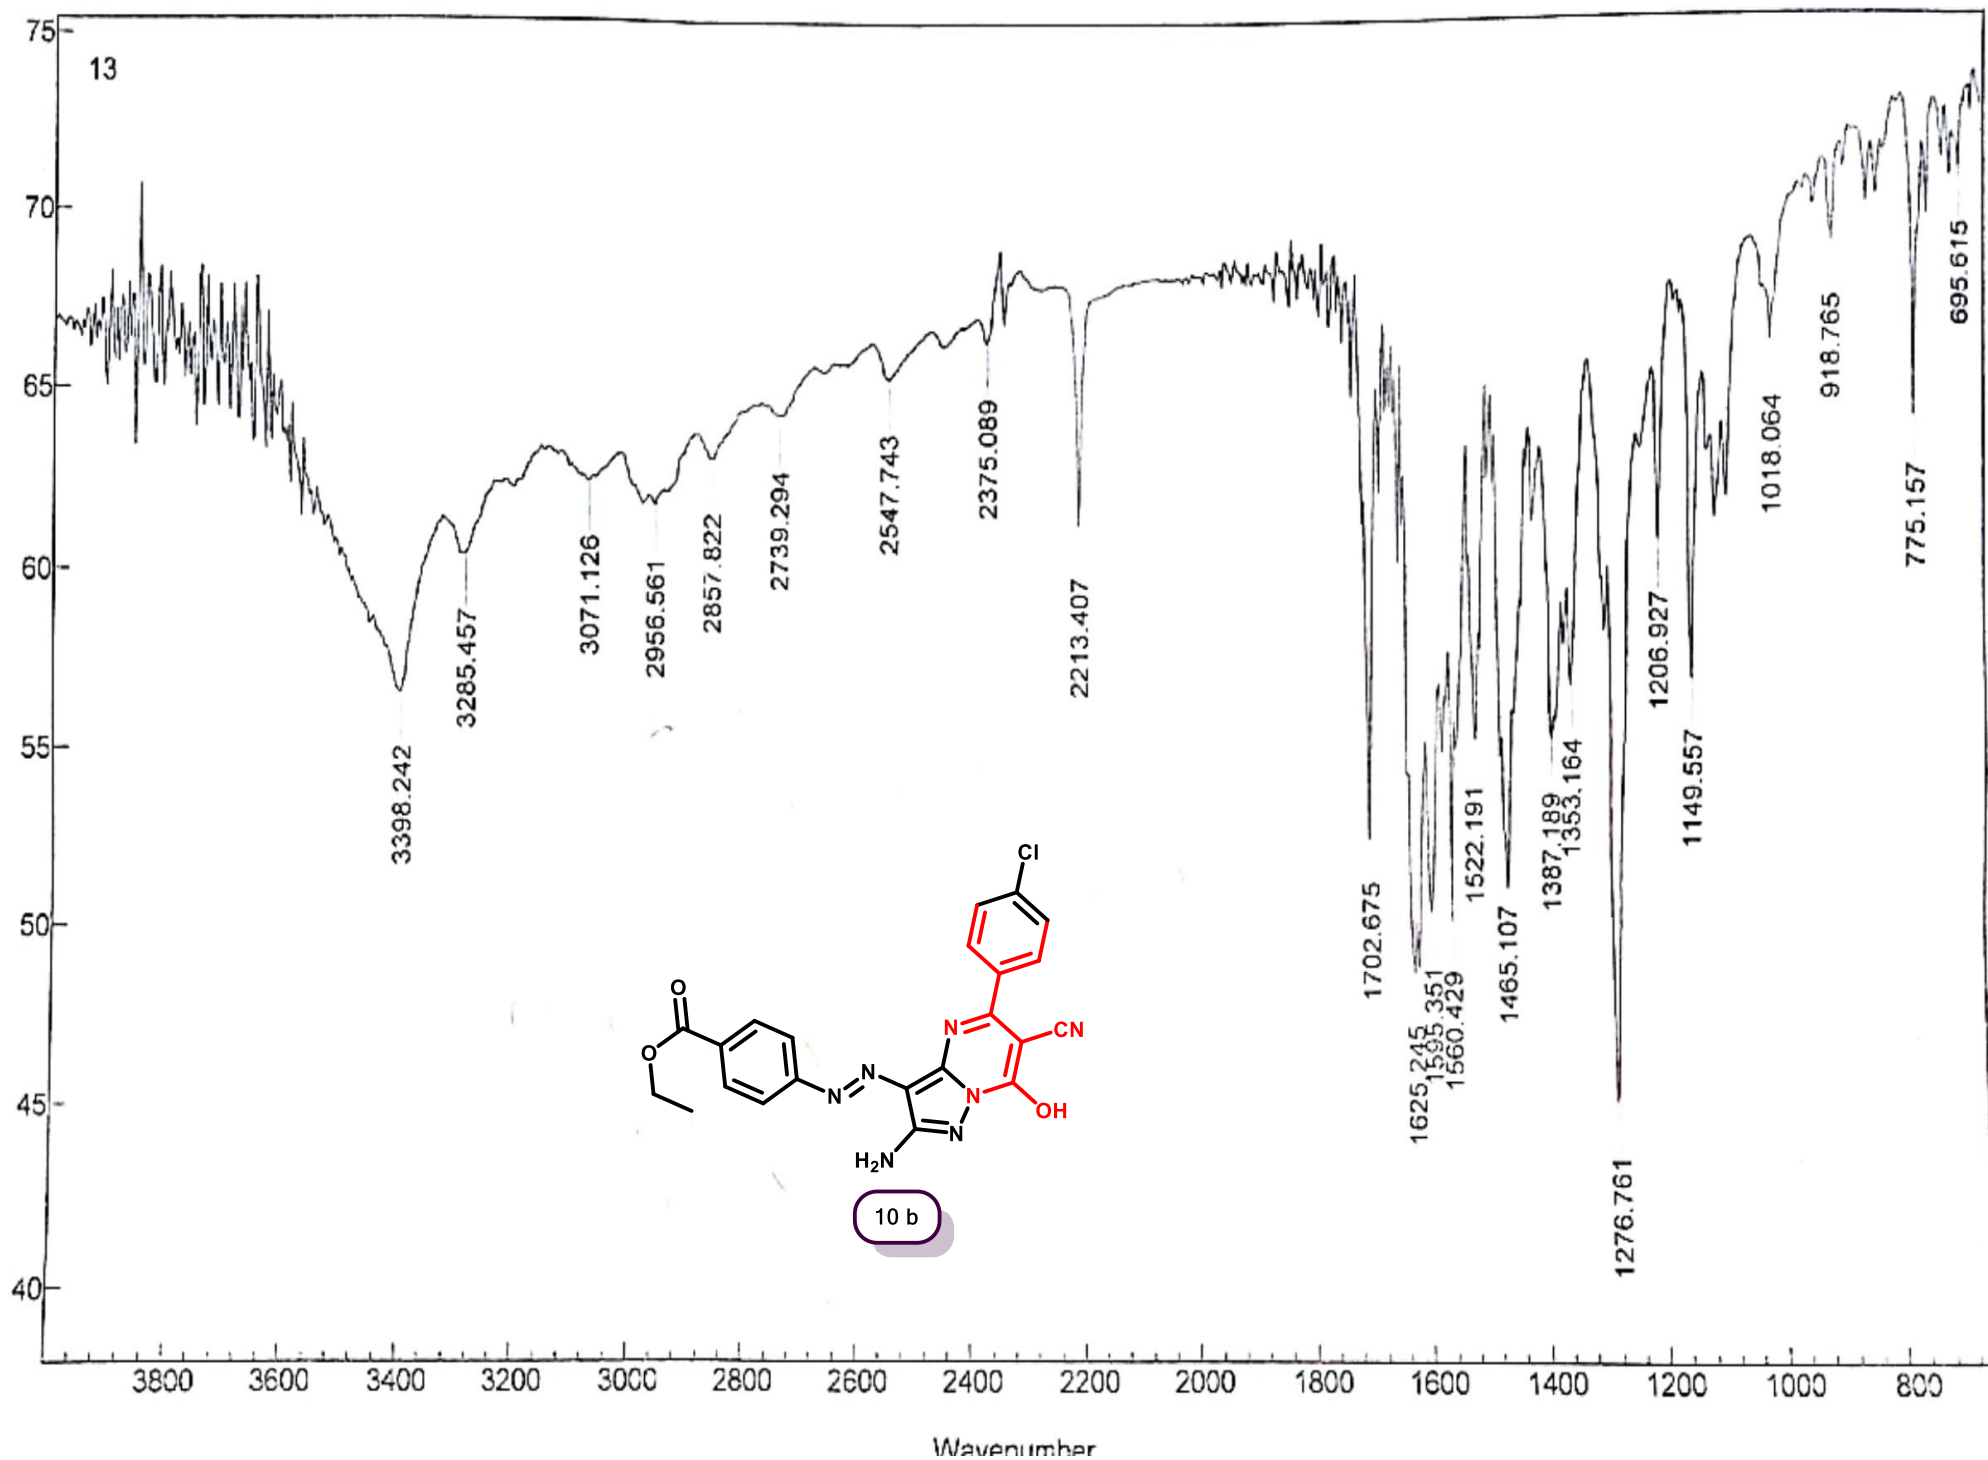

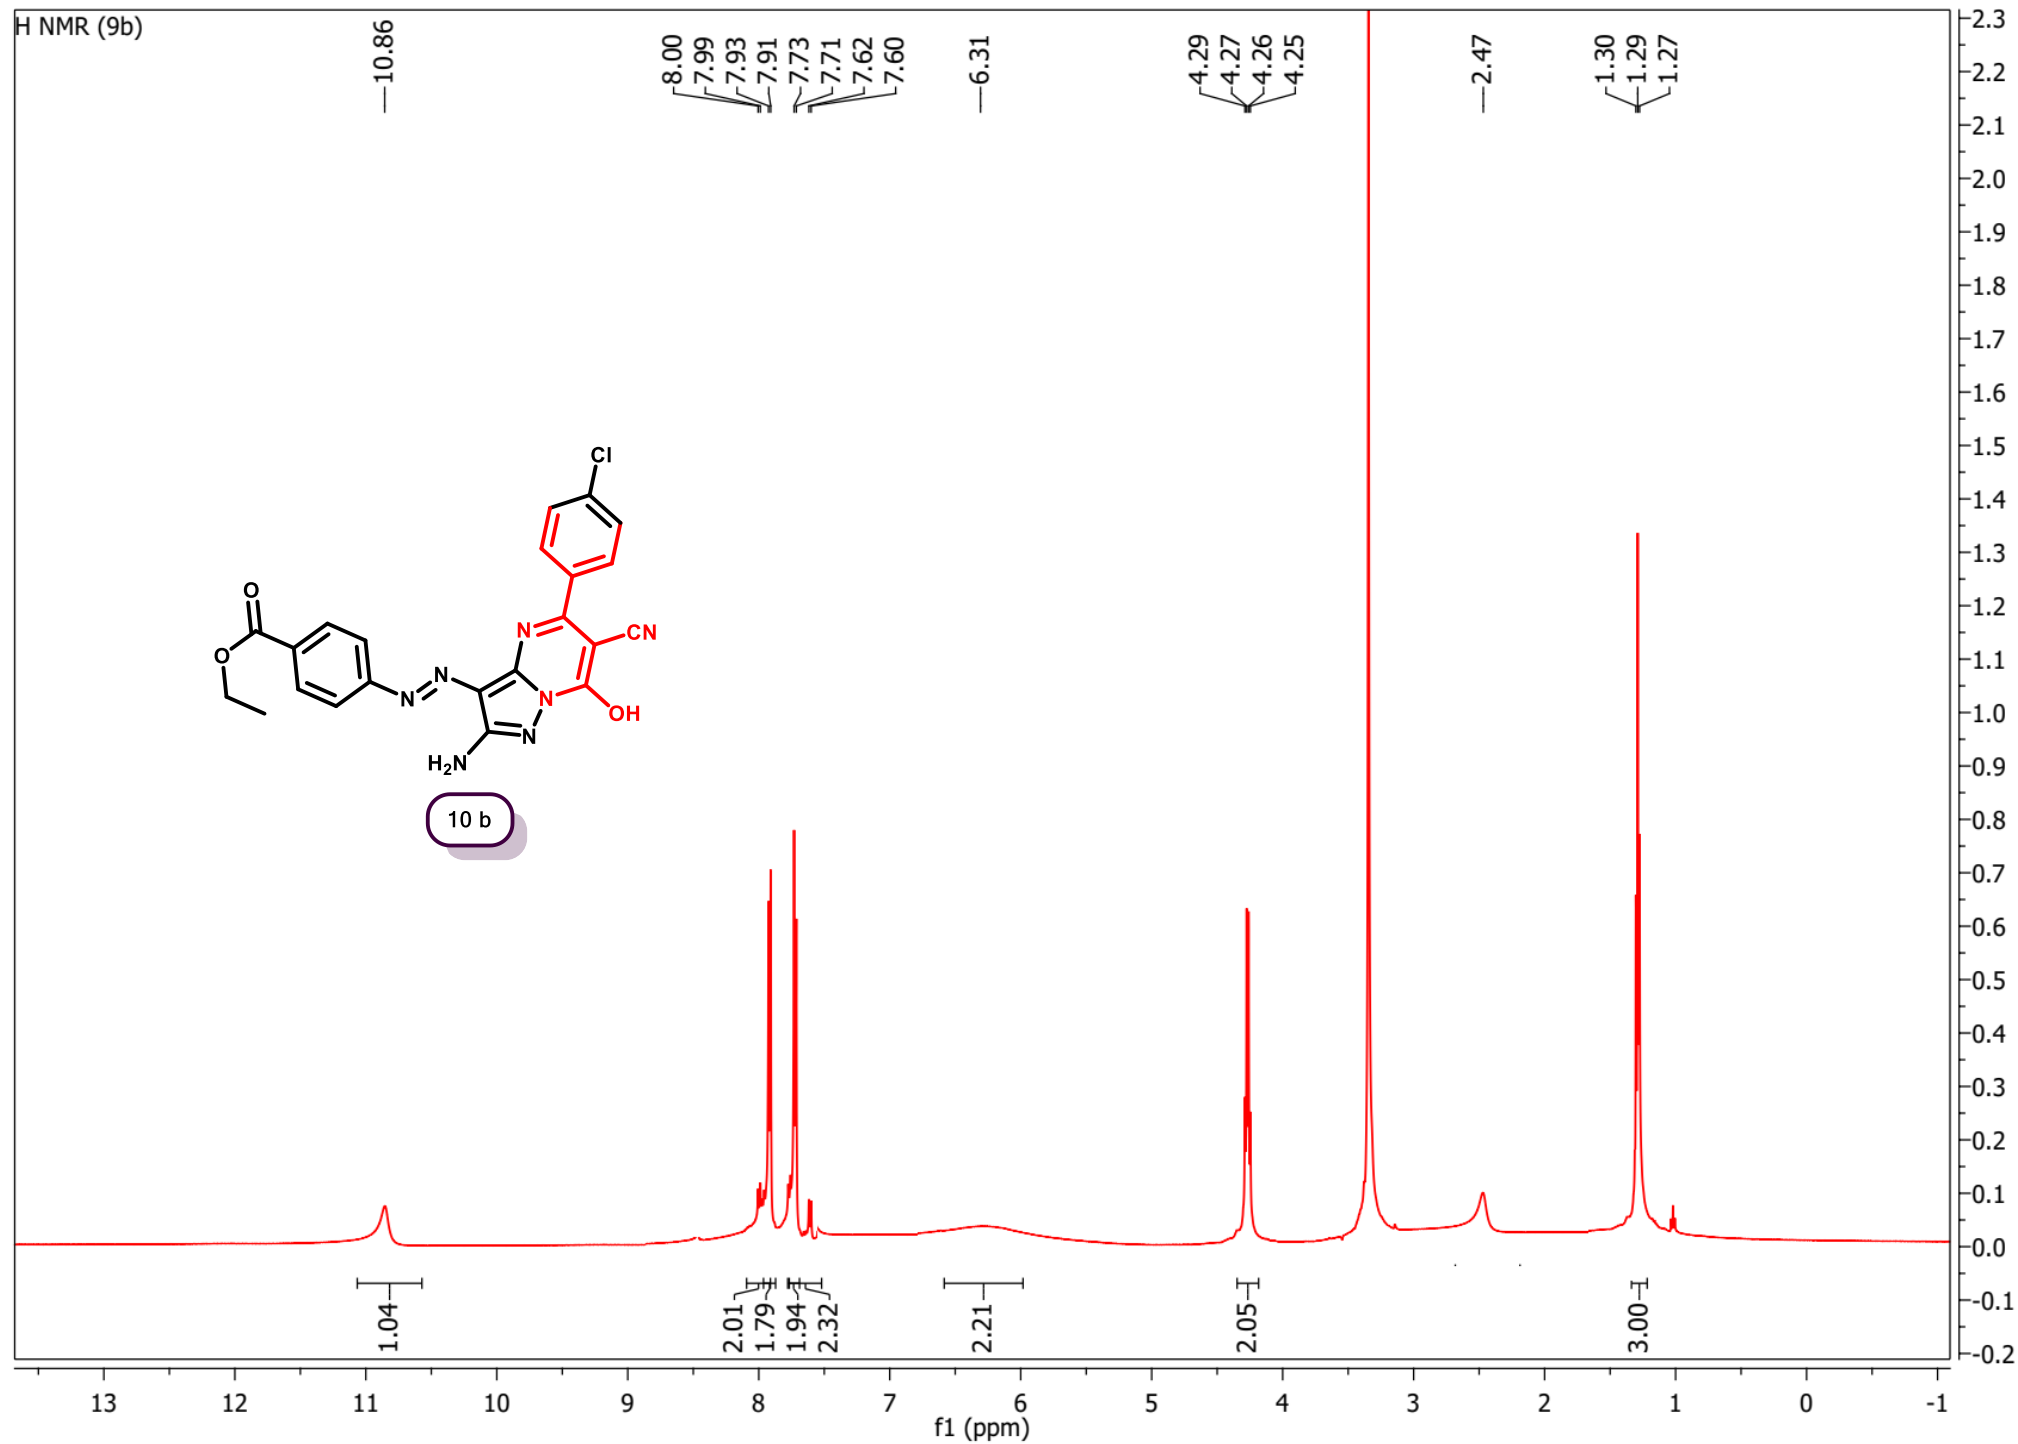

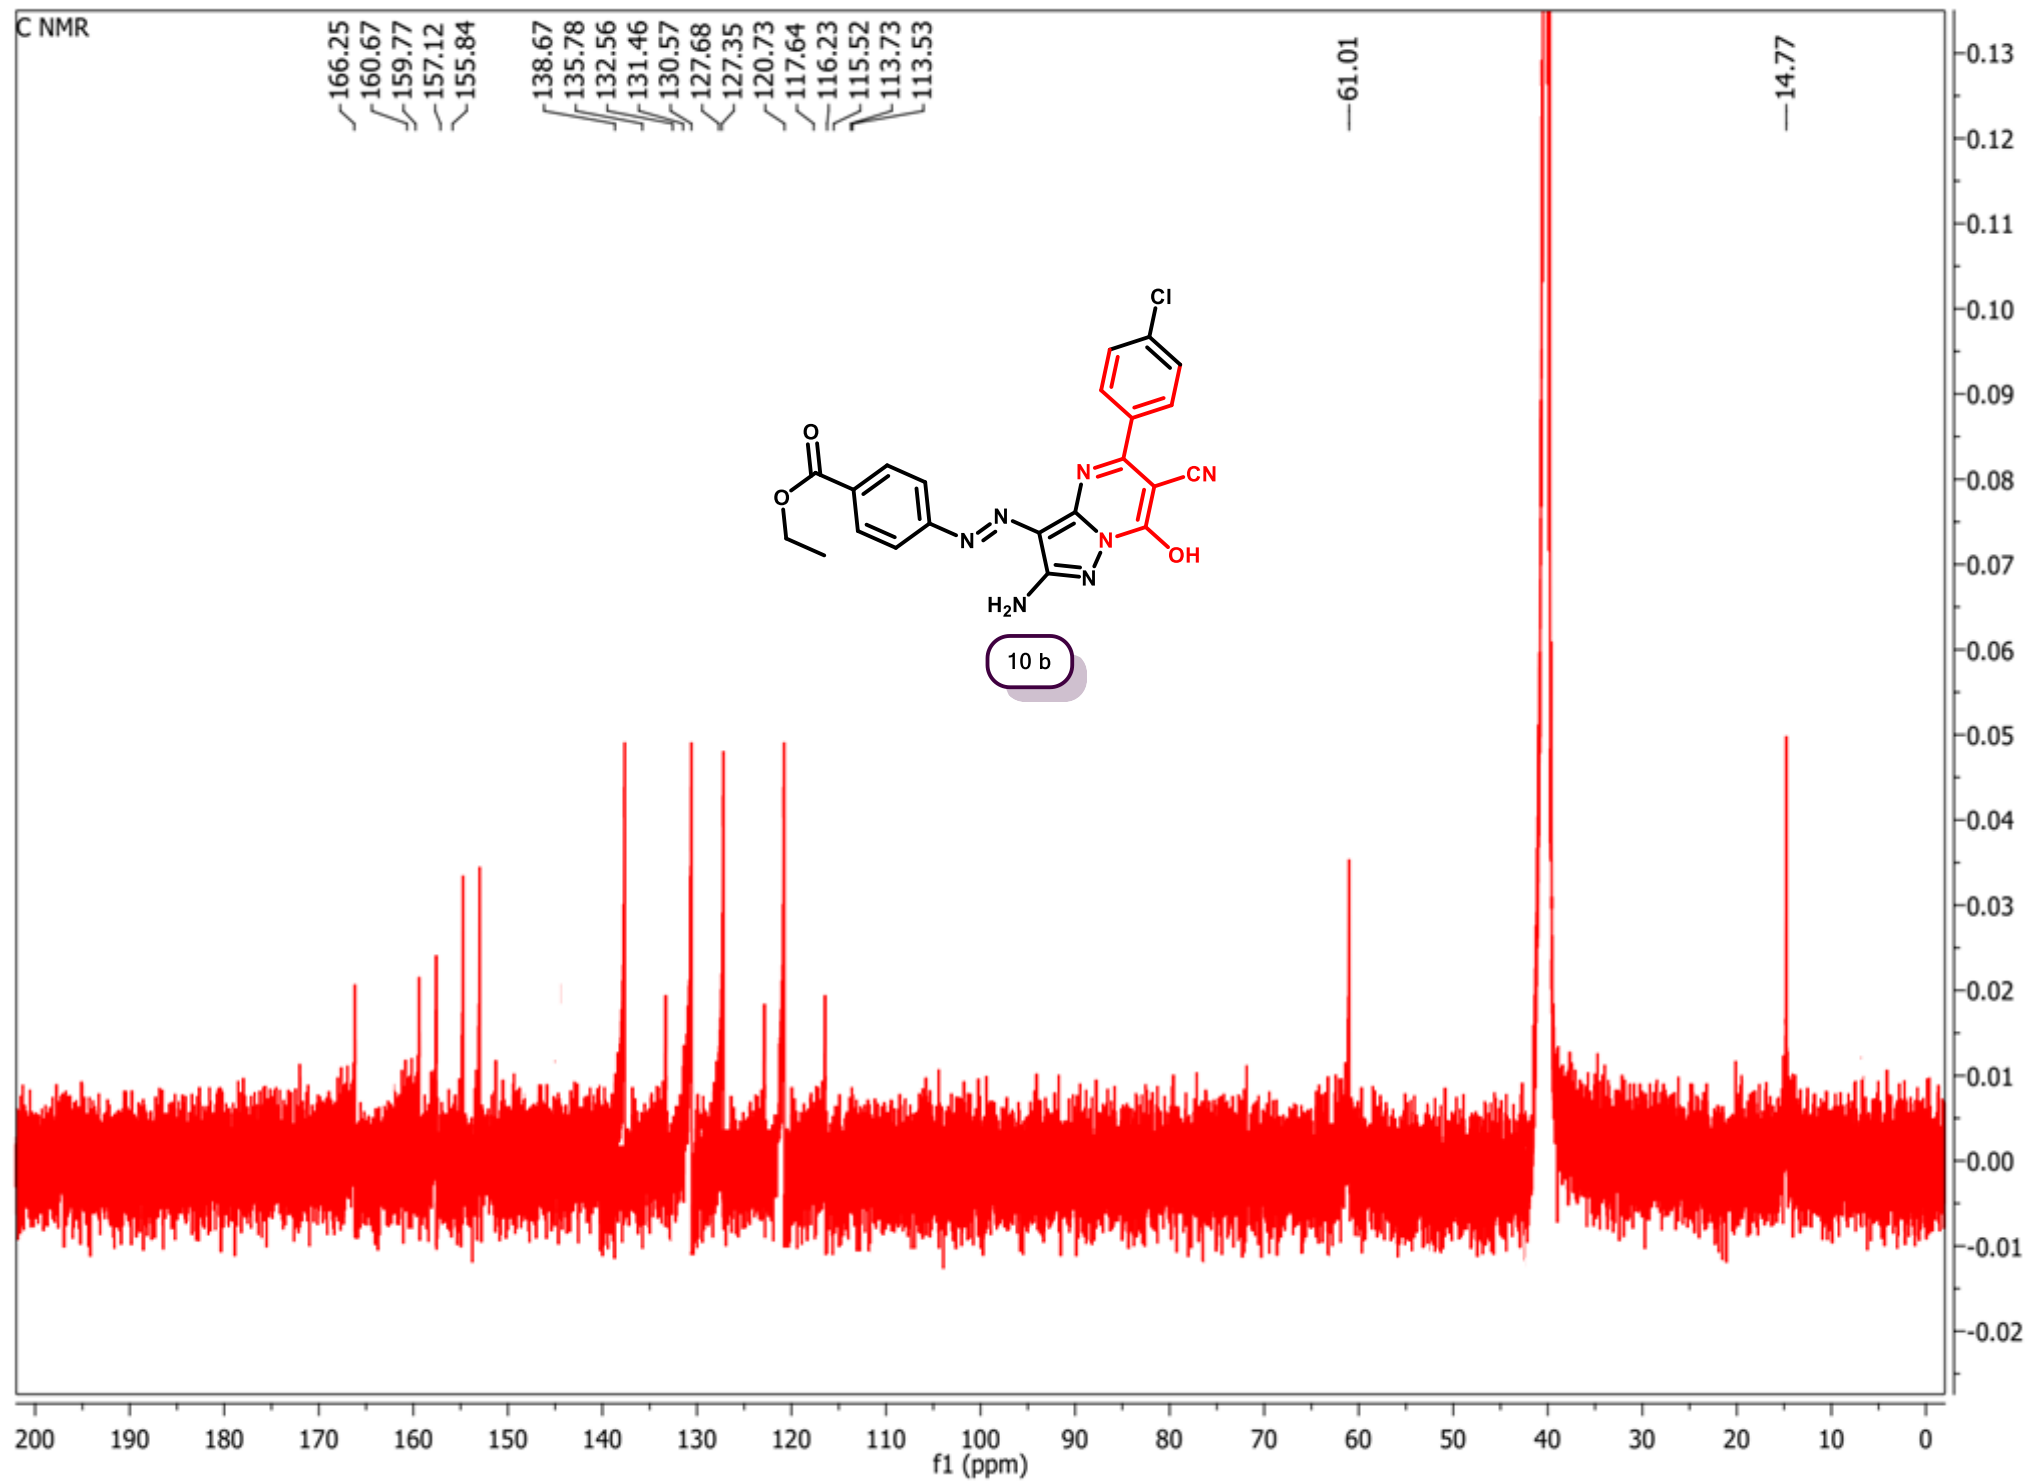

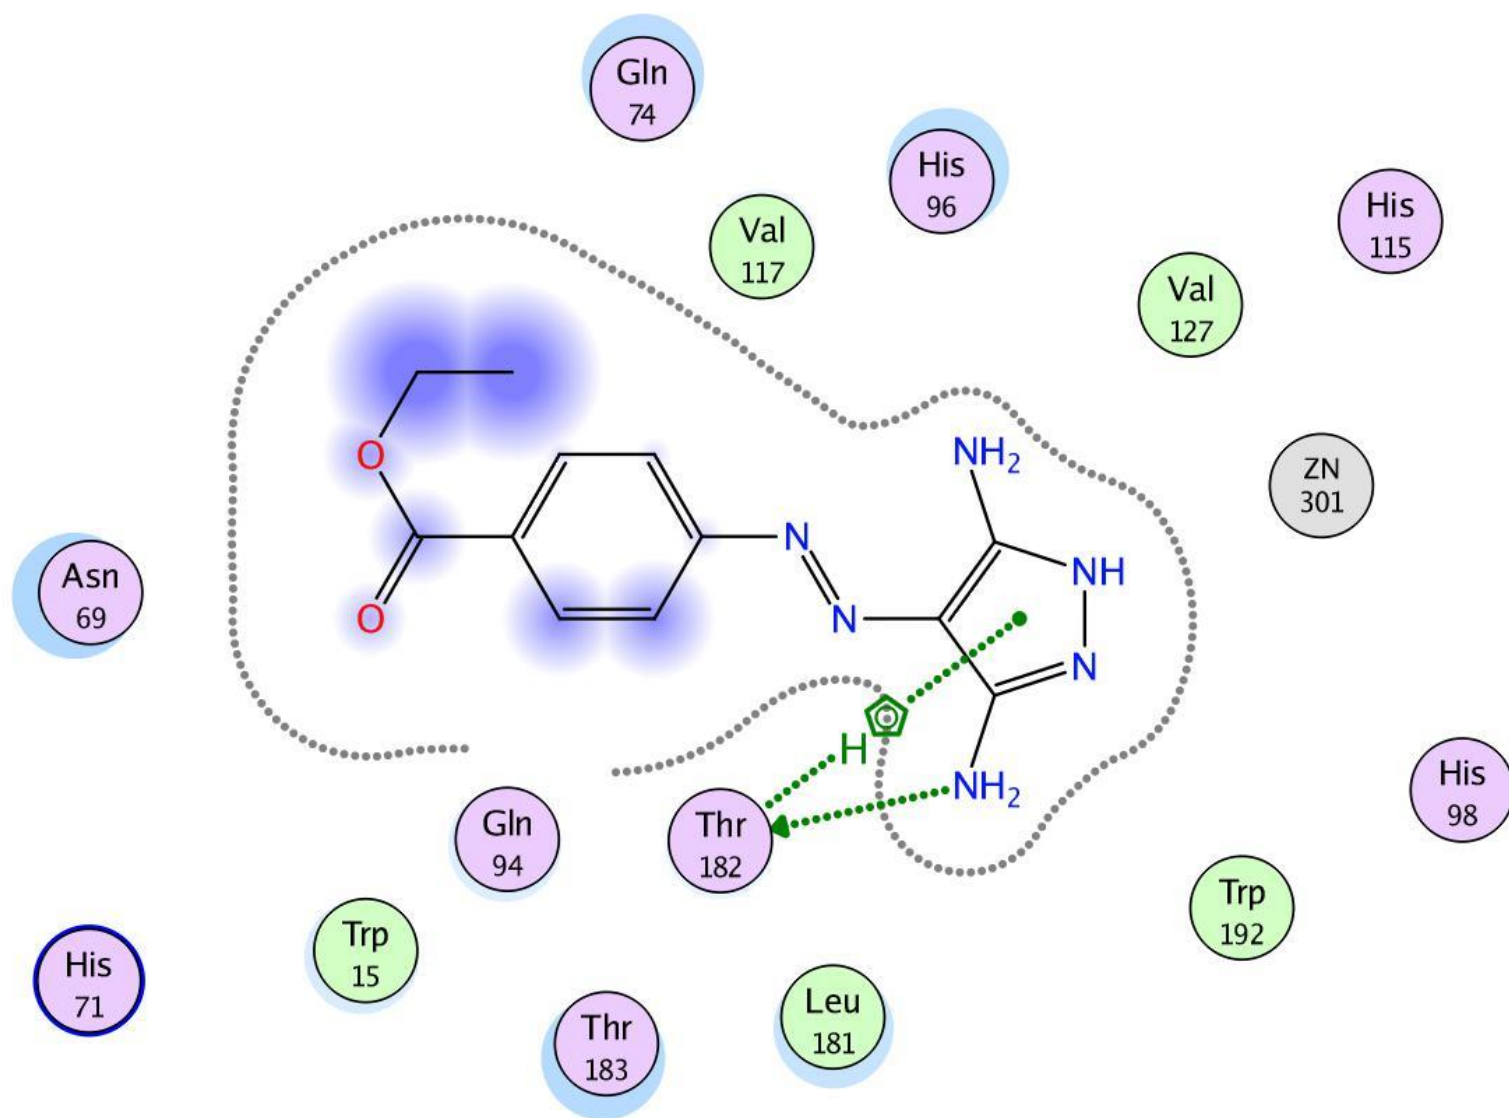

2D enzyme-ligand interaction of compounds **3a** inside the active site of alpha CA (PDB: 5HPJ)

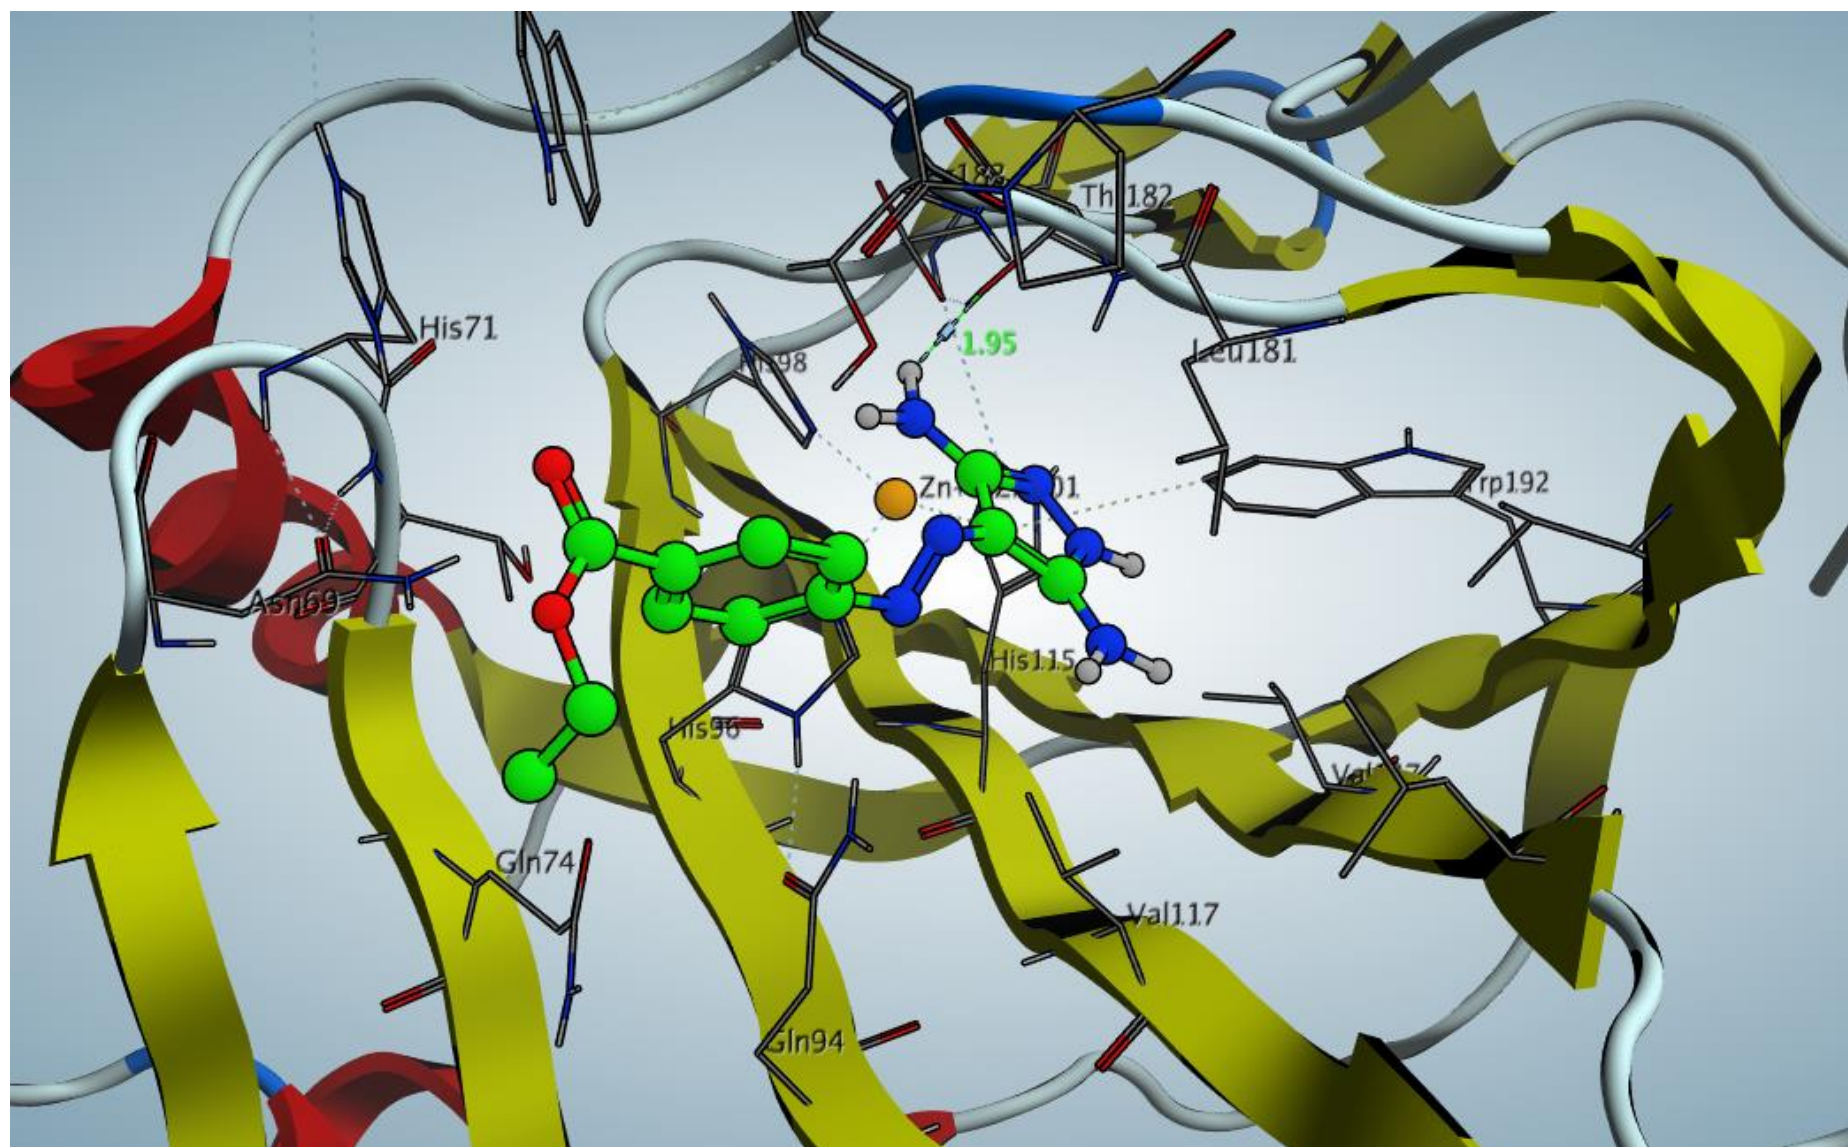

3D enzyme-ligand interaction of compounds **3a** inside the active site of alpha CA (PDB: 5HPJ)

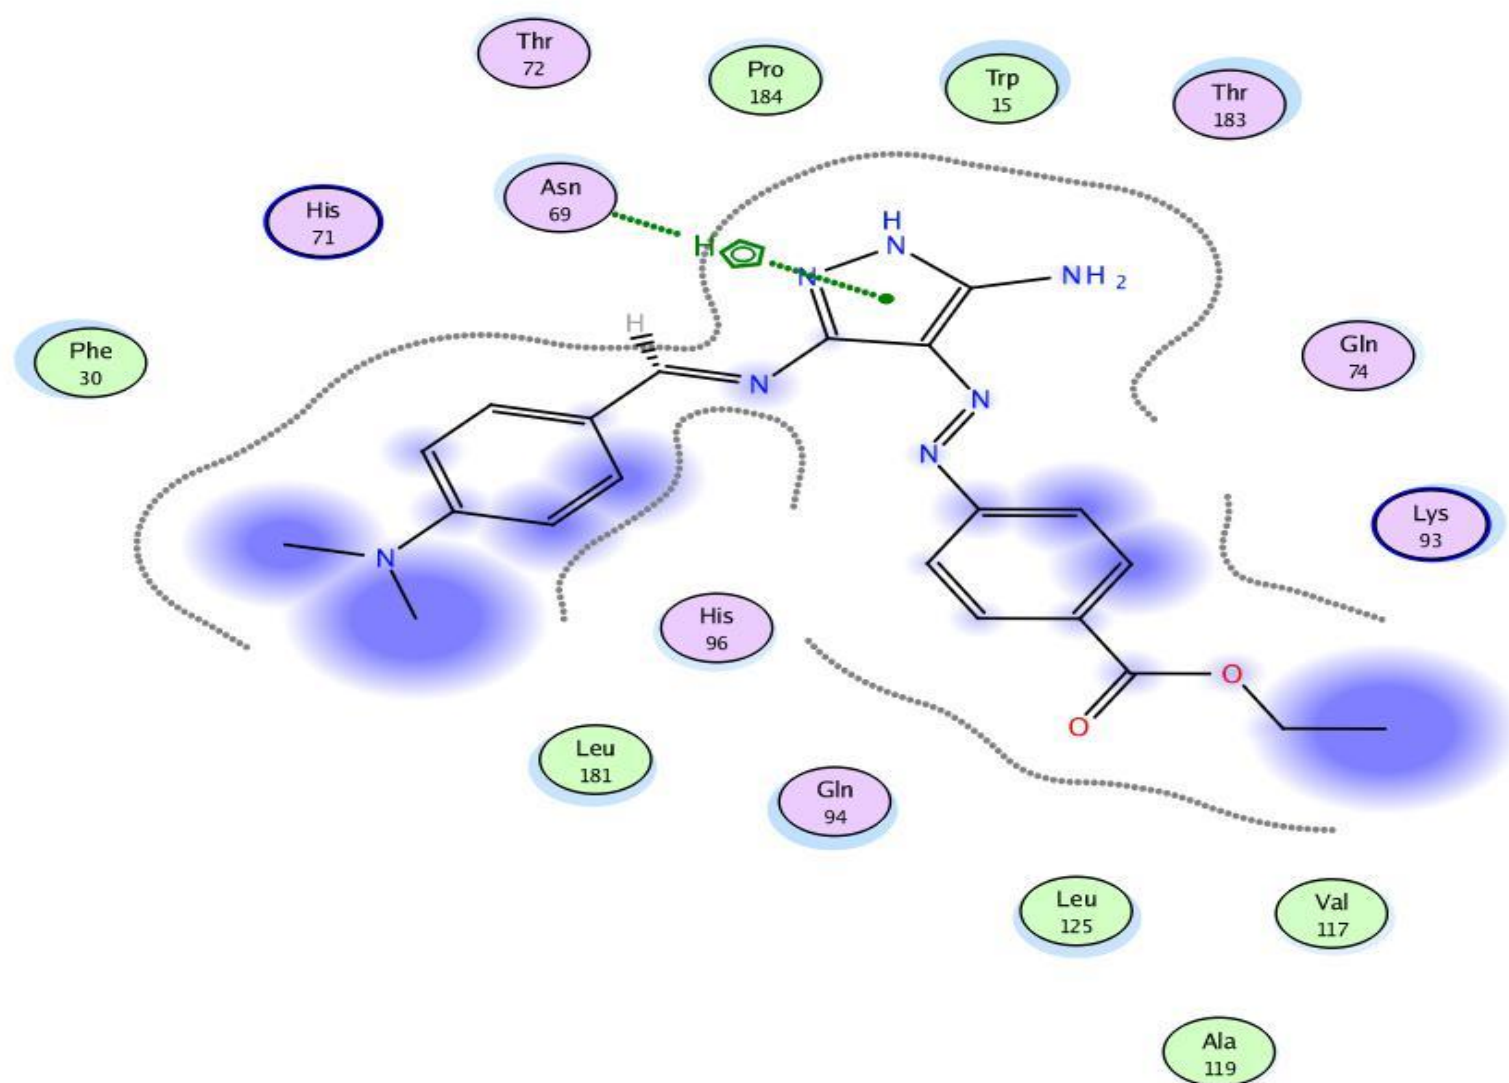

2D enzyme-ligand interaction of compounds **5a** inside the active site of alpha CA (PDB: 5HPJ)

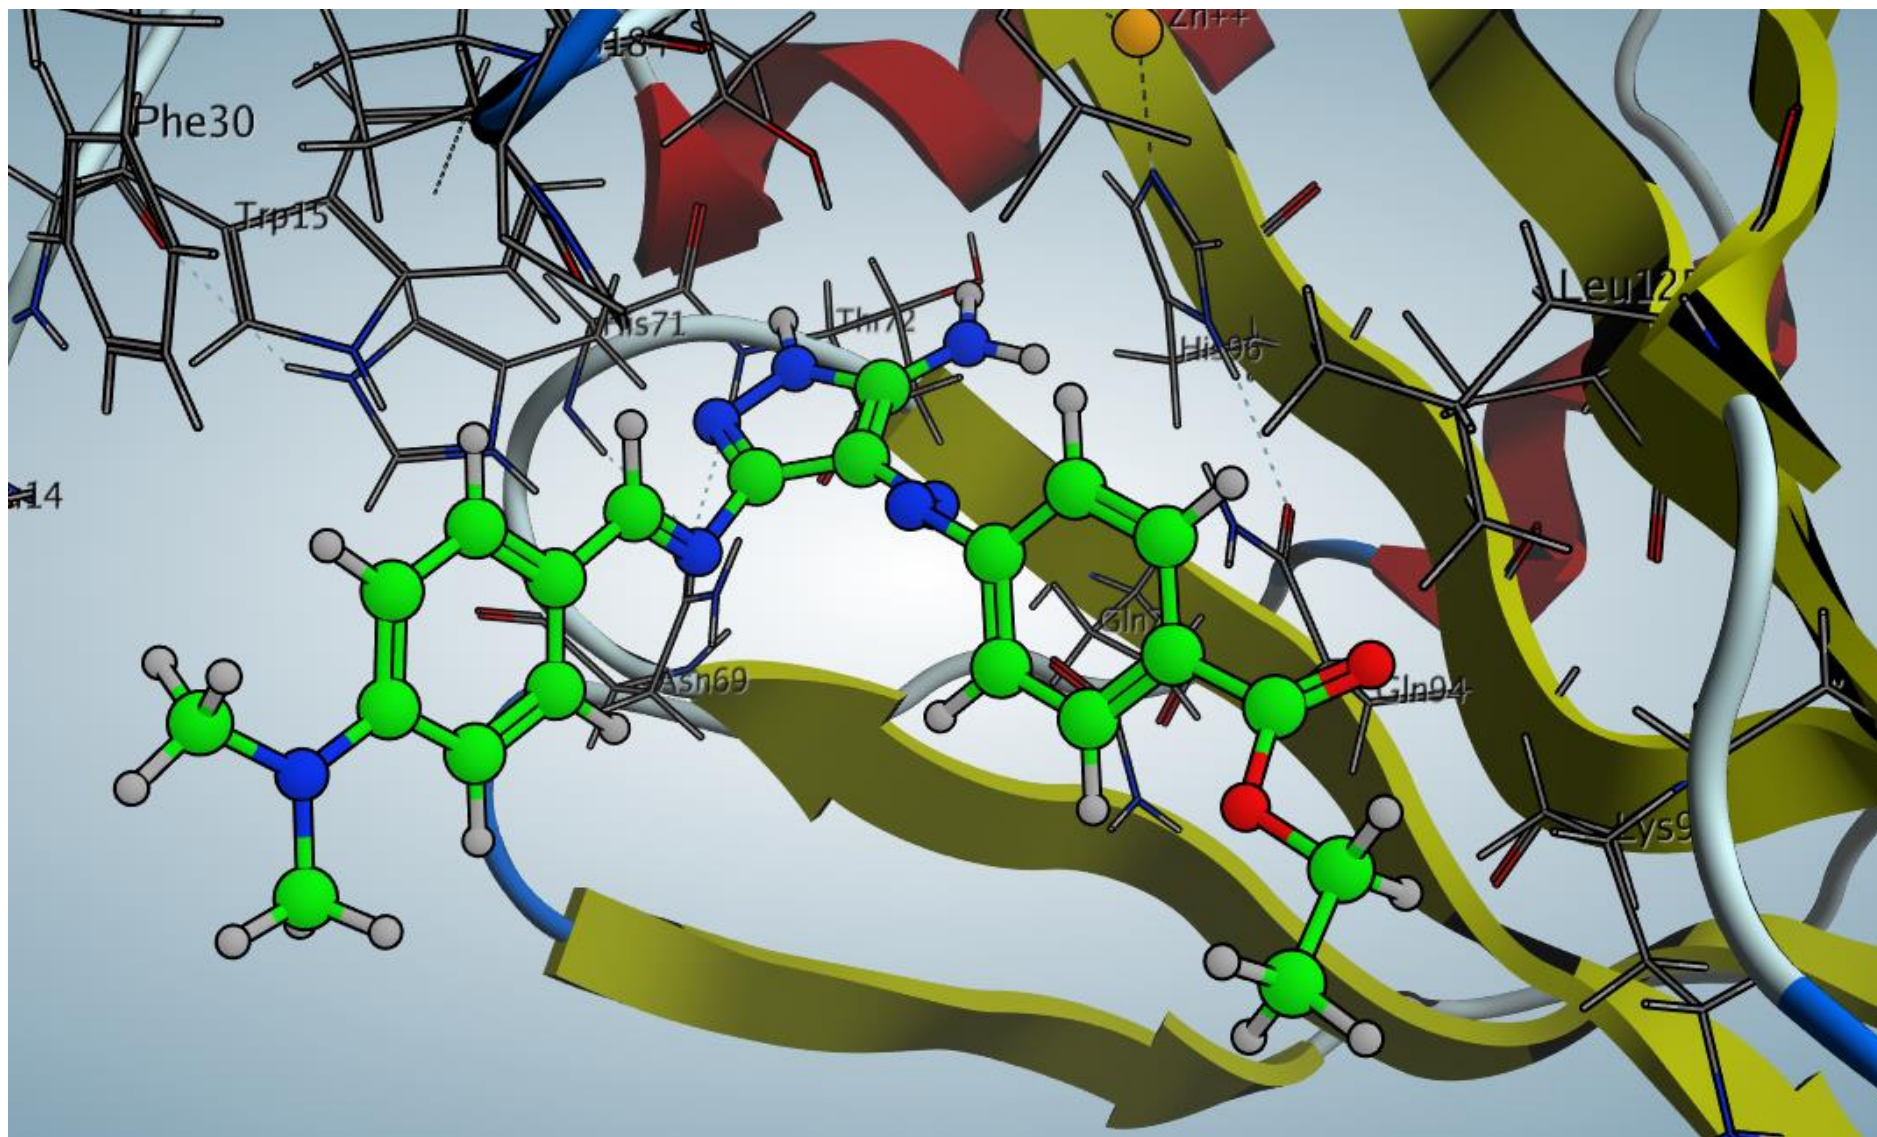

3D enzyme-ligand interaction of compounds **5a** inside the active site of alpha CA (PDB: 5HPJ)

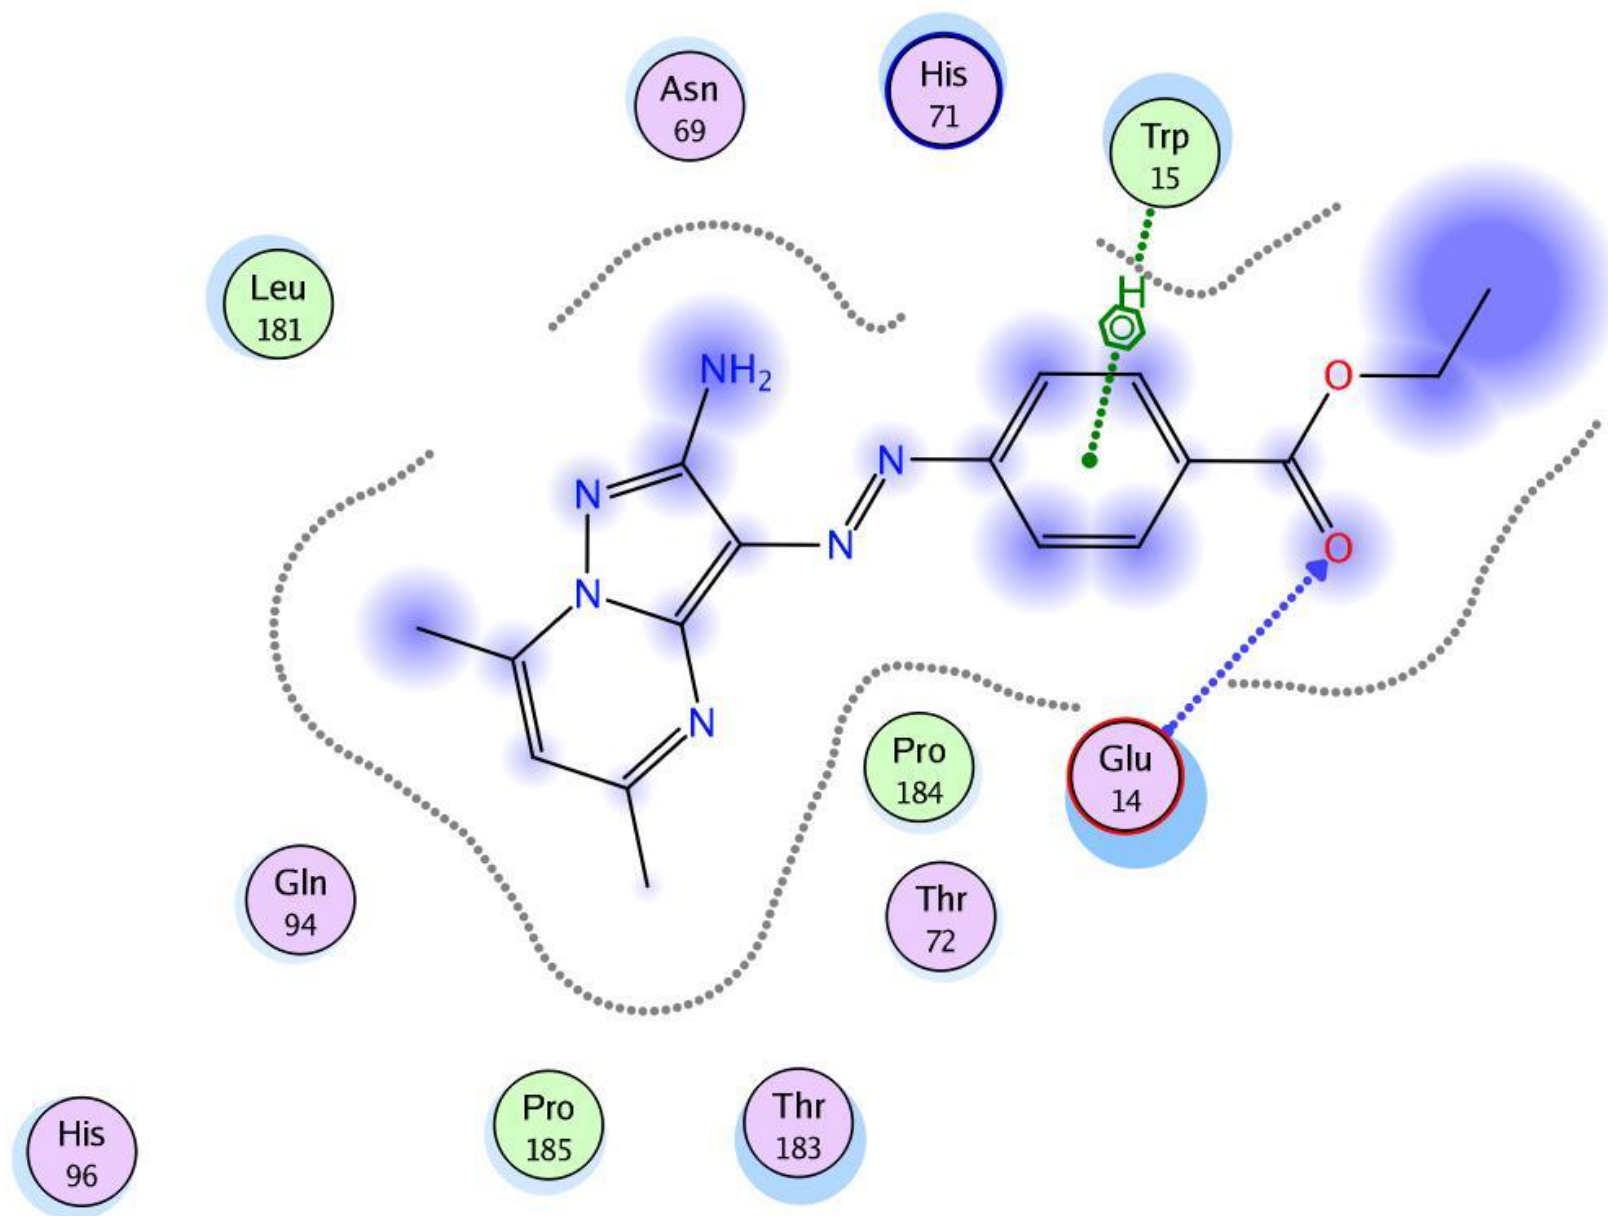

2D enzyme-ligand interaction of compounds **6** inside the active site of alpha CA (PDB: 5HPJ)

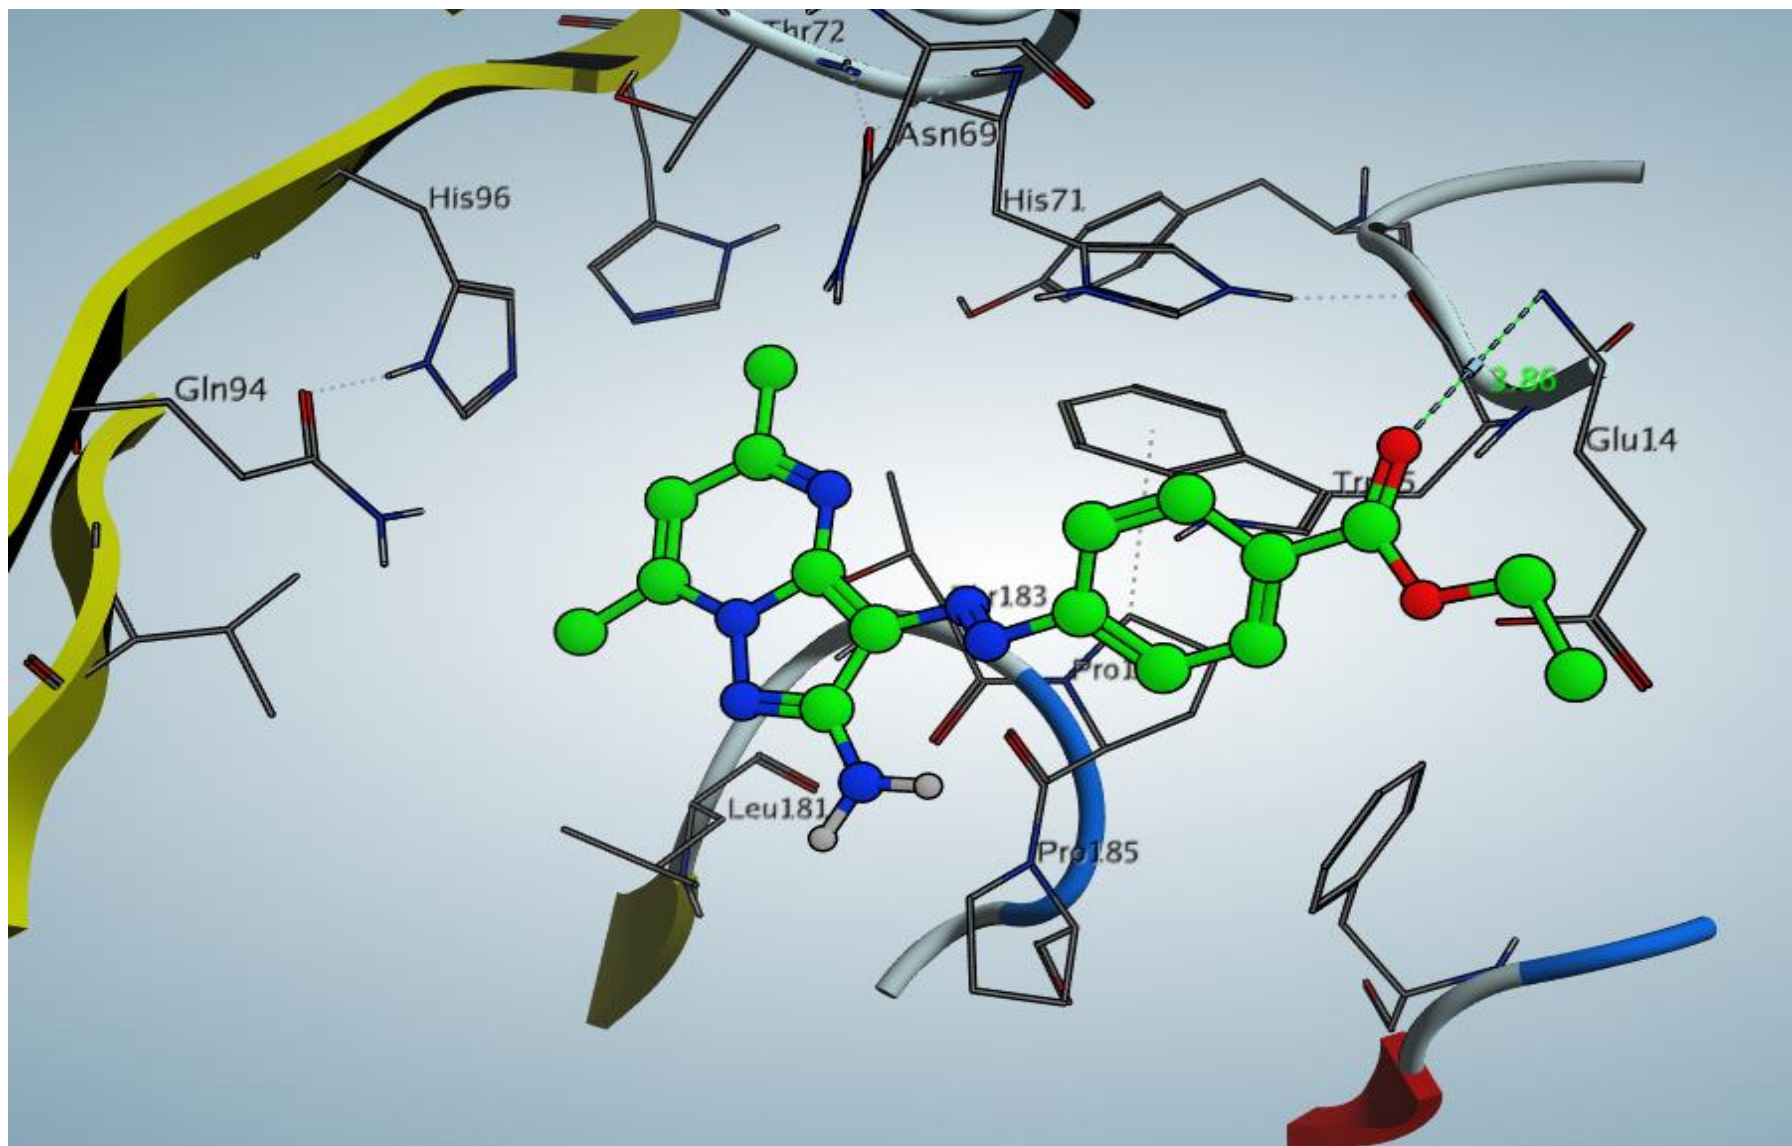

3D enzyme-ligand interaction of compounds 6 inside the active site of alpha CA (PDB: 5HPJ)

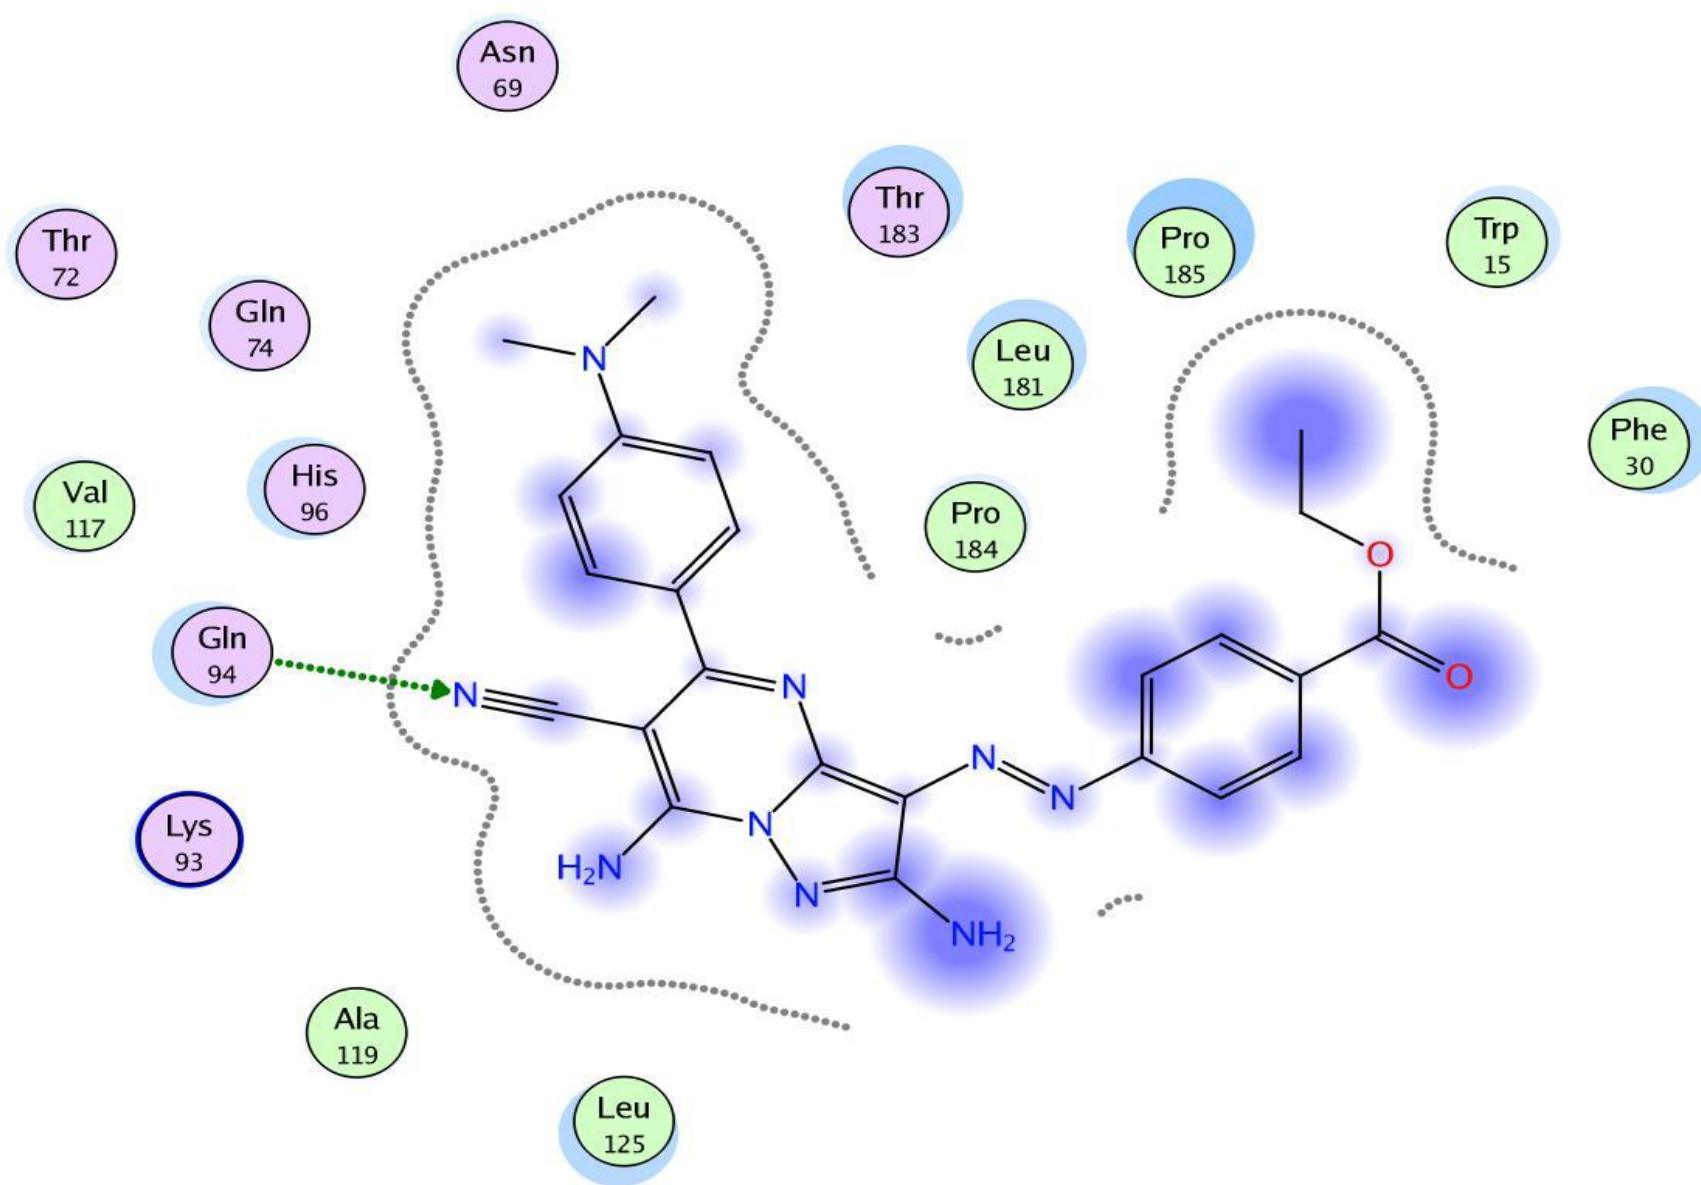

2D enzyme-ligand interaction of compounds **9a** inside the active site of  $\alpha$  CA (PDB: 5HPJ)

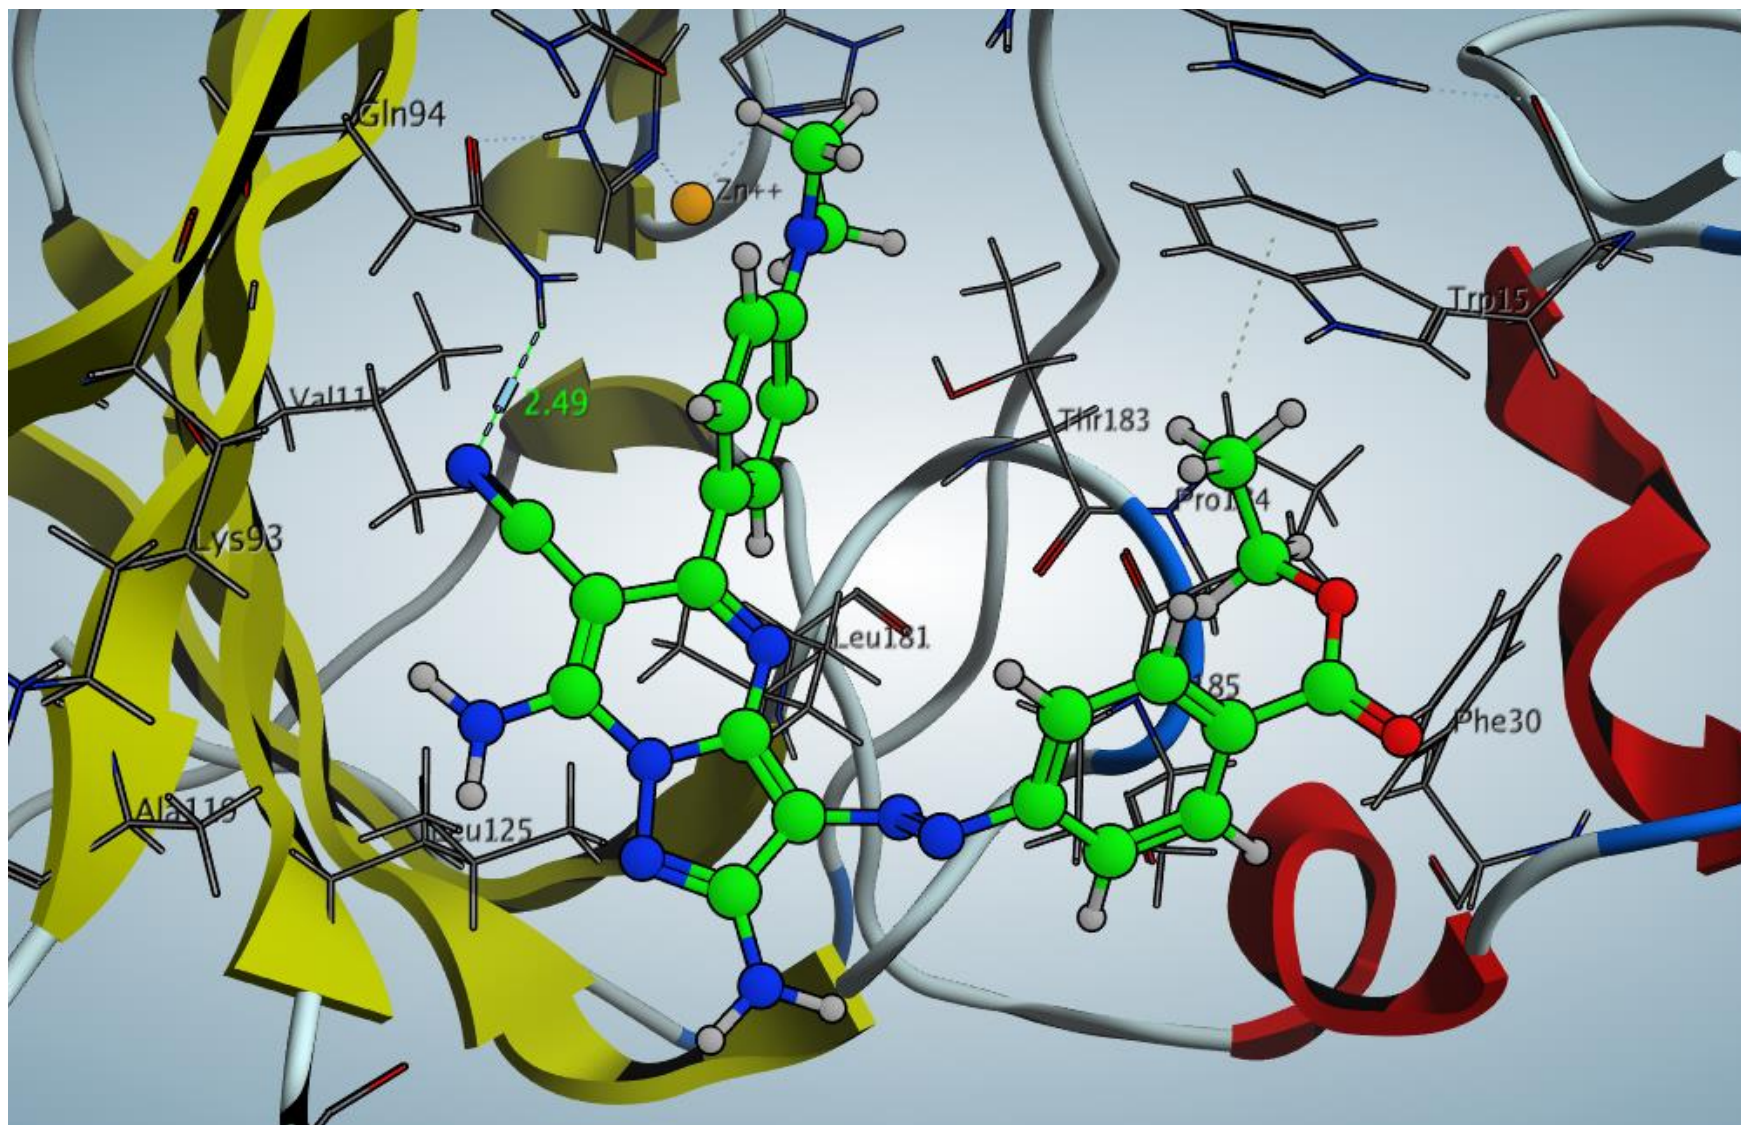

3D enzyme-ligand interaction of compounds **9a** inside the active site of  $\alpha$  CA (PDB: 5HPJ)

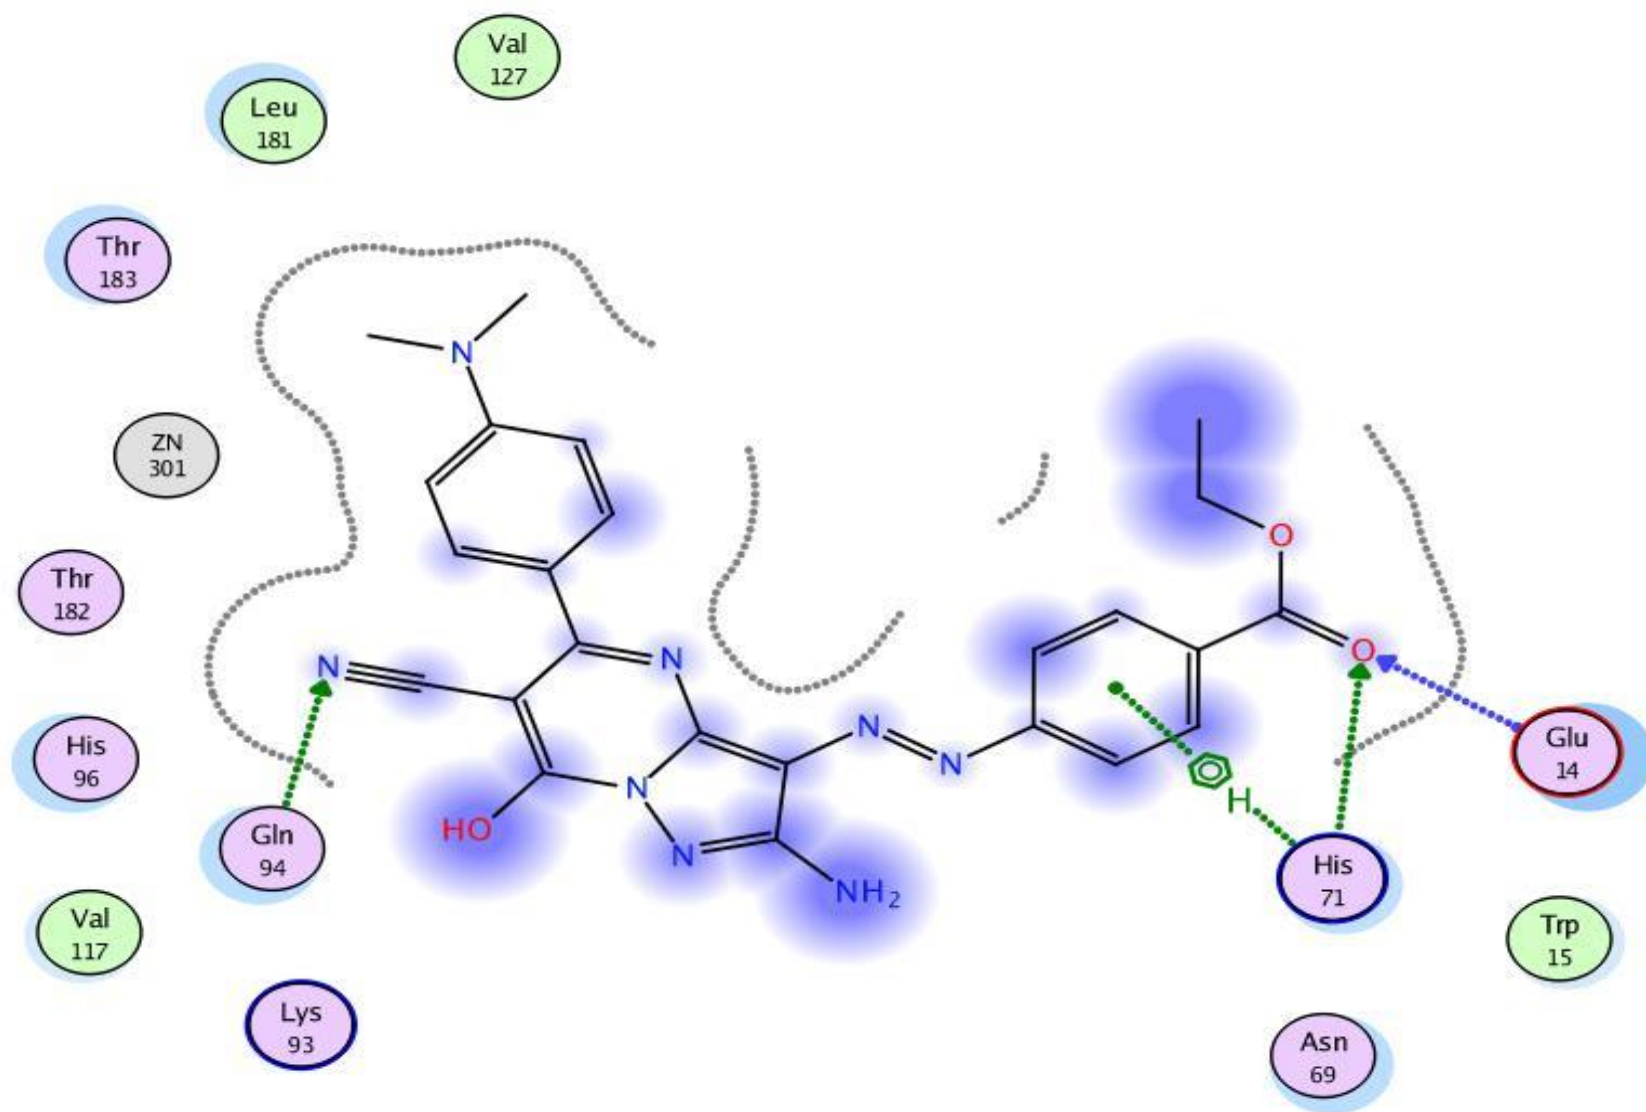

2D enzyme-ligand interaction of compounds **10a** inside the active site of alpha CA (PDB: 5HPJ)

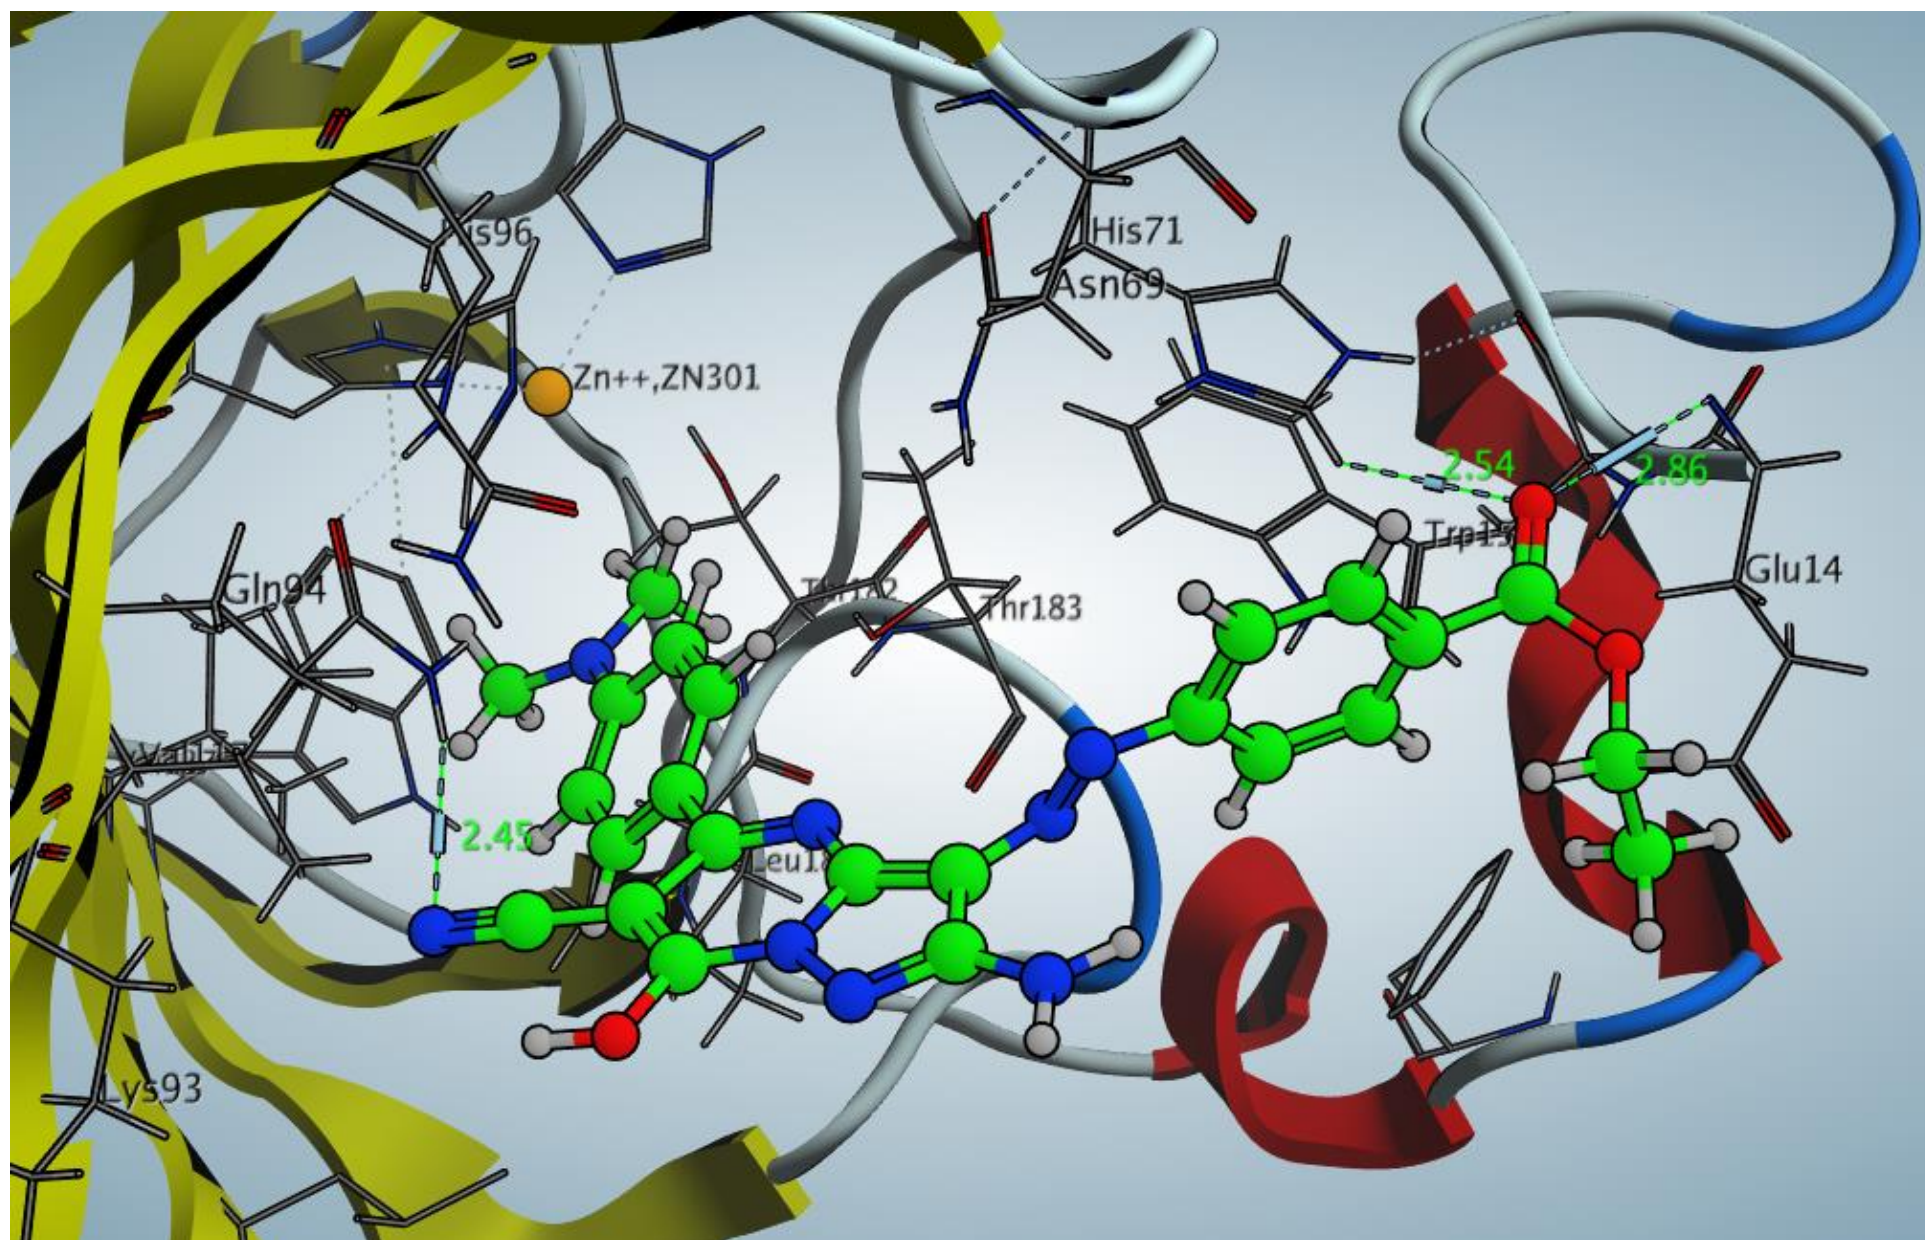

3D enzyme-ligand interaction of compounds **10a** inside the active site of  $\alpha$  CA (PDB: 5HPJ)

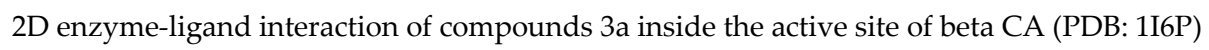

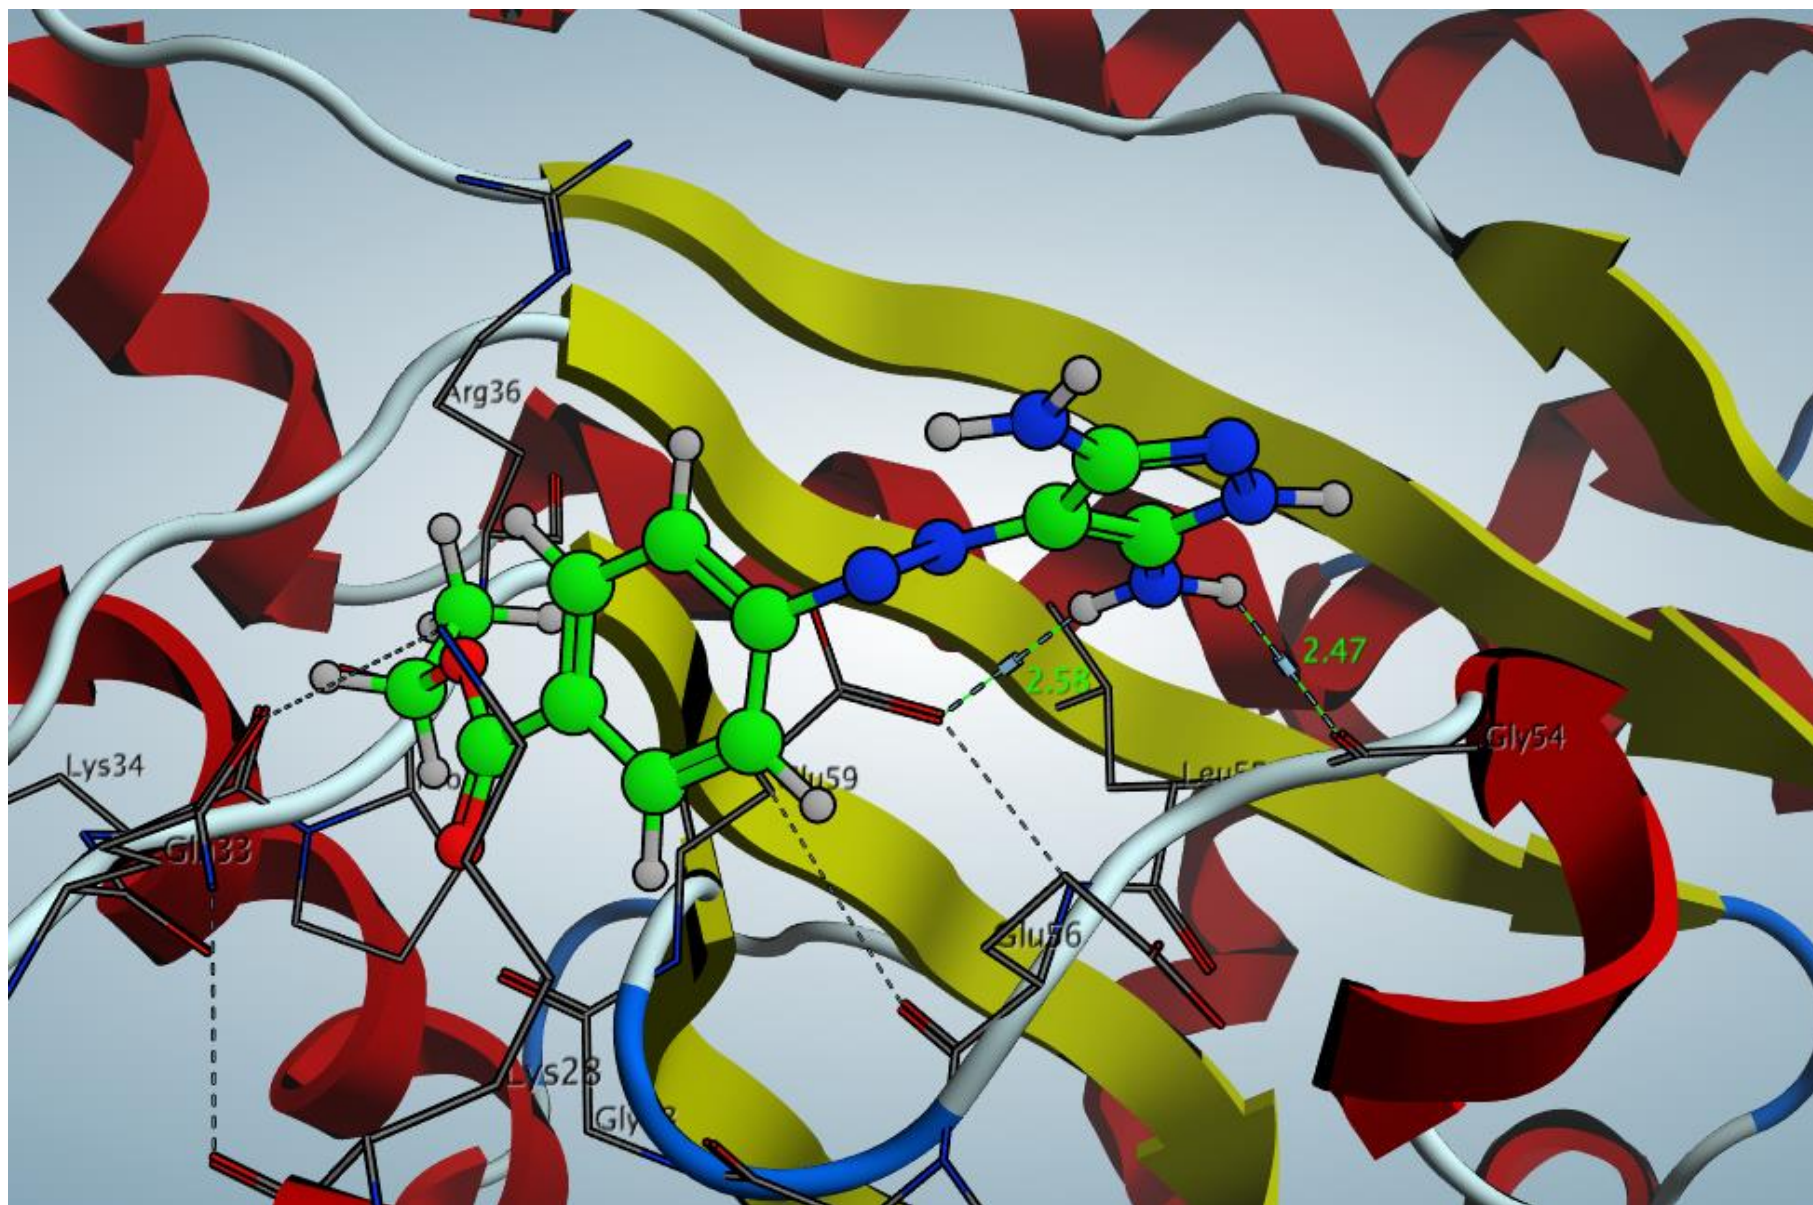

3D enzyme-ligand interaction of compounds 3a inside the active site of beta CA (PDB: 1I6P)

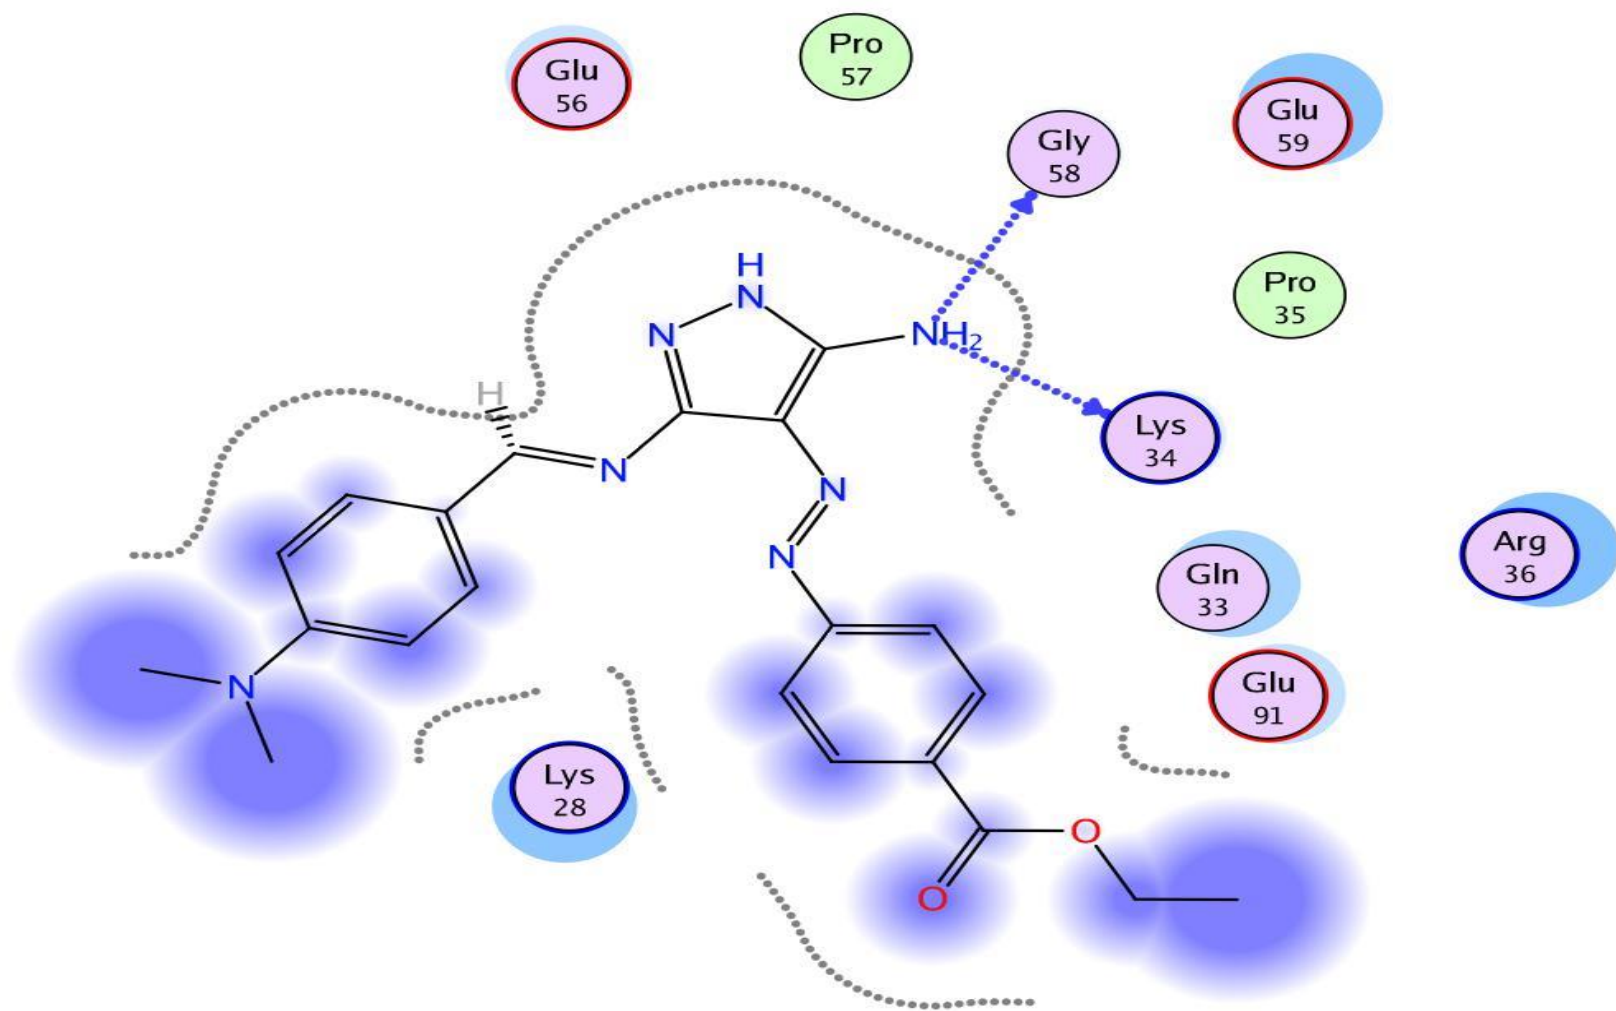

2D enzyme-ligand interaction of compounds 5a inside the active site of beta CA (PDB: 1I6P)

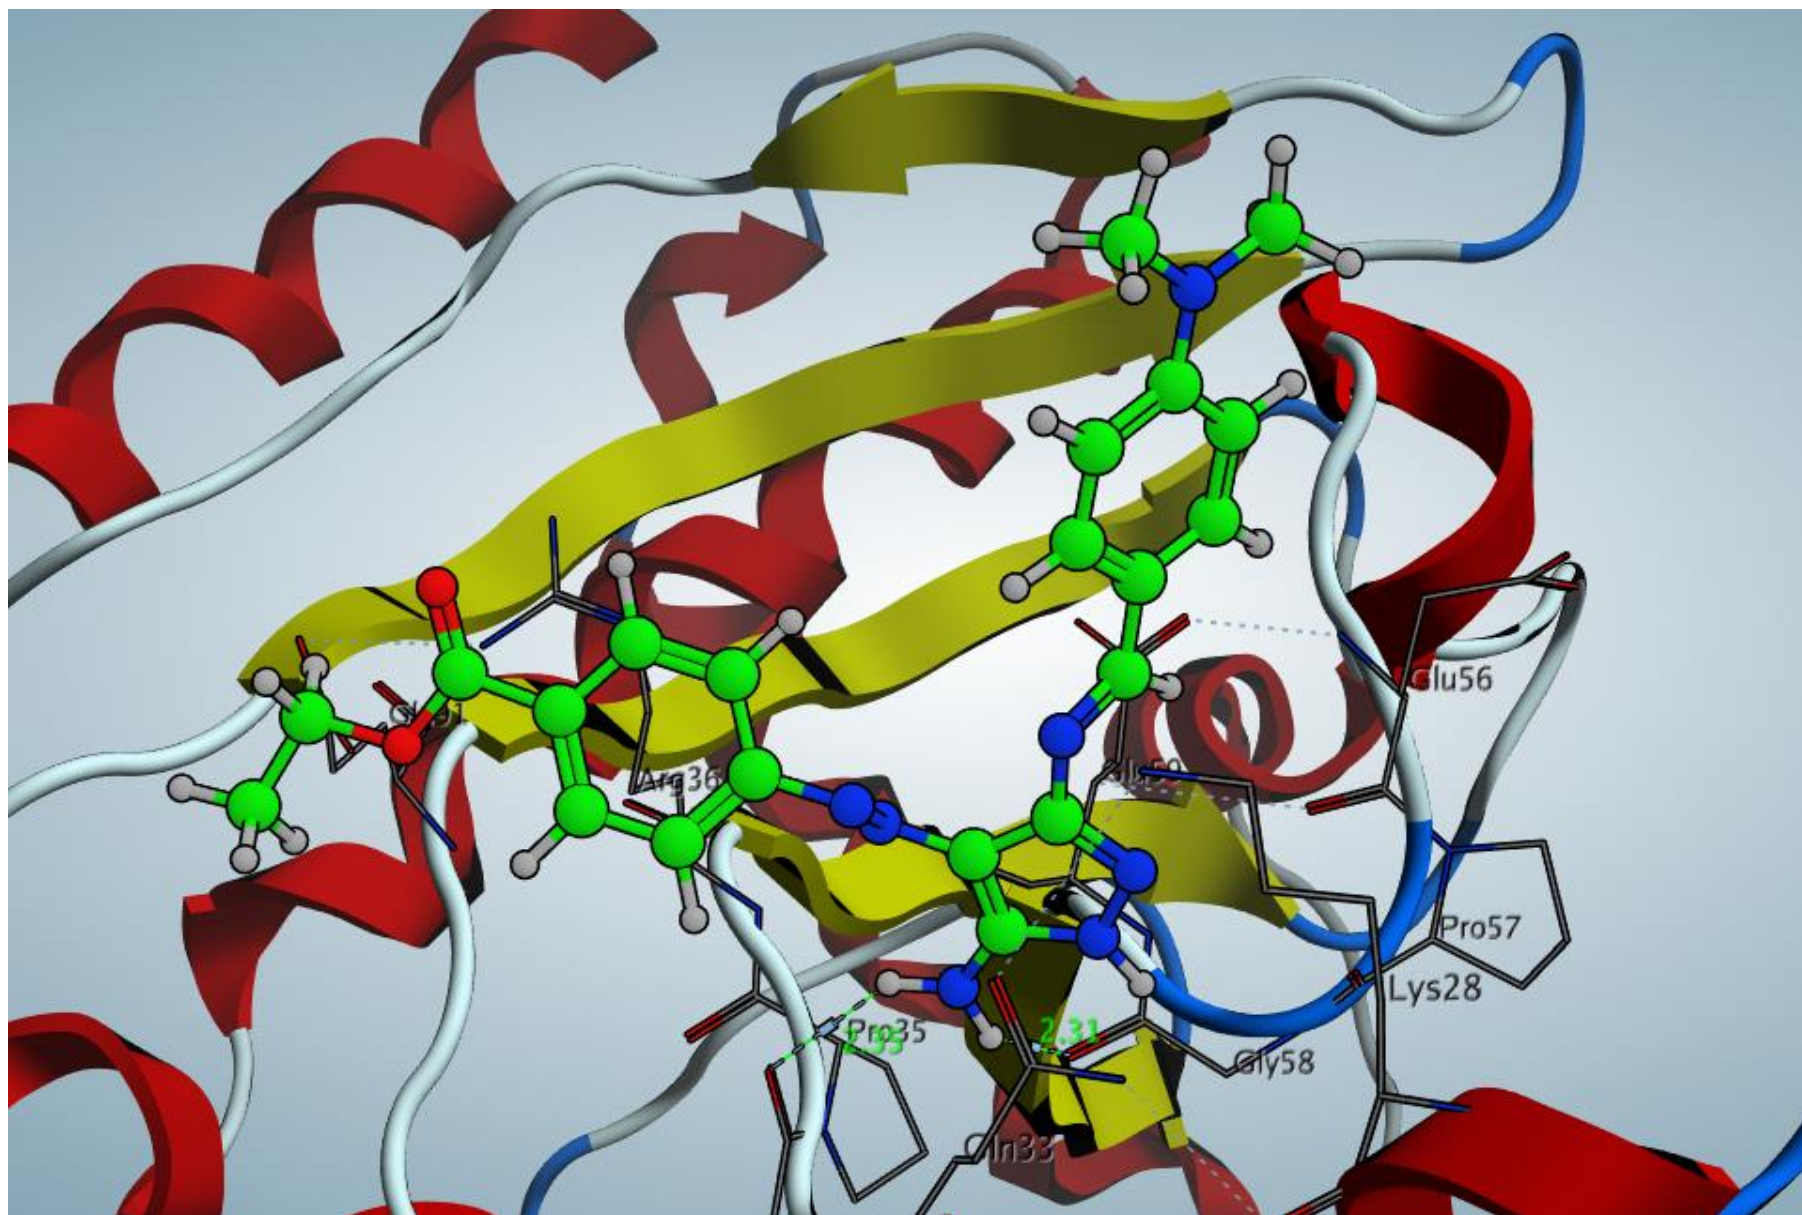

3D enzyme-ligand interaction of compounds 5a inside the active site of beta CA (PDB: 1I6P)

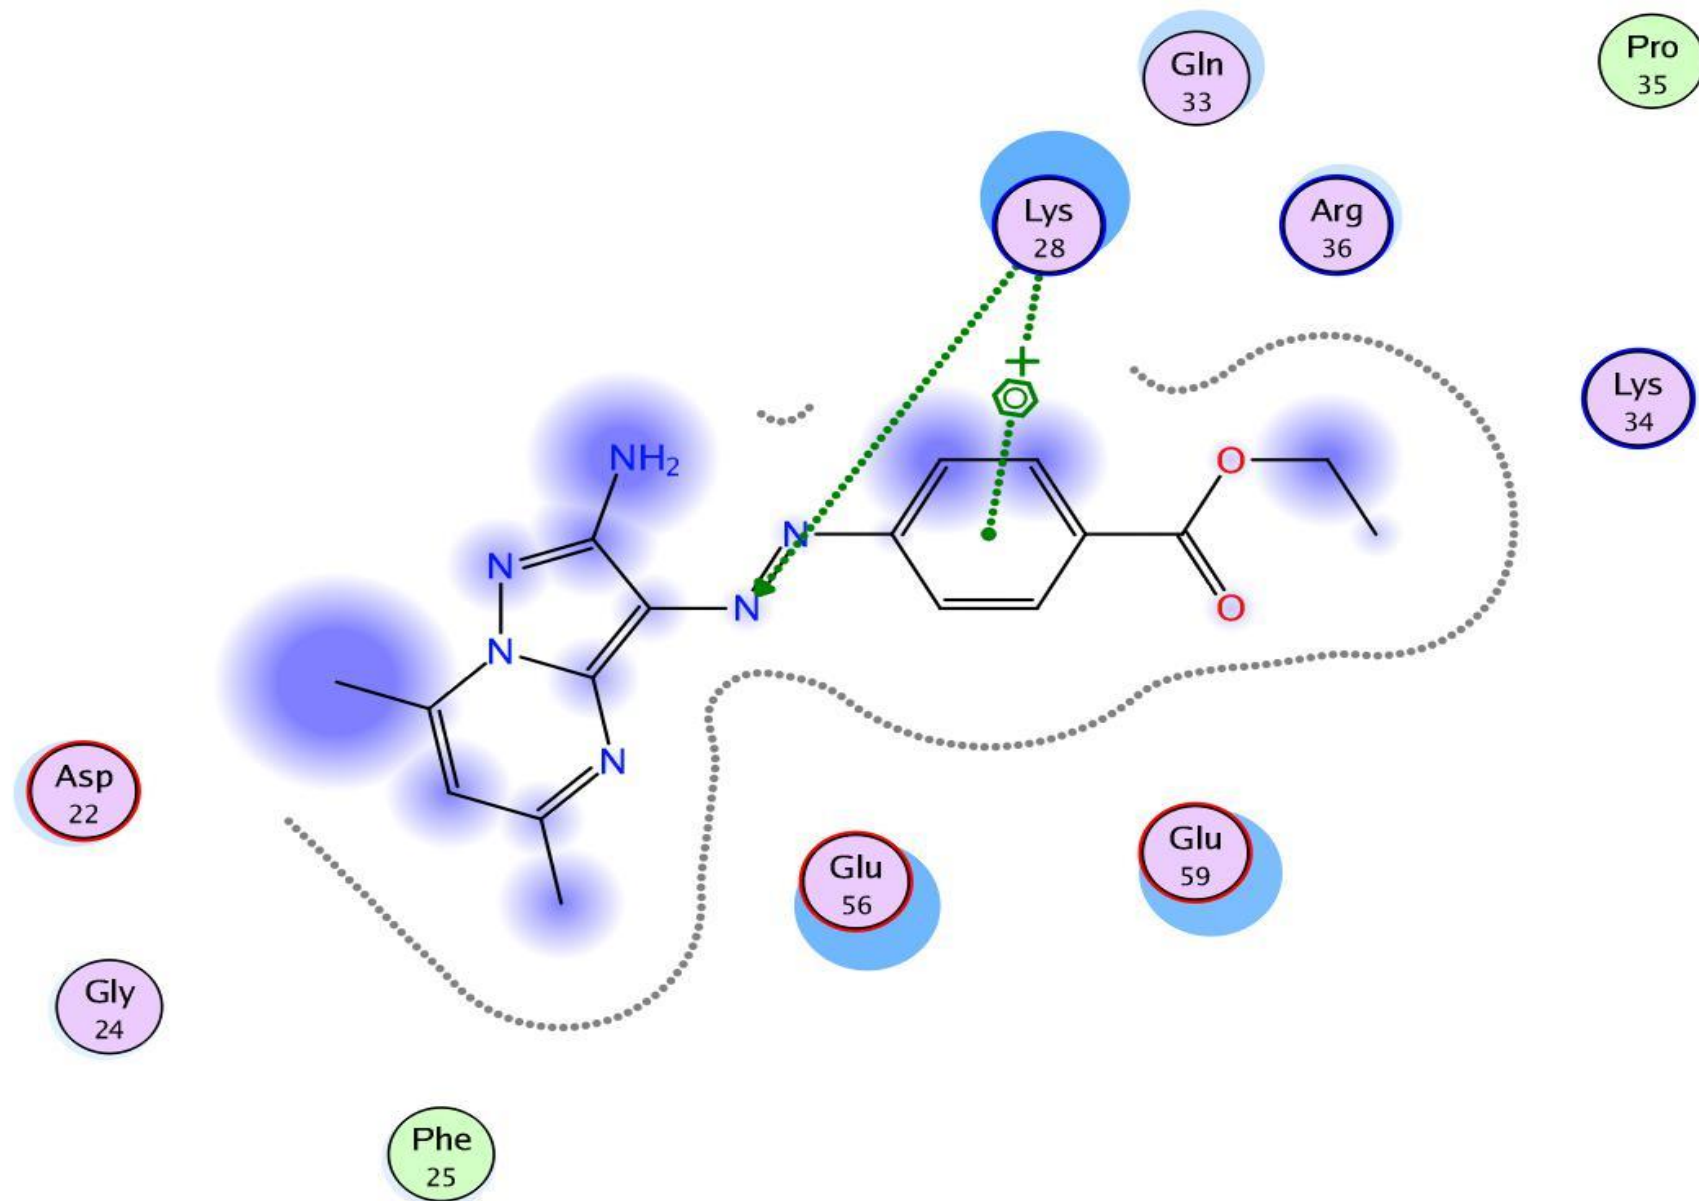

2D enzyme-ligand interaction of compounds 6 inside the active site of beta CA (PDB: 1I6P)

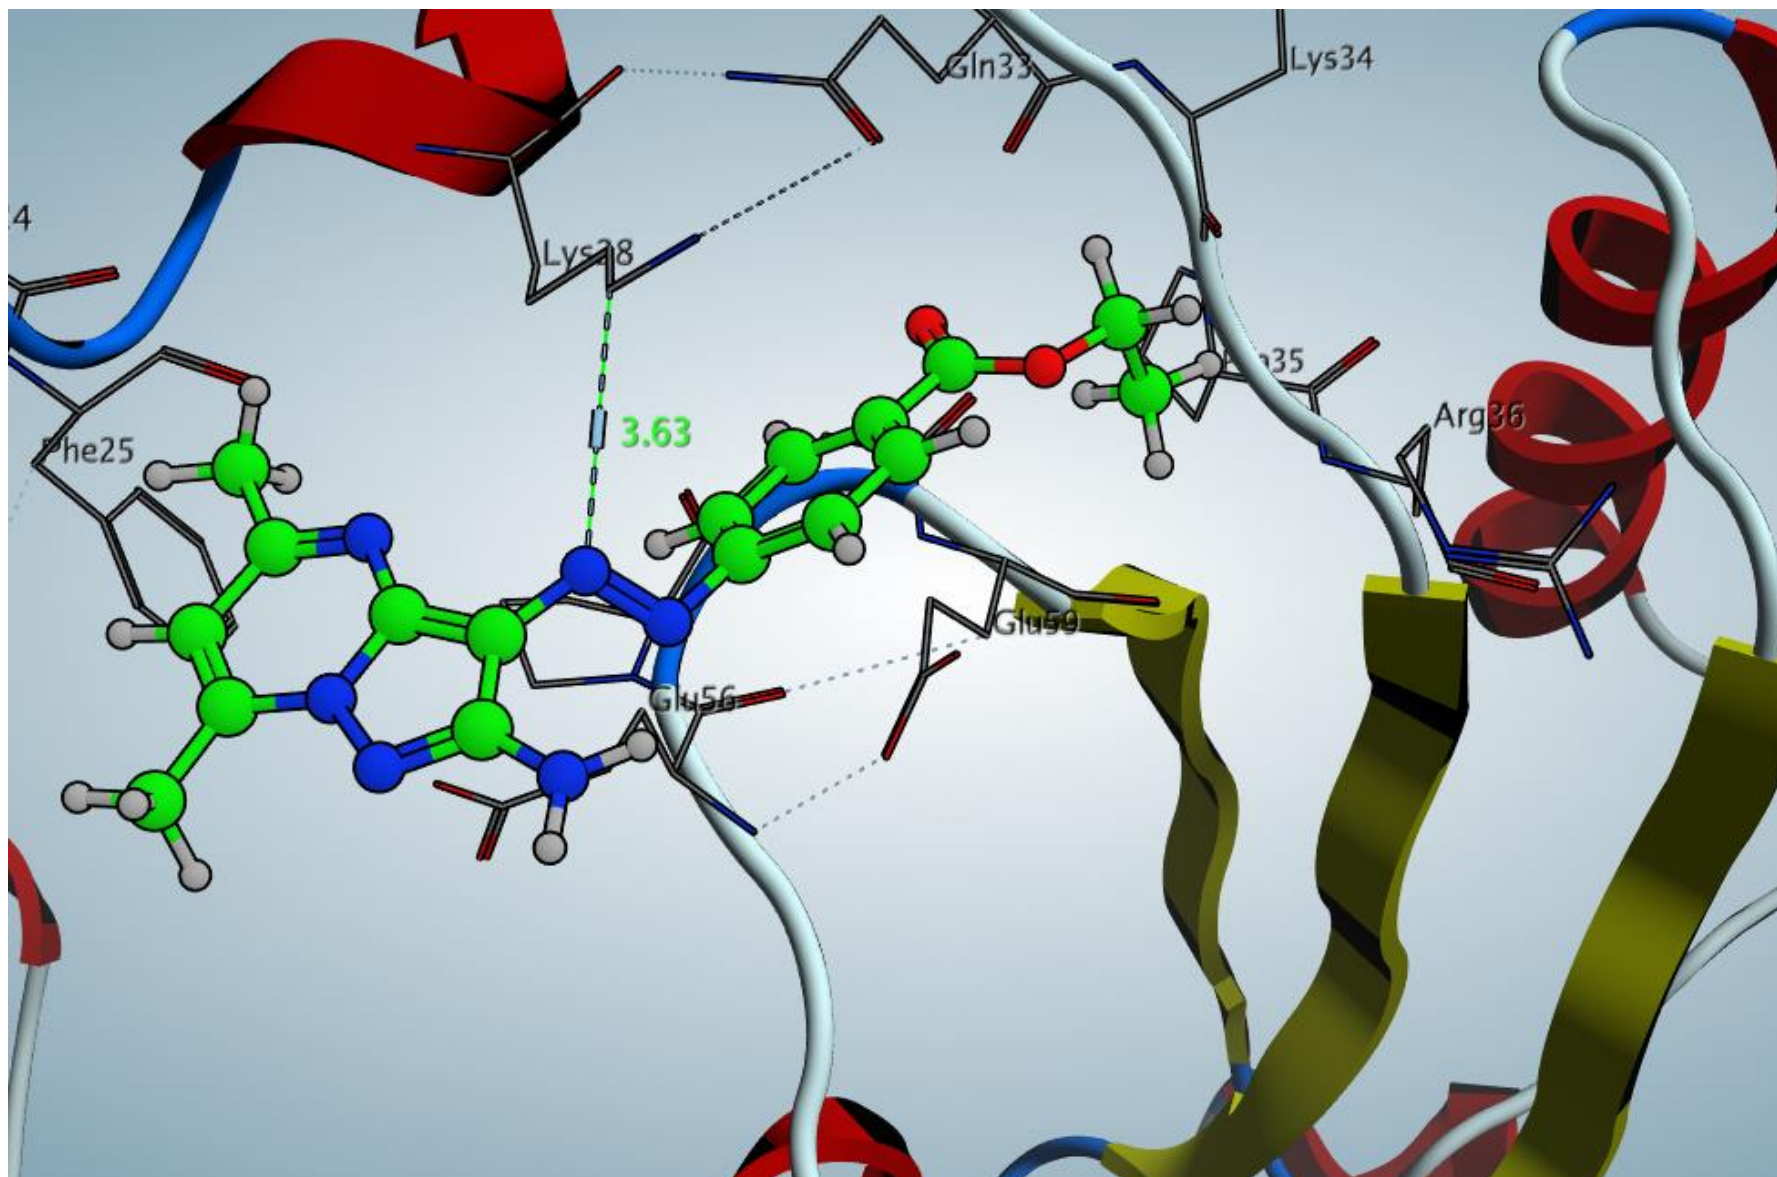

3D enzyme-ligand interaction of compounds 6 inside the active site of beta CA (PDB: 1I6P)



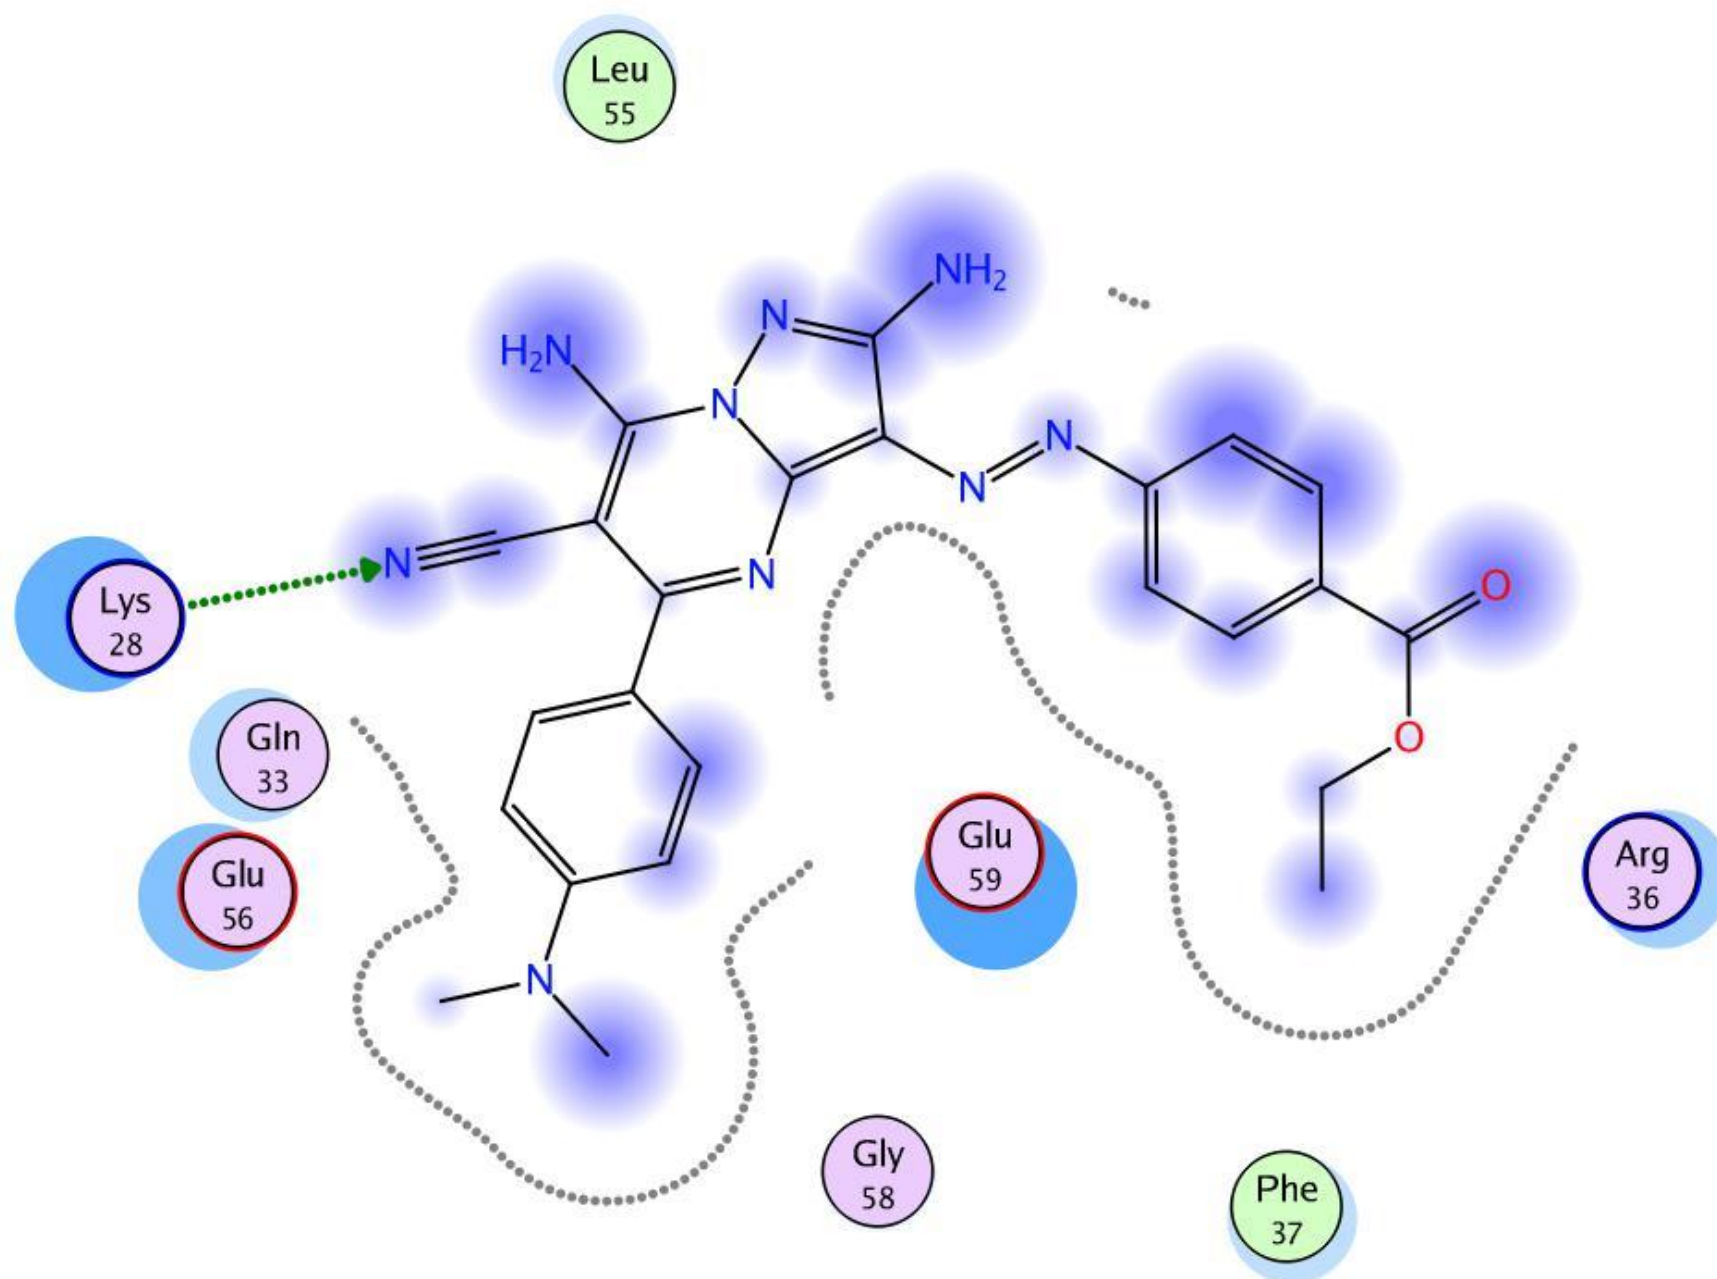

2D enzyme-ligand interaction of compounds 9a inside the active site of beta CA (PDB: 1I6P)

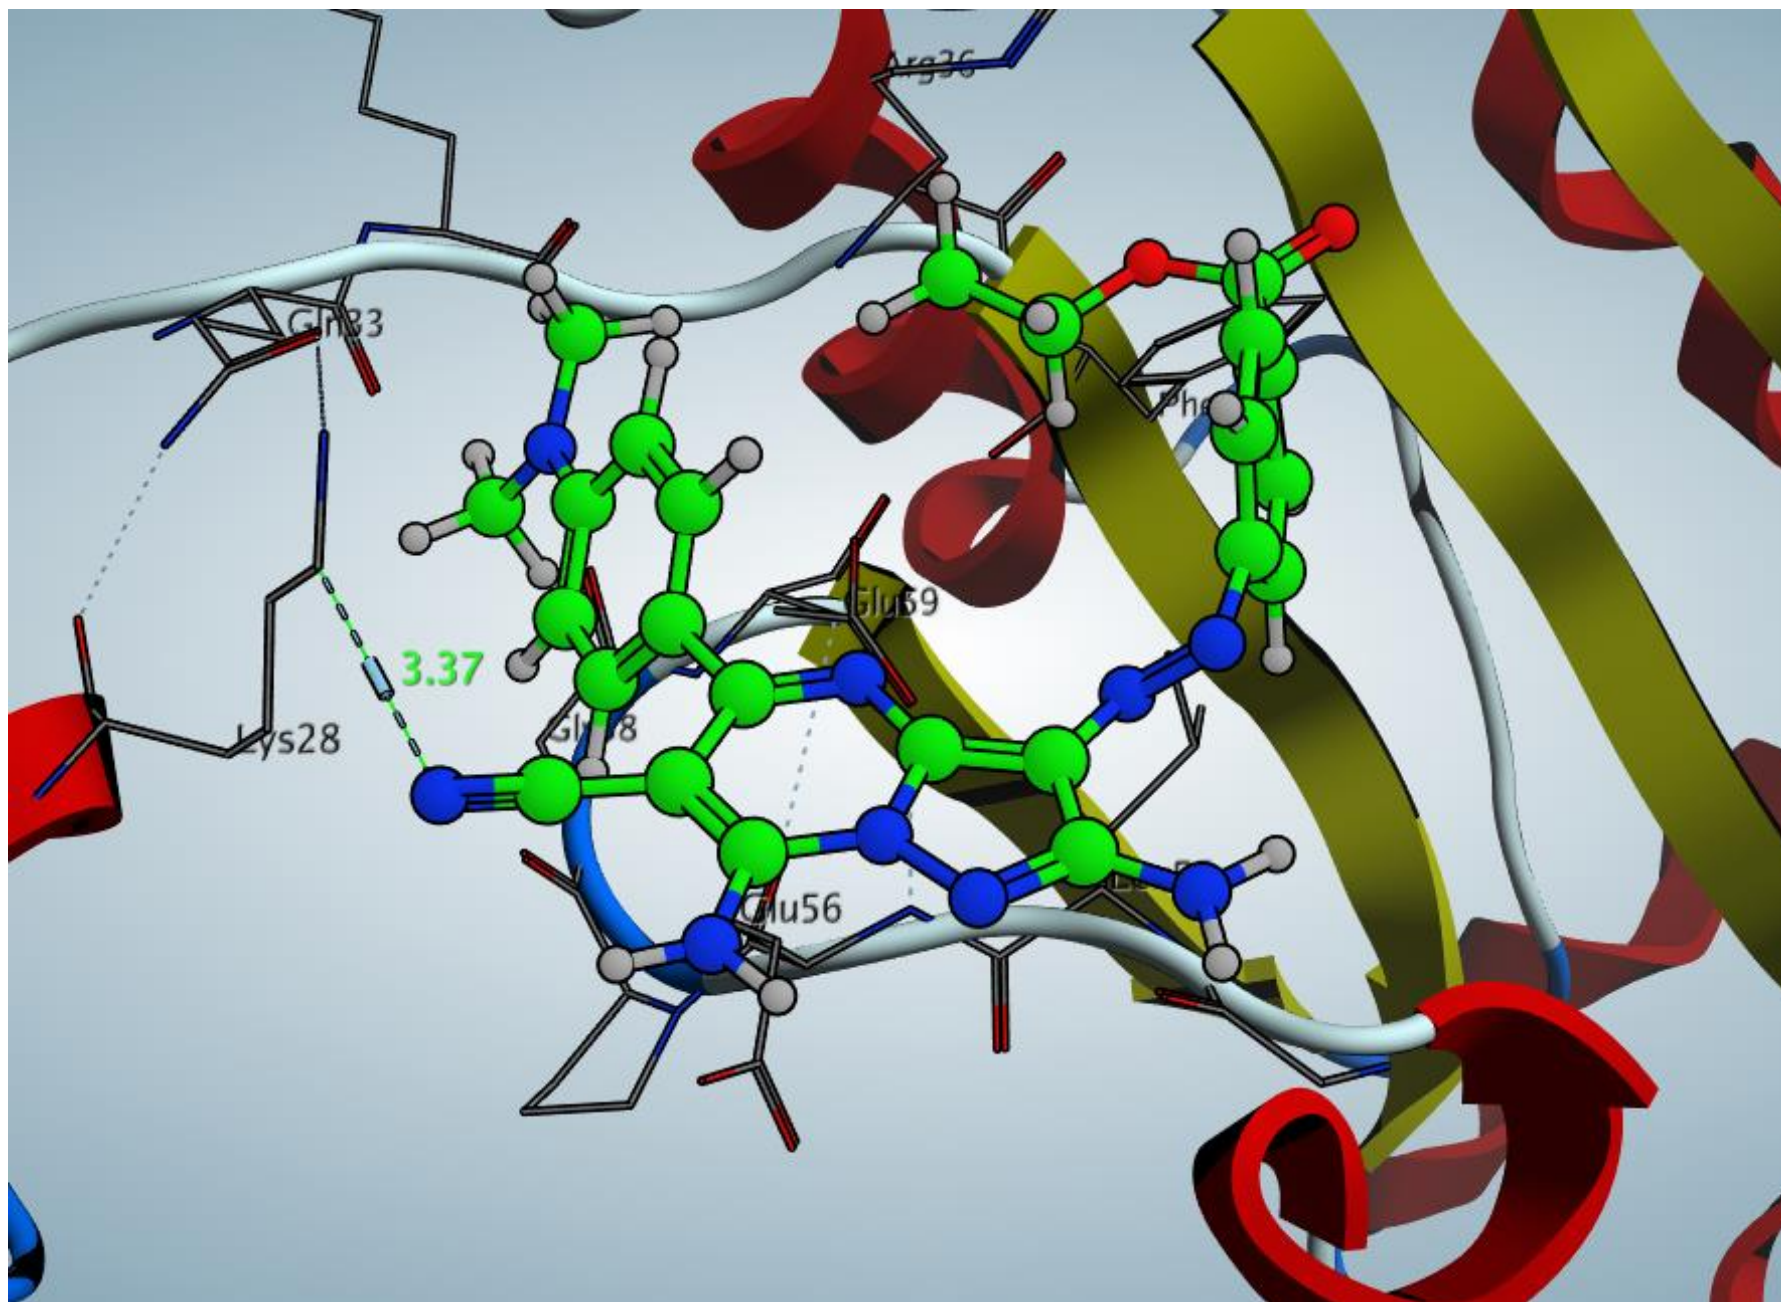

3D enzyme-ligand interaction of compounds 9a inside the active site of beta CA (PDB: 1I6P)

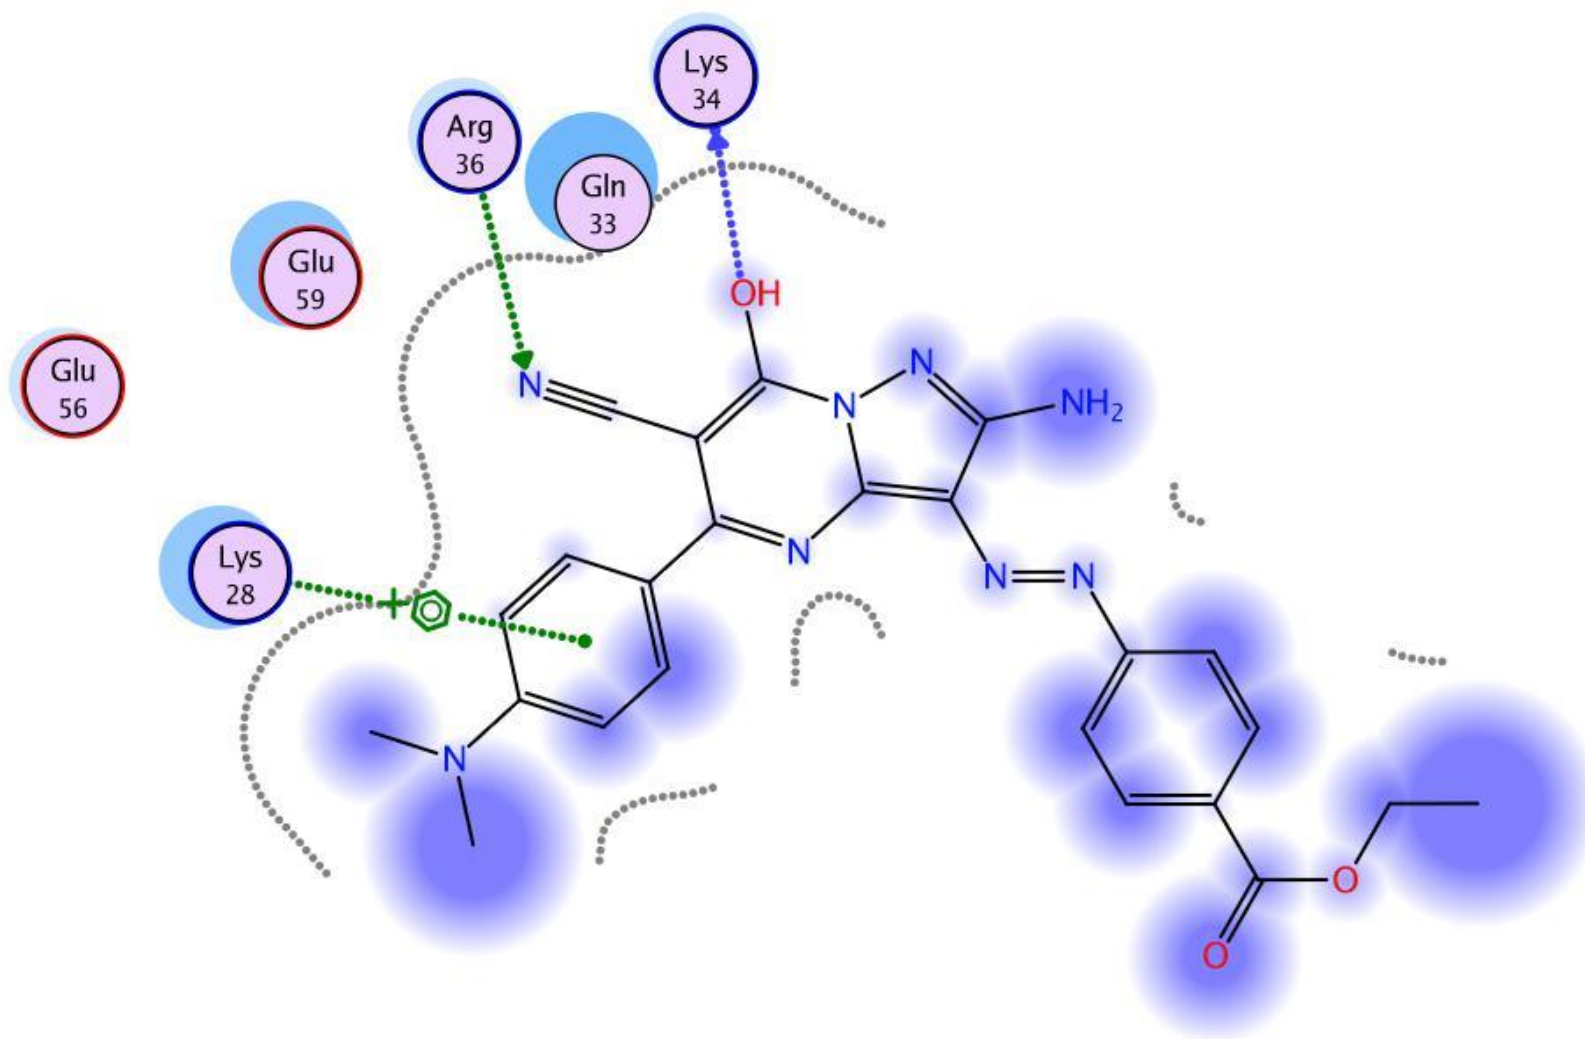

2D enzyme-ligand interaction of compounds 10a inside the active site of beta CA (PDB: 1I6P)

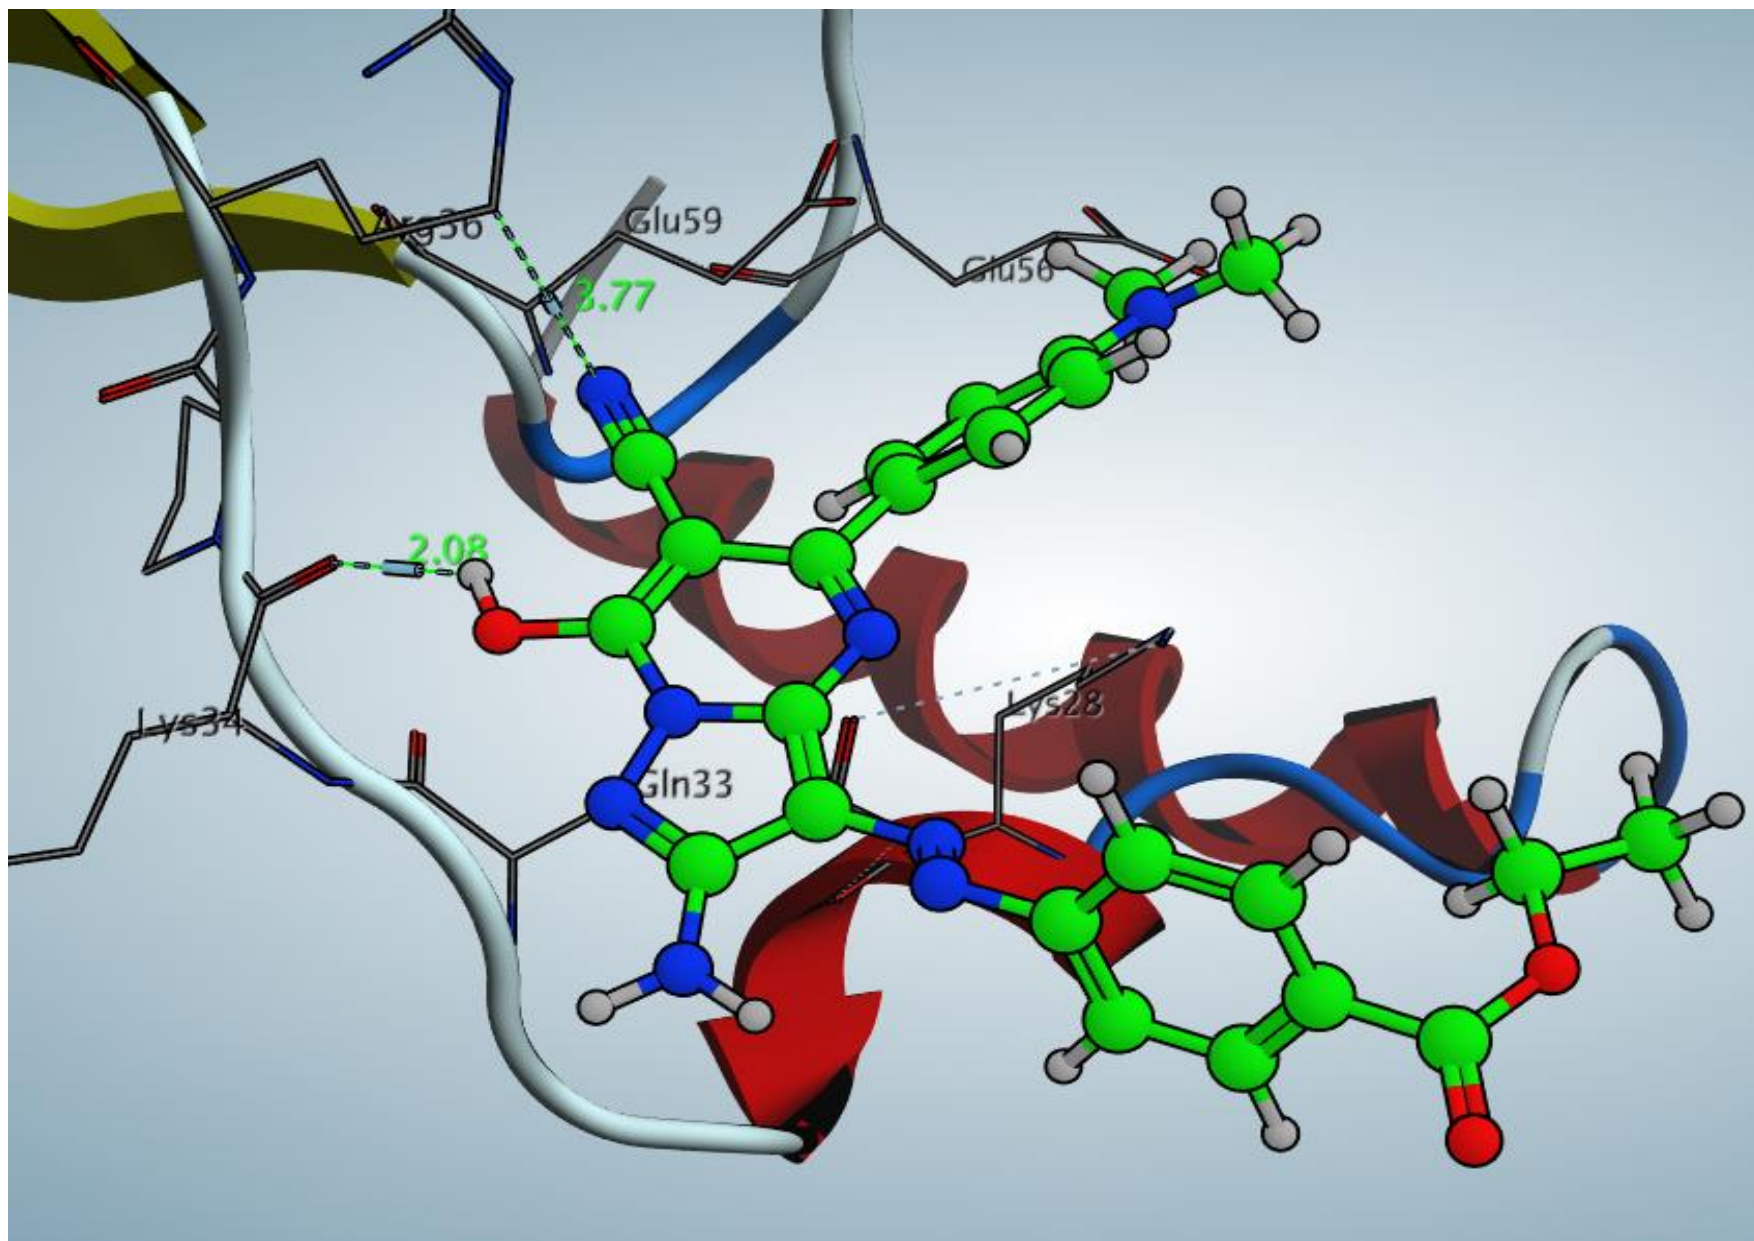

3D enzyme-ligand interaction of compounds **10a** inside the active site of beta CA (PDB: 1I6P)
